# Supplementary material for: Selective antitumour activity and ERα molecular docking studies of newly synthesizedd-homo fused steroidal tetrazoles
Source: Royal Society of Chemistry journal article supplement (doi:10.1039/c2md20327h), 2012-11-06

SUPPLEMENTAL INFORMATION

## Antitumour activity and ER $\alpha$ molecular docking studies of newly synthesized D-homo fused steroidal tetrazoles

Katarina M. Penov-Gaši<sup>1</sup>, Aleksandar M. Oklješa<sup>1</sup>, Edward T. Petri<sup>\*2</sup>, Andjelka S. Ćelić<sup>2</sup>, Evgenija A. Djurendić<sup>1</sup>, Olivera R. Klisurić<sup>3</sup>, Janos J. Csanadi<sup>1</sup>, Gyula Batta<sup>4</sup>, Andrea R. Nikolić<sup>1</sup>, Dimitar S. Jakimov<sup>5</sup> and Marija N. Sakač<sup>1</sup>

*Departments of <sup>1</sup>Chemistry, Biochemistry and Environmental Protection; <sup>2</sup>Biology and Ecology; and <sup>3</sup>Physics; Faculty of Sciences, University of Novi Sad, Trg Dositeja Obradovića 3, 21000 Novi Sad, Serbia. <sup>4</sup>Department of Organic Chemistry, University of Debrecen, Hungary. <sup>5</sup>Oncology Institute of Vojvodina, Institutski put 4, 21204 Sremska Kamenica, Serbia*

Corresponding author: [\\*edward.petri@dbe.uns.ac.rs](mailto:edward.petri@dbe.uns.ac.rs)

<sup>1</sup>H NMR compound 6

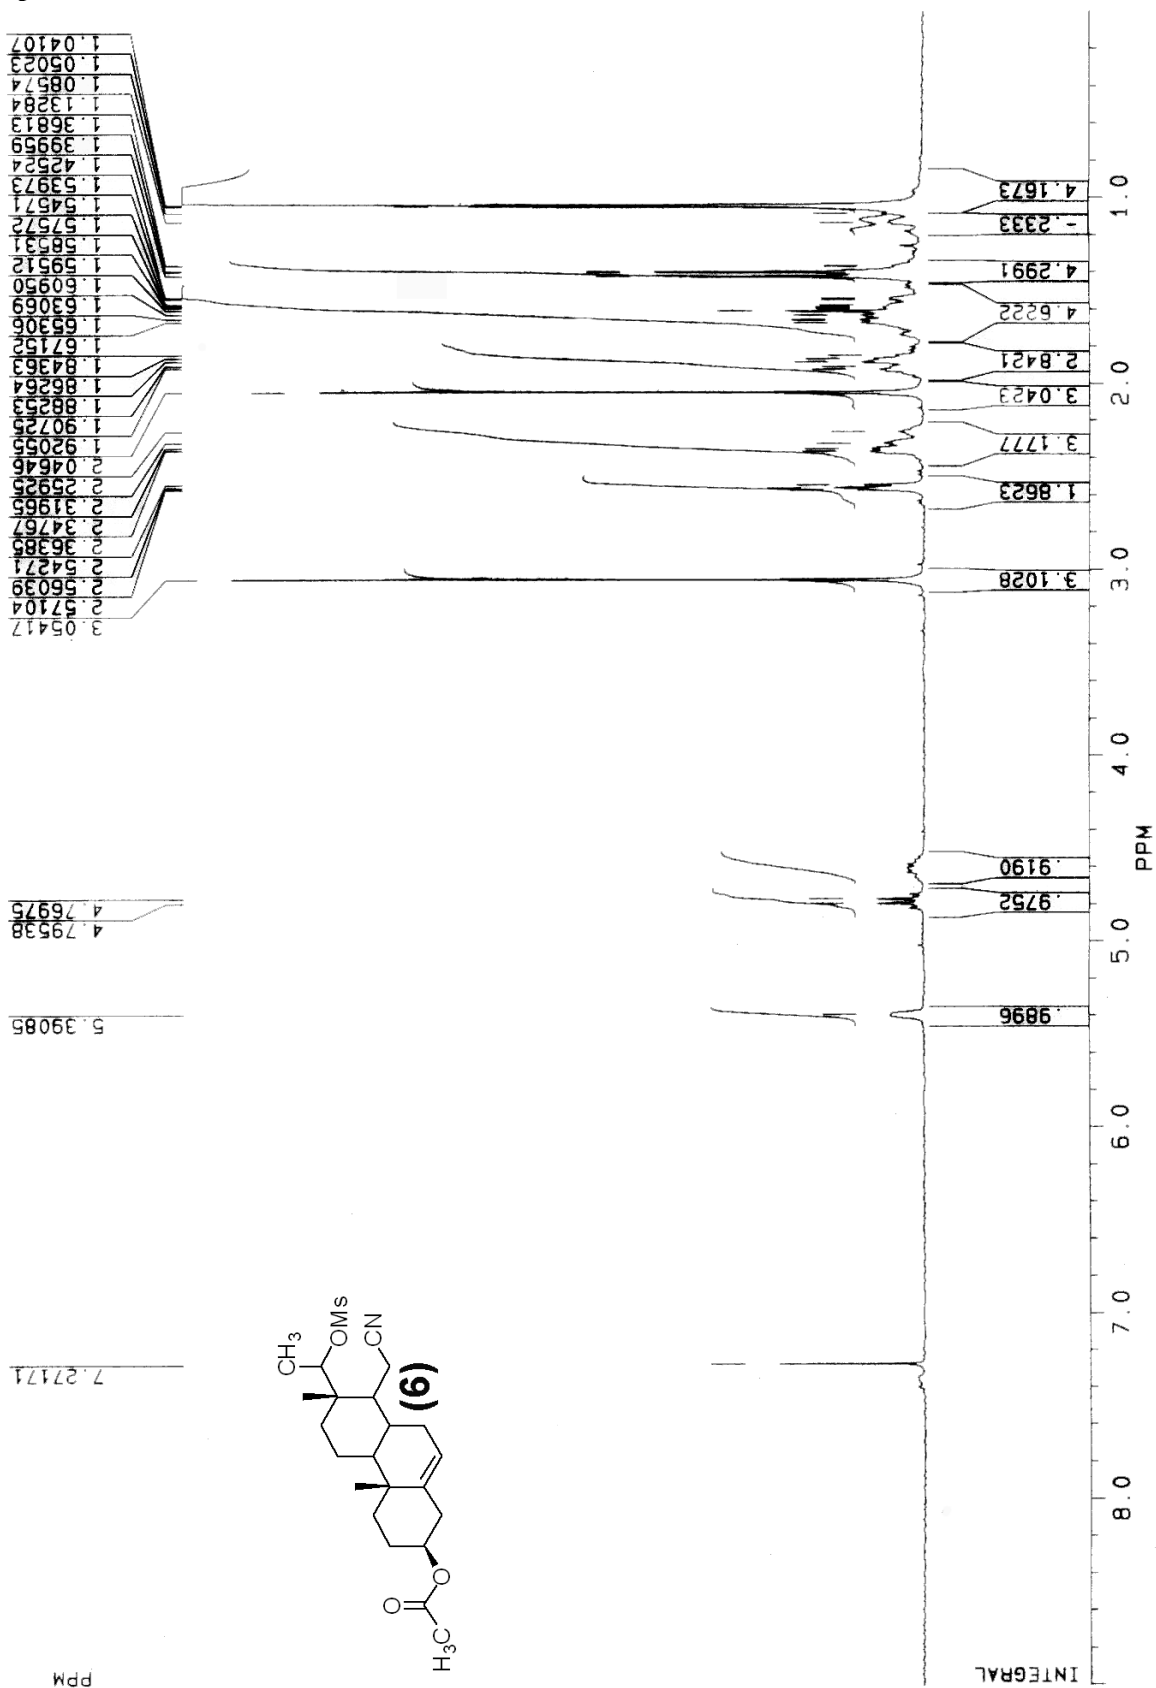

<sup>13</sup>C NMR compound 6

15.075  
15.391  
17.177  
19.107  
19.761  
21.390  
27.540  
30.999  
31.911  
36.567  
36.756  
37.647  
39.193  
40.531  
42.092  
48.607

73.565  
76.499  
77.006  
77.516  
82.832

119.041  
121.299

139.264

170.526

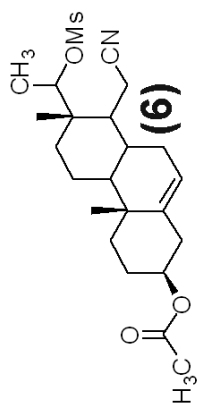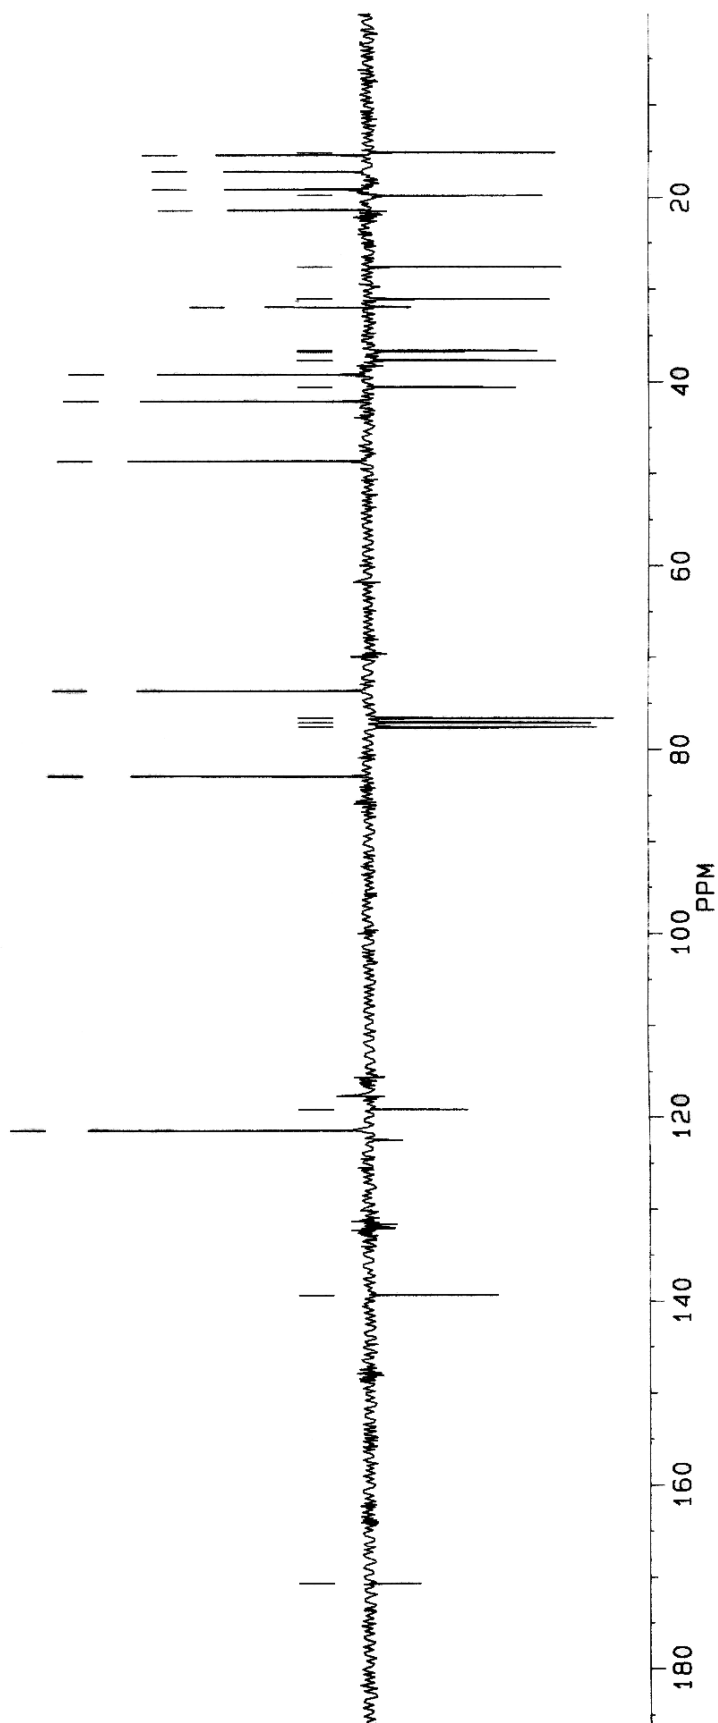

IR compound 6

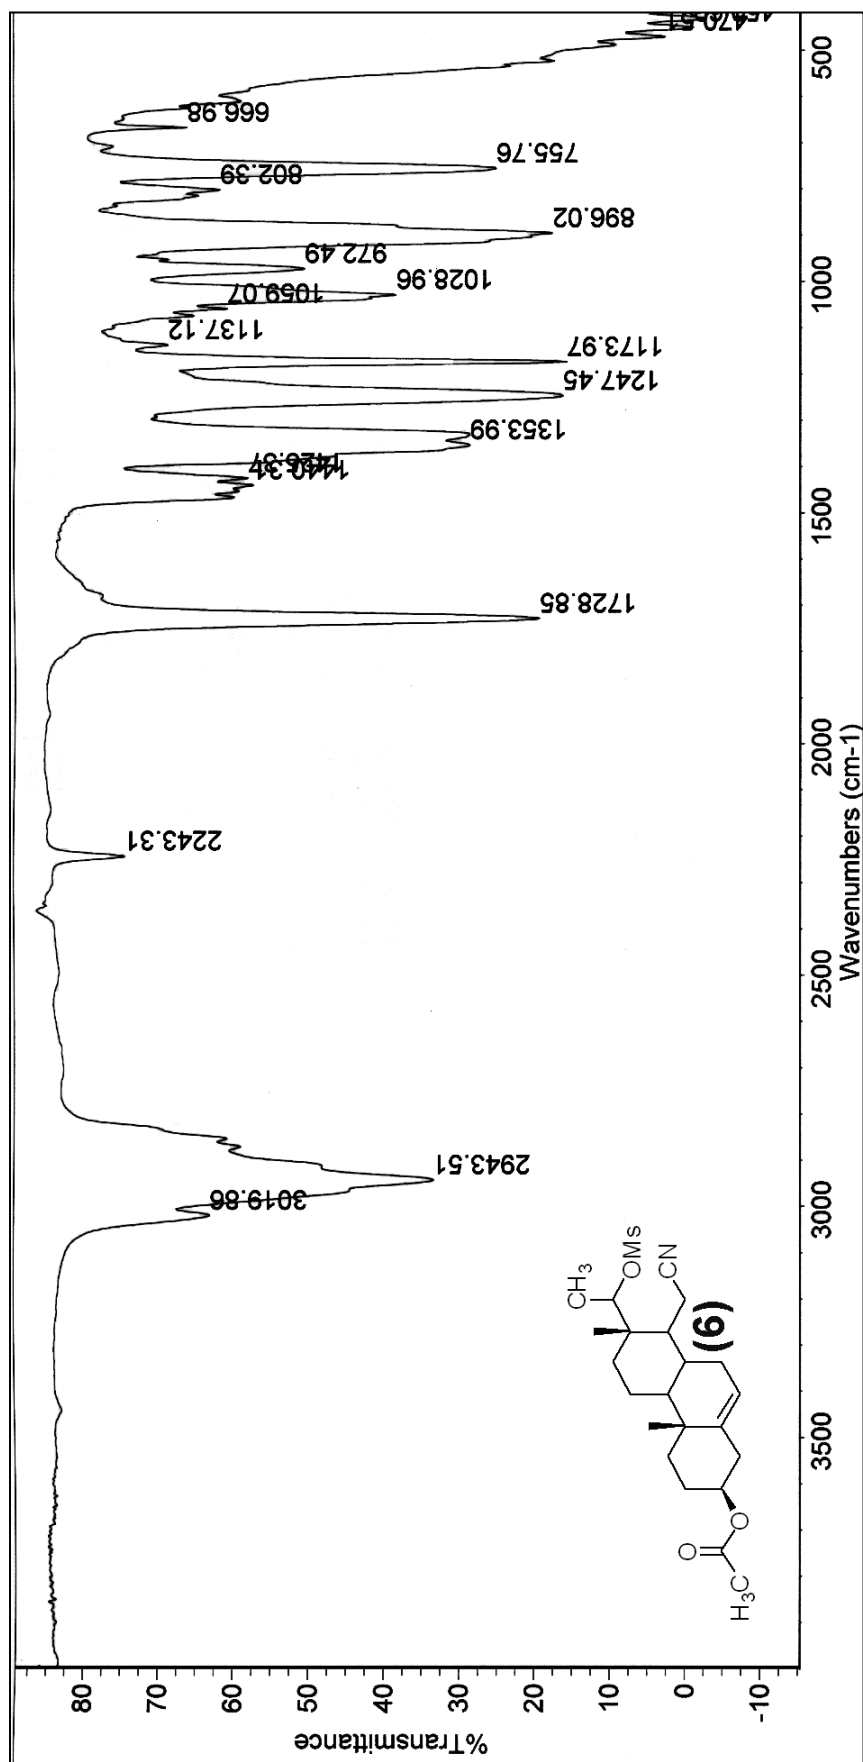

HRMS compound 6

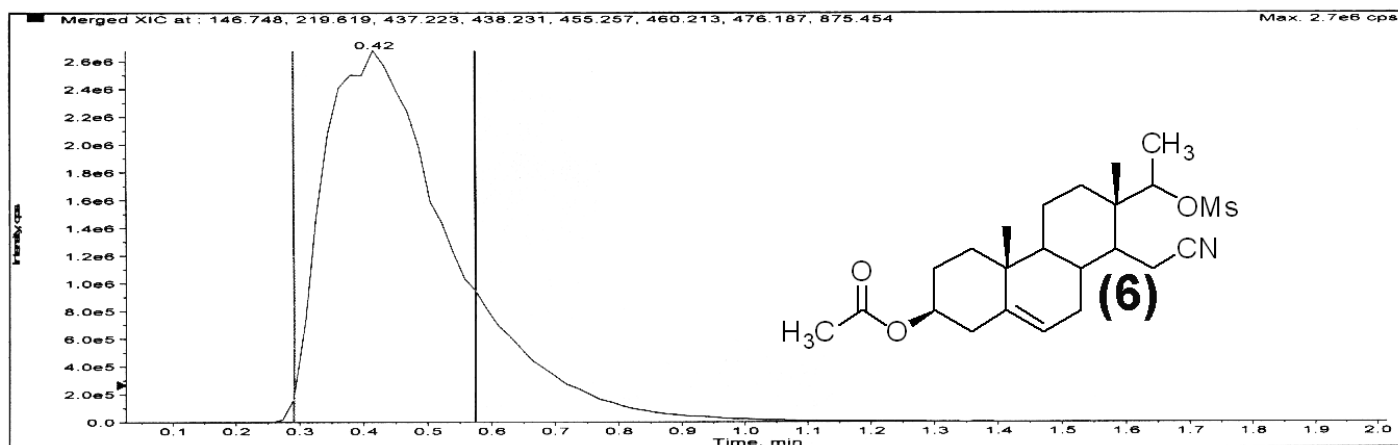

Merged XIC, Period# : 1 Experiment# : 1

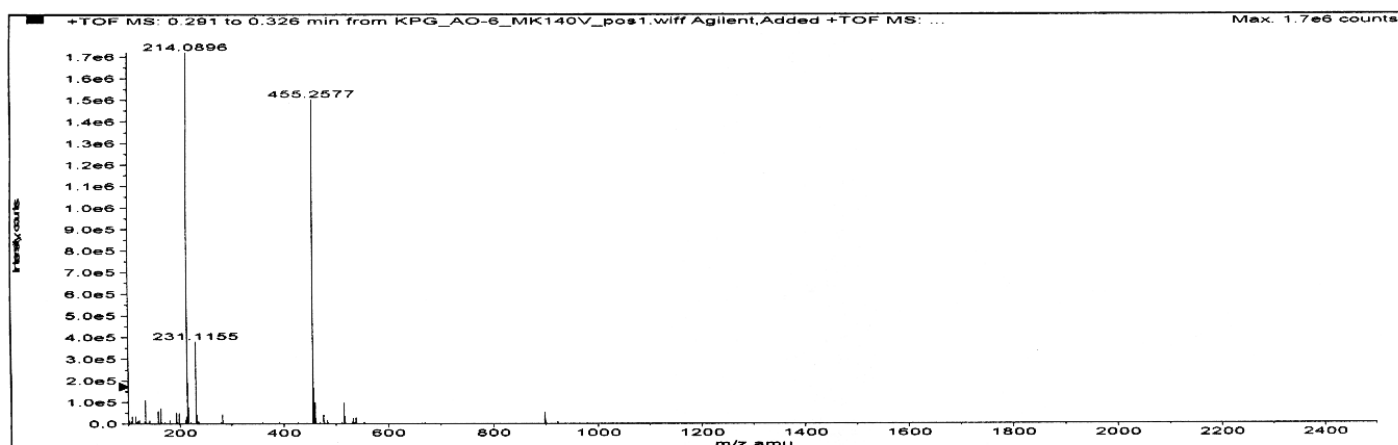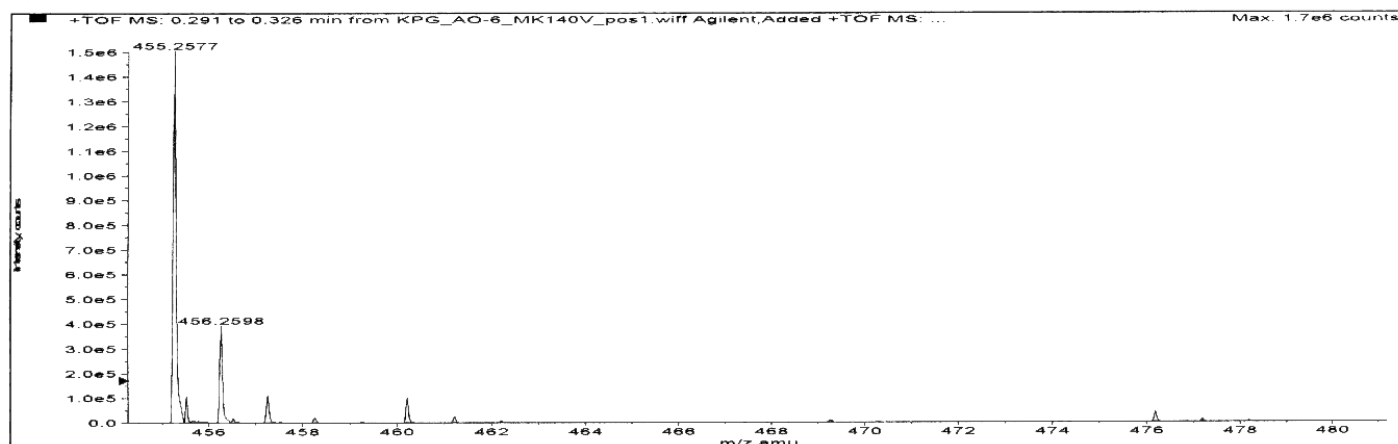

| Formula    | Compound name | Mass      | Peak RT (min) | Peak area  | Description |
|------------|---------------|-----------|---------------|------------|-------------|
| C23H35NO5S | --            | 437.22359 | 0.42          | 3.75659 E7 | --          |

| Species              | Abundance (counts) | Ion Mass  | Measured Mass | Error (mDa) | Error (ppm) | Ret. Time Error (min) |
|----------------------|--------------------|-----------|---------------|-------------|-------------|-----------------------|
| [M+NH4] <sup>+</sup> | 1506511.36         | 455.25742 | 455.25771     | 0.28895     | 0.63        | --                    |
| [M+Na] <sup>+</sup>  | 101743.68          | 460.21282 | 460.21217     | -0.64697    | -1.41       | --                    |
| [M+K] <sup>+</sup>   | 41807.72           | 476.18675 | 476.18622     | -0.52749    | -1.11       | --                    |

<sup>1</sup>H NMR compound 7

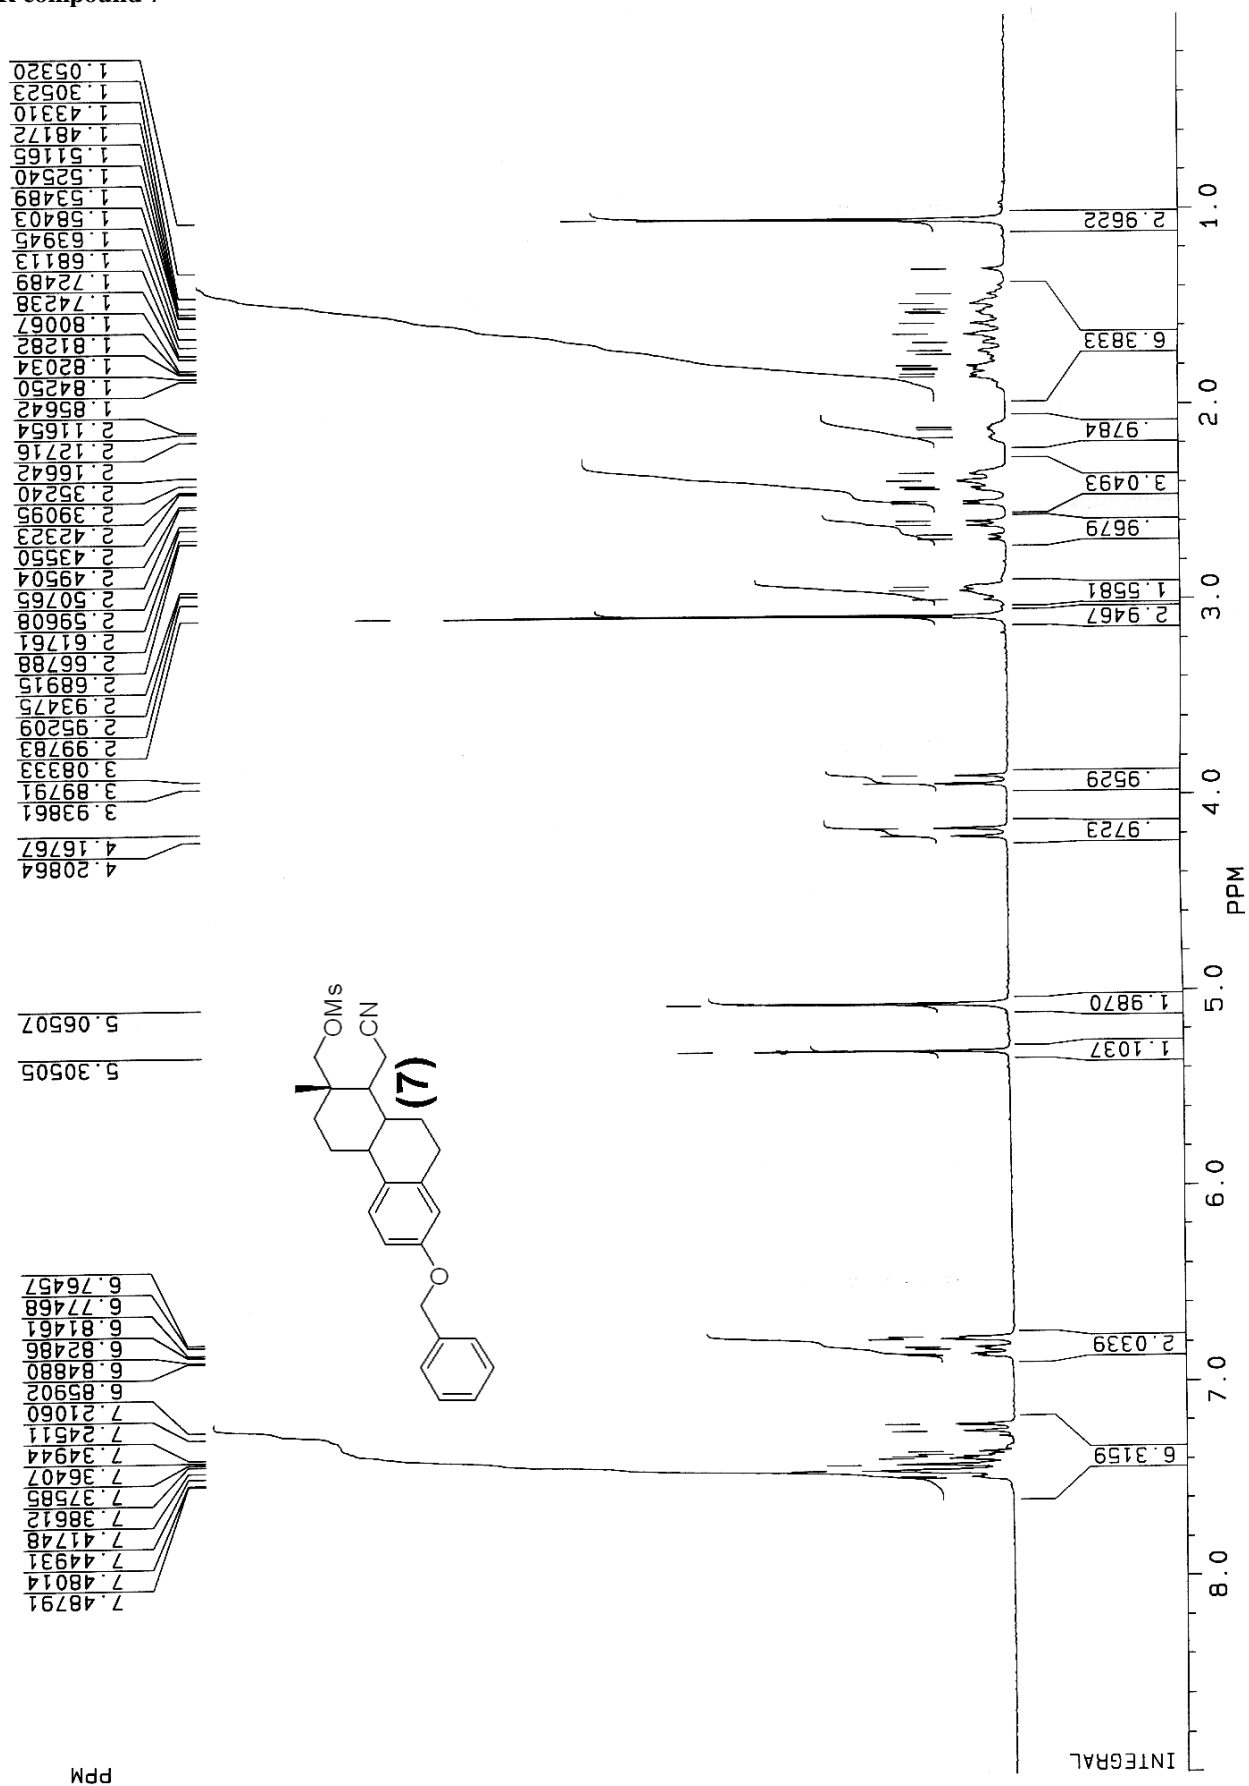

<sup>13</sup>C NMR compound 7

|        |
|--------|
| 15.867 |
| 19.059 |
| 26.074 |
| 26.986 |
| 29.794 |
| 31.204 |
| 37.027 |
| 38.515 |
| 39.455 |
| 42.576 |
| 44.336 |

|        |
|--------|
| 69.941 |
| 76.488 |
| 76.999 |
| 77.504 |

|         |
|---------|
| 112.773 |
| 114.444 |
| 117.117 |
| 118.385 |
| 126.331 |
| 127.415 |
| 127.885 |
| 128.544 |
| 131.278 |
| 137.104 |
| 137.276 |

|         |
|---------|
| 157.059 |
|---------|

PPM

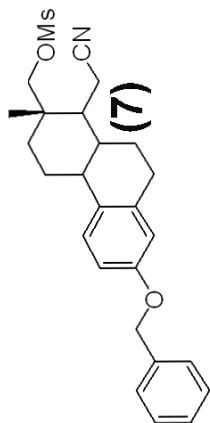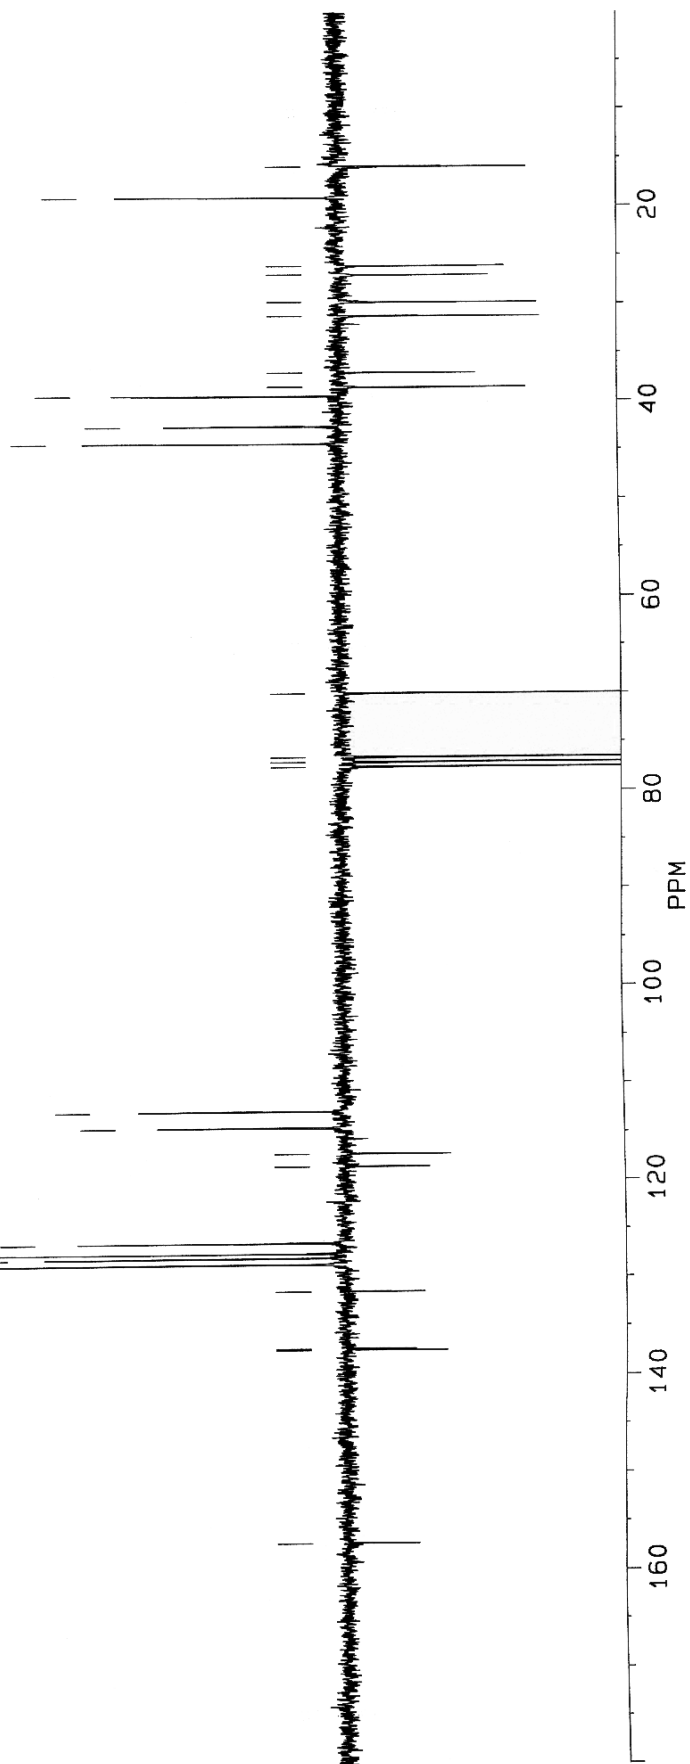

IR compound 7

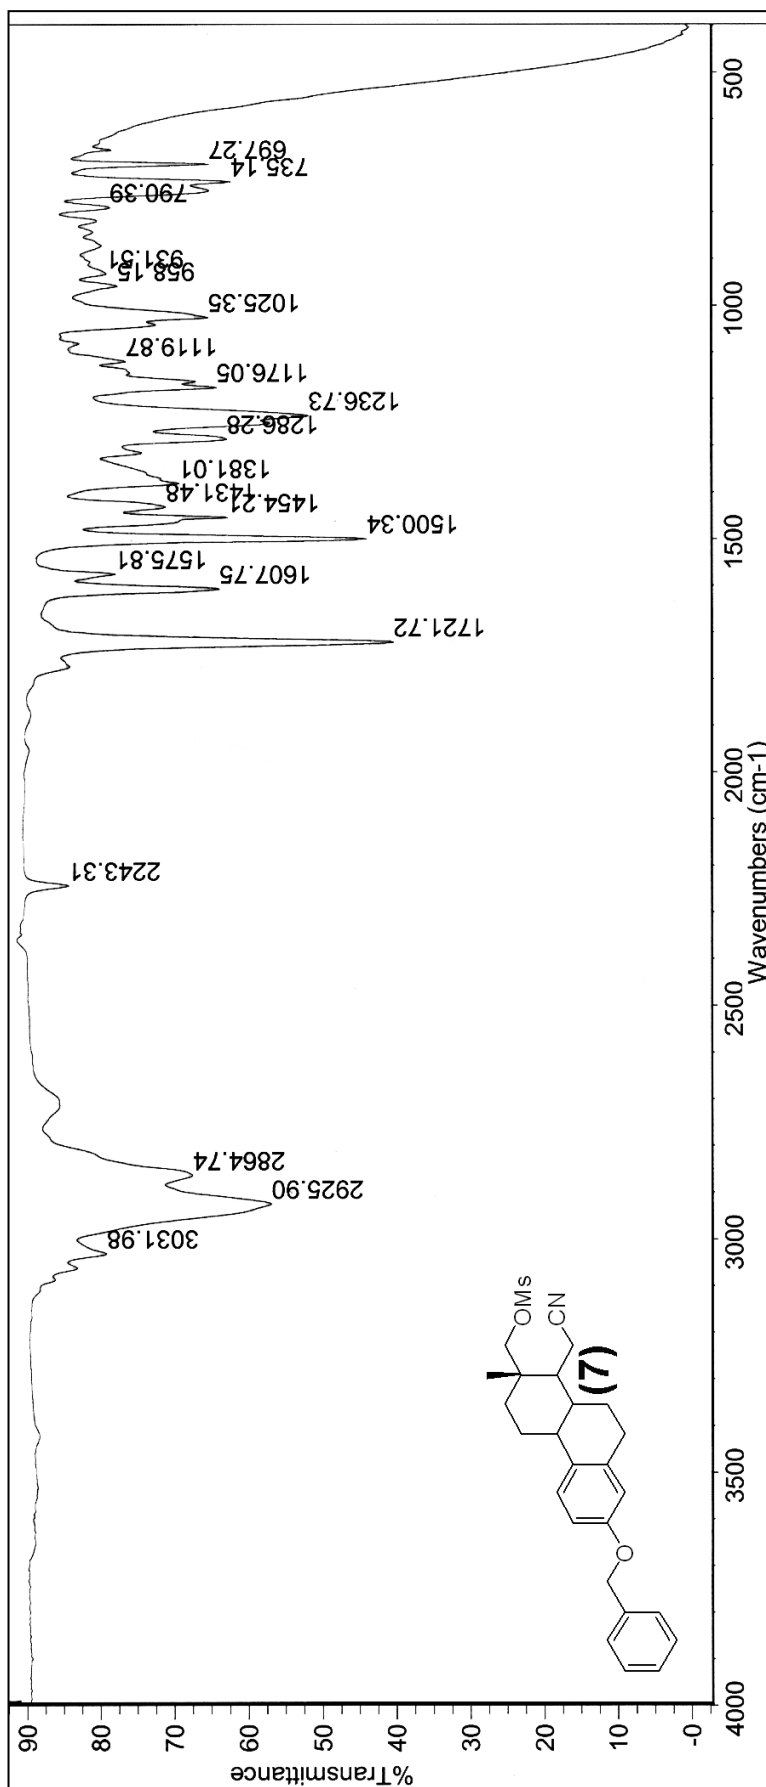



HRMS compound 7

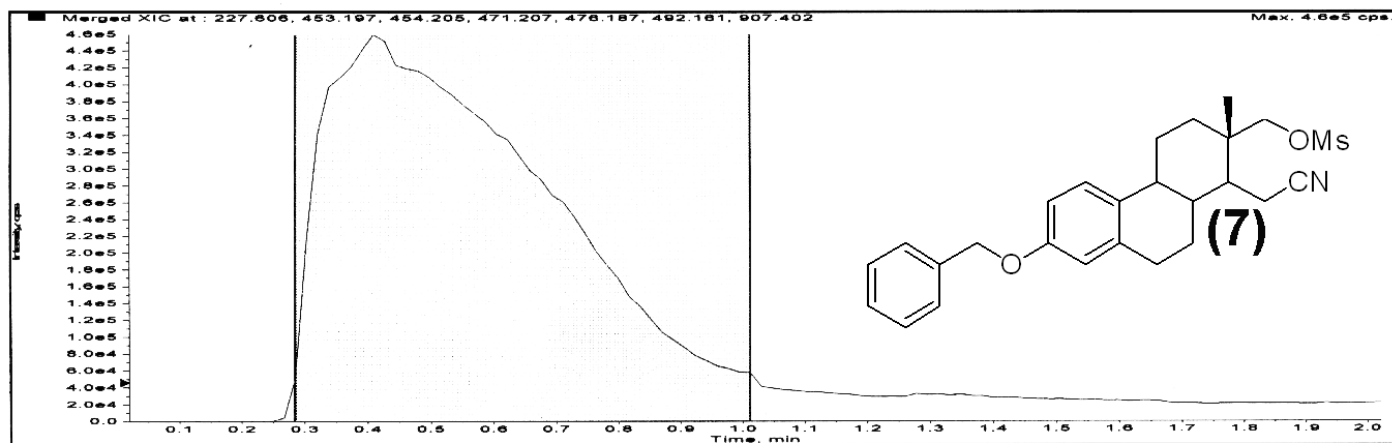

Merged XIC, Period#: 1 Experiment#: 1

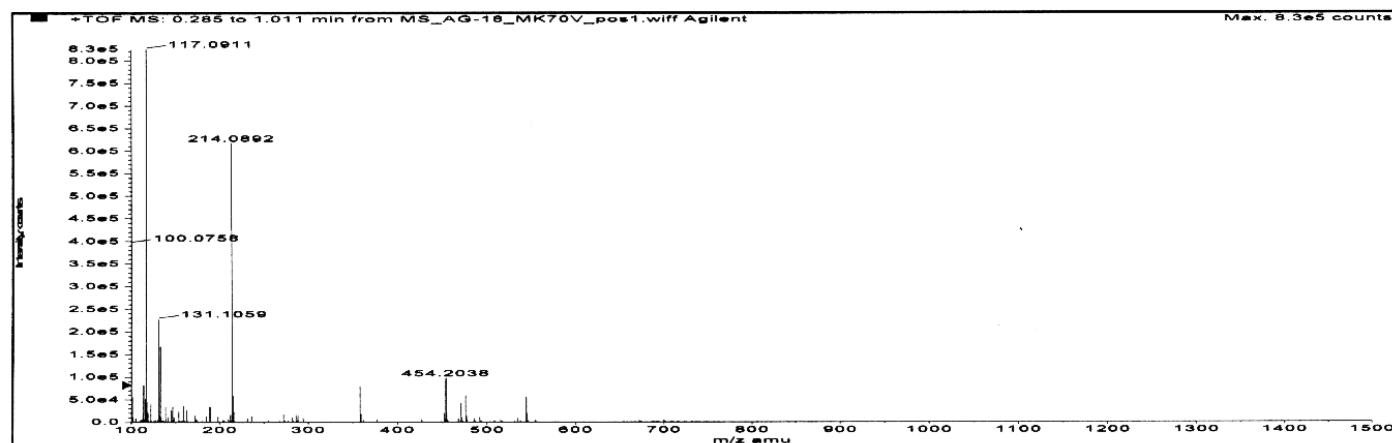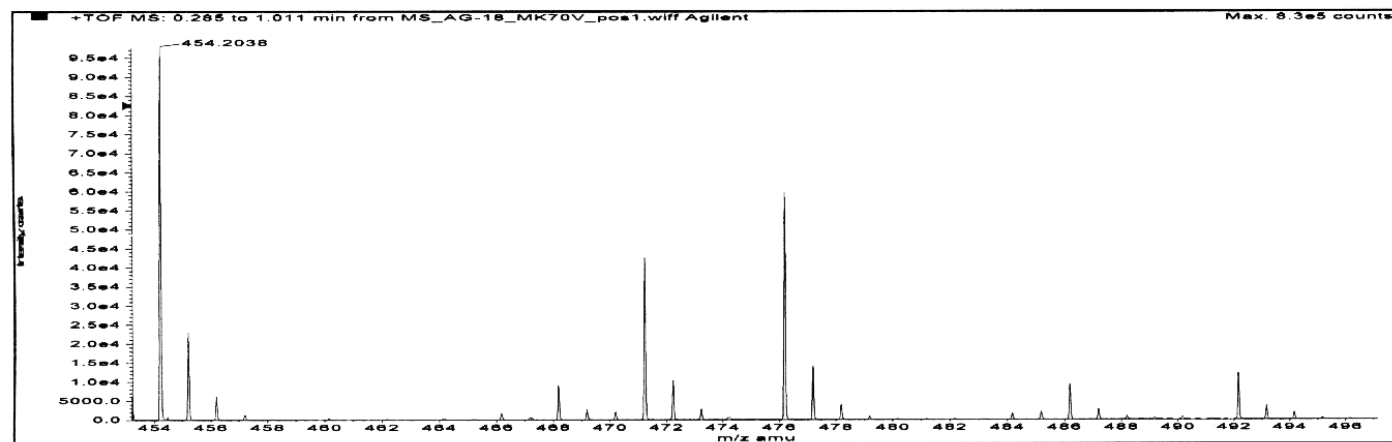

| Formula                                           | Compound name | Mass      | Peak RT (min) | Peak area  | Description |
|---------------------------------------------------|---------------|-----------|---------------|------------|-------------|
| C <sub>26</sub> H <sub>31</sub> NO <sub>4</sub> S | –             | 453.19738 | 0.41          | 1.10939 E7 | –           |

| Species                           | Abundance (counts) | Ion Mass  | Measured Mass | Error (mDa) | Error (ppm) | Ret. Time Error (min) |
|-----------------------------------|--------------------|-----------|---------------|-------------|-------------|-----------------------|
| [M+H] <sup>+</sup>                | 97819.58           | 454.20466 | 454.20379     | -0.87045    | -1.92       | –                     |
| [M+H <sub>2</sub> O] <sup>+</sup> | 43592.36           | 471.20740 | 471.23037     | 22.97597    | 48.76       | –                     |
| [M+Na] <sup>+</sup>               | 63483.87           | 476.18660 | 476.18609     | -0.50555    | -1.06       | –                     |
| [M+K] <sup>+</sup>                | 13153.07           | 492.16054 | 492.16071     | 0.17467     | 0.35        | –                     |

### **<sup>1</sup>H NMR compound 8**

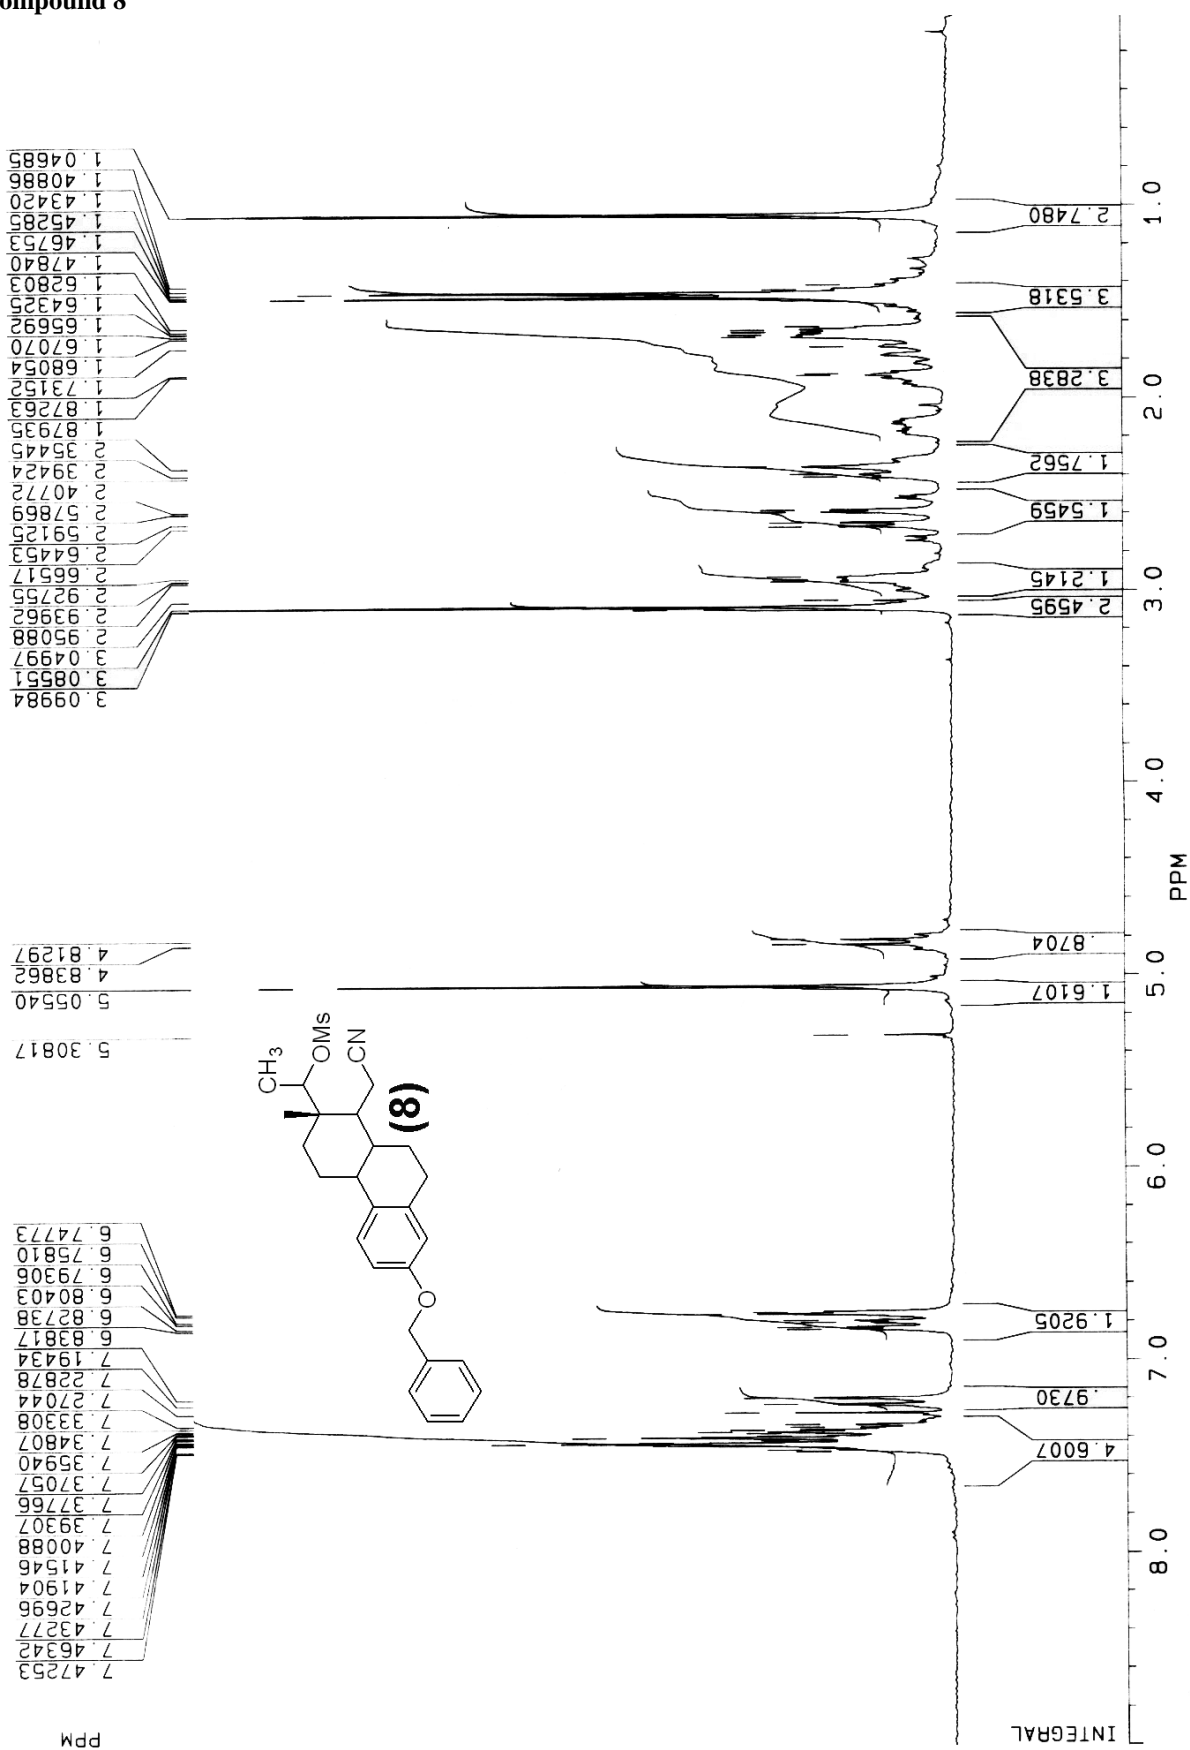

<sup>13</sup>C NMR compound 8

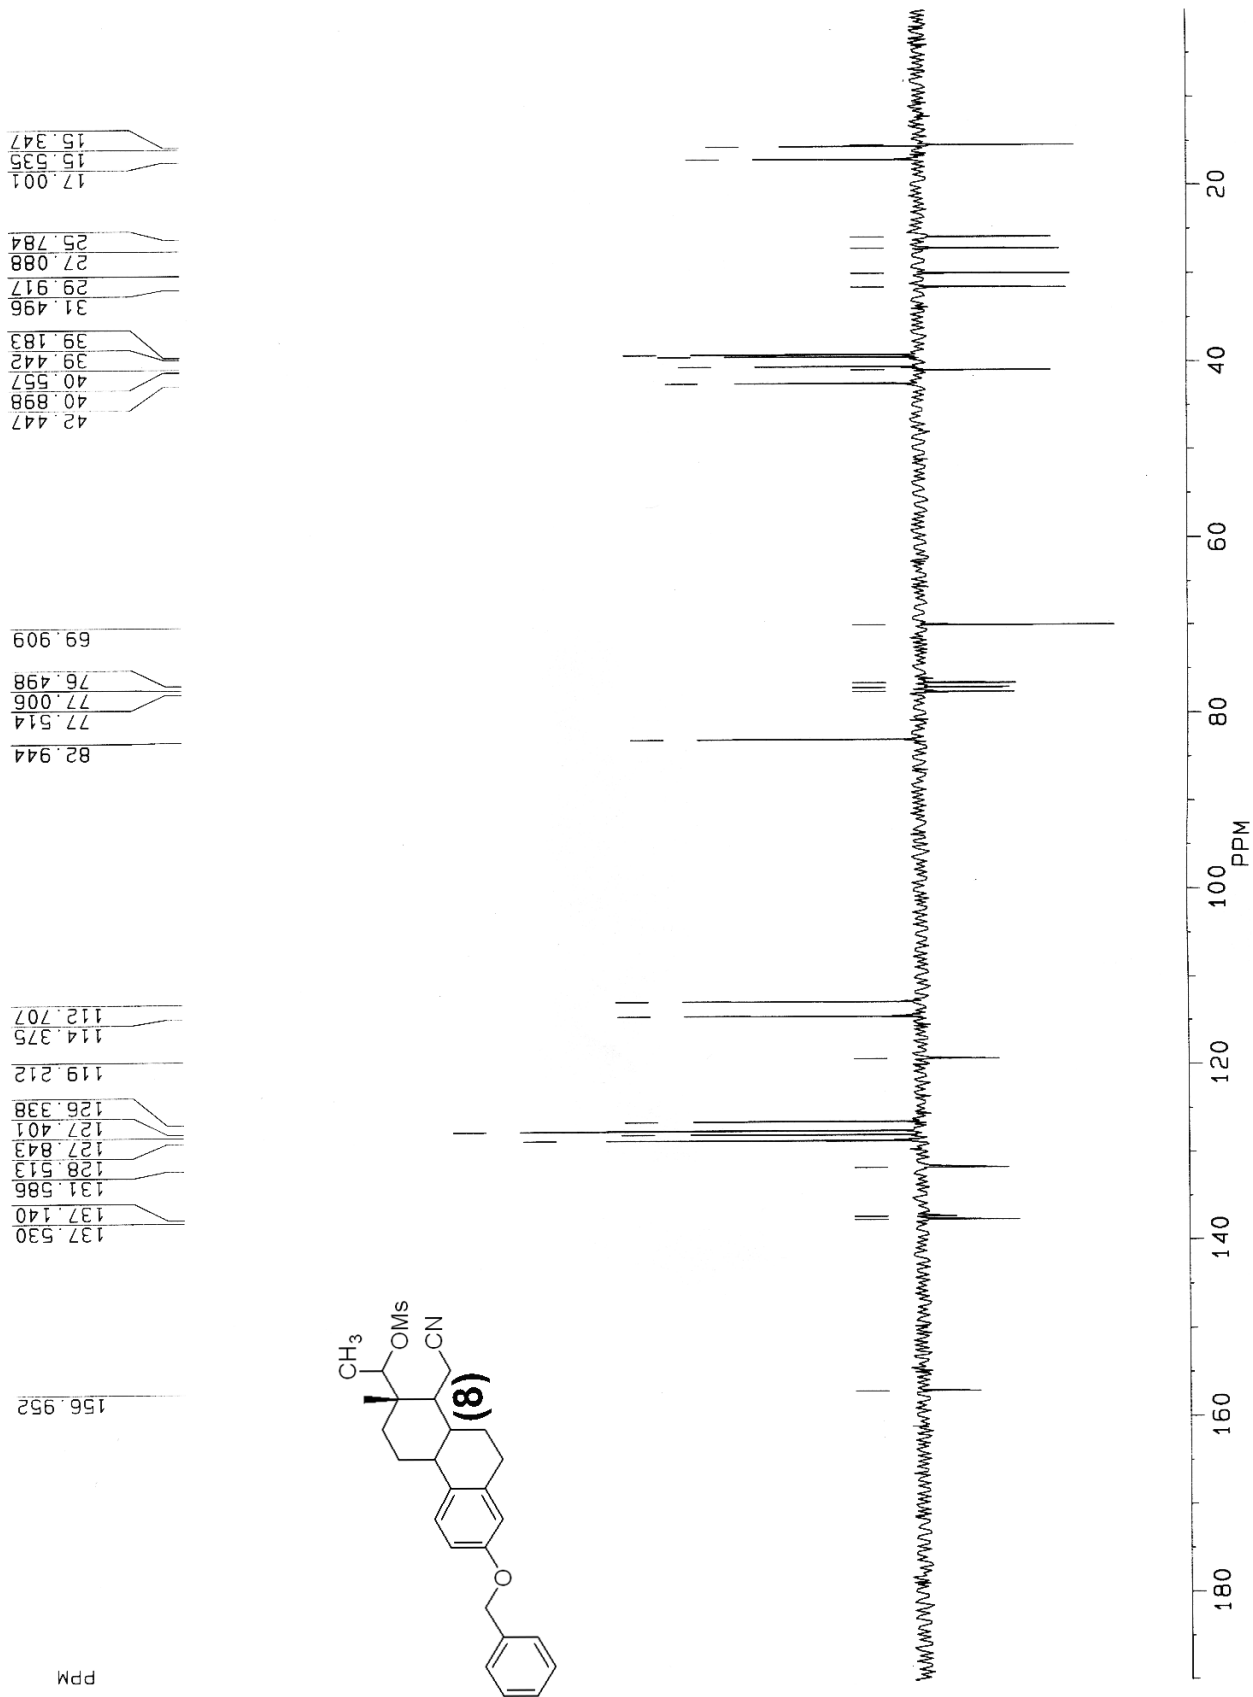

IR compound 8

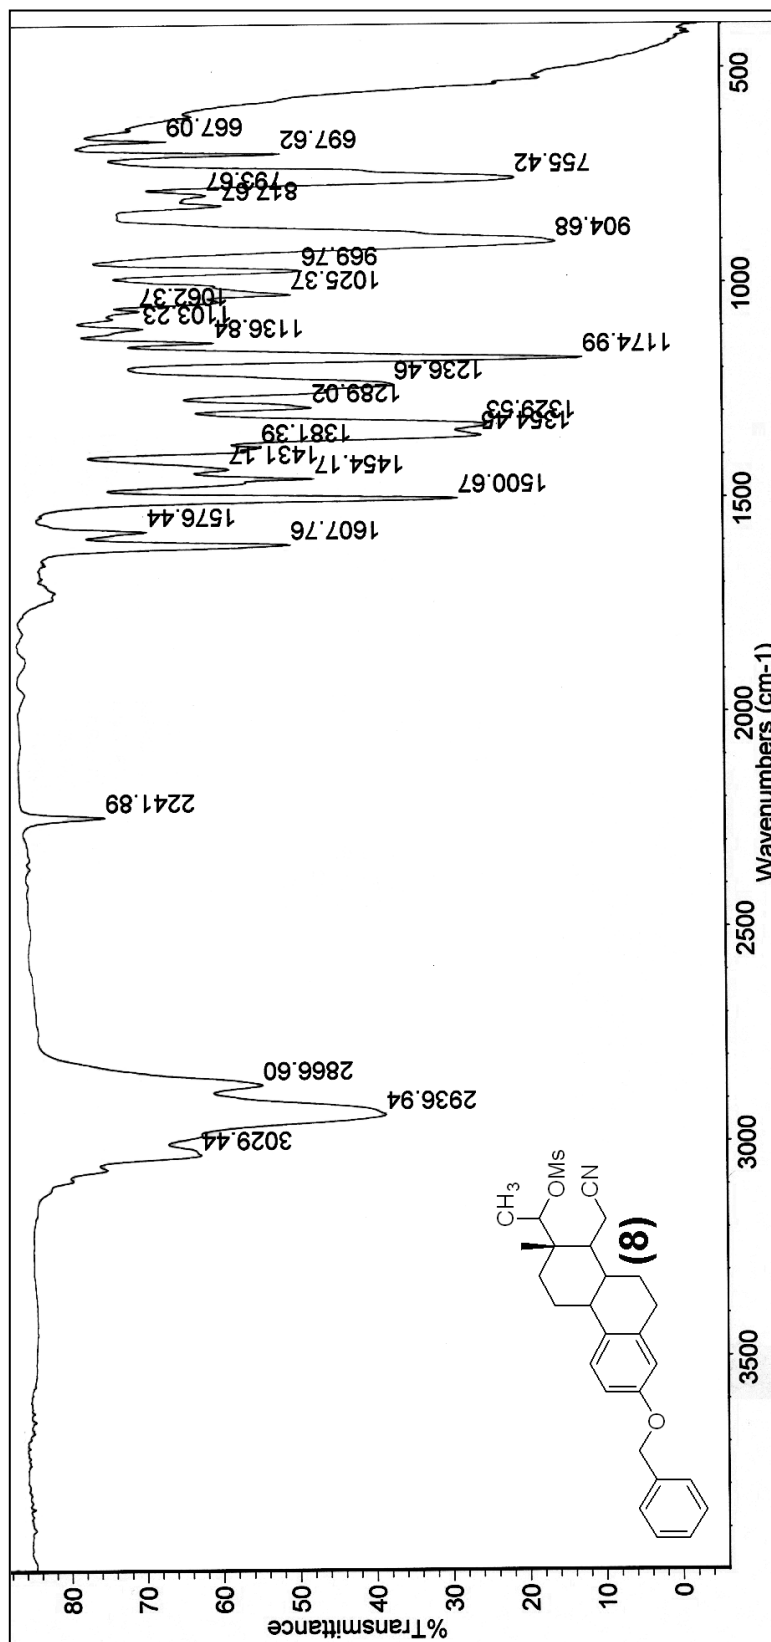

HRMS compound 8

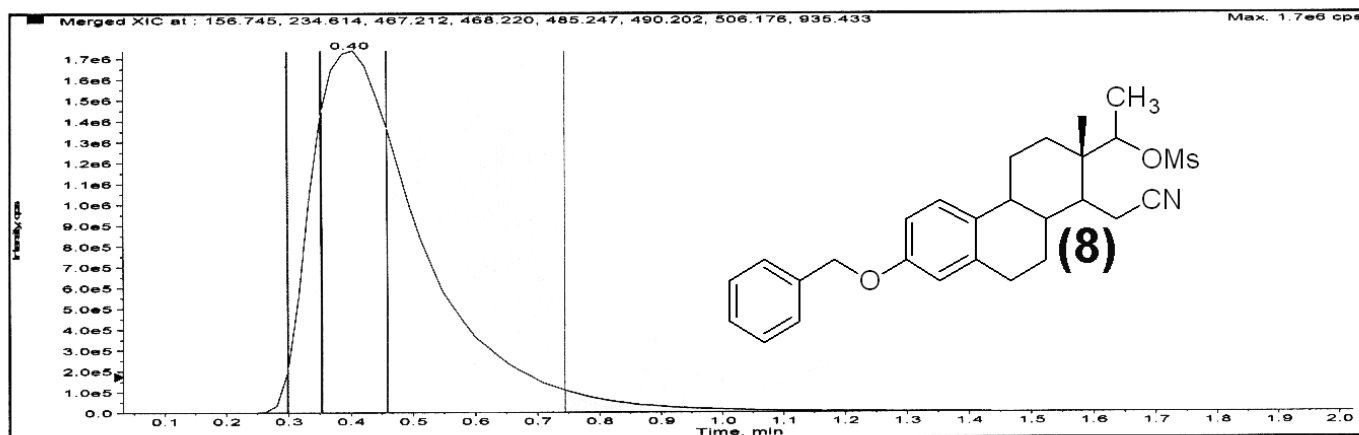

Merged XIC, Period# : 1 Experiment# : 1

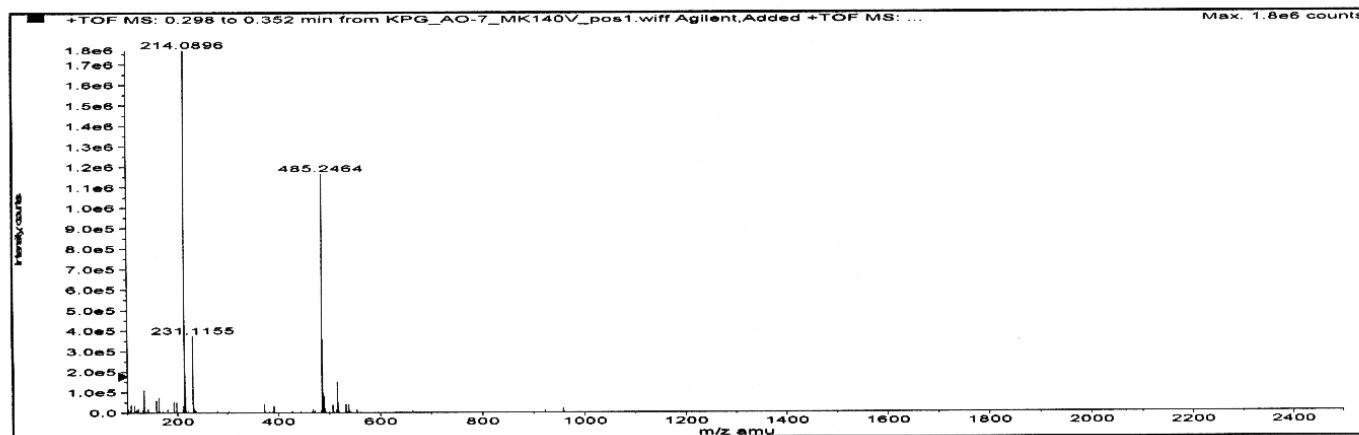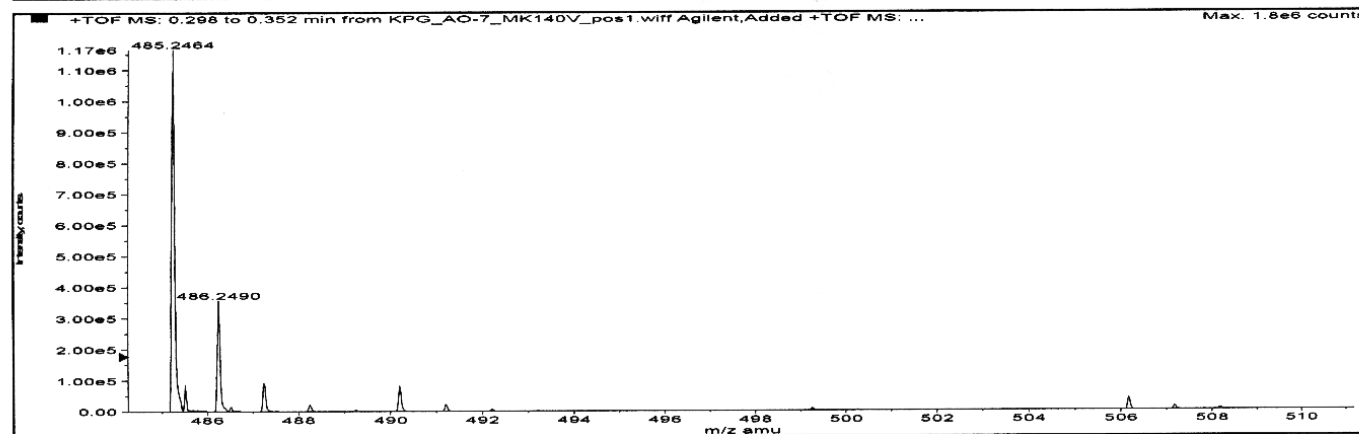

| Formula                                           | Compound name | Mass      | Peak RT (min) | Peak area  | Description |
|---------------------------------------------------|---------------|-----------|---------------|------------|-------------|
| C <sub>27</sub> H <sub>33</sub> NO <sub>4</sub> S | --            | 467.21303 | 0.40          | 2.17886 E7 | --          |

| Species                           | Abundance (counts) | Ion Mass  | Measured Mass | Error (mDa) | Error (ppm) | Ret. Time Error (min) |
|-----------------------------------|--------------------|-----------|---------------|-------------|-------------|-----------------------|
| [M+NH <sub>4</sub> ] <sup>+</sup> | 1190903.28         | 485.24685 | 485.24641     | -0.44412    | -0.92       | --                    |
| [M+Na] <sup>+</sup>               | 83346.34           | 490.20225 | 490.20169     | -0.55585    | -1.13       | --                    |
| [M+K] <sup>+</sup>                | 41684.97           | 506.17619 | 506.17534     | -0.84262    | -1.66       | --                    |

<sup>1</sup>H NMR compound 10

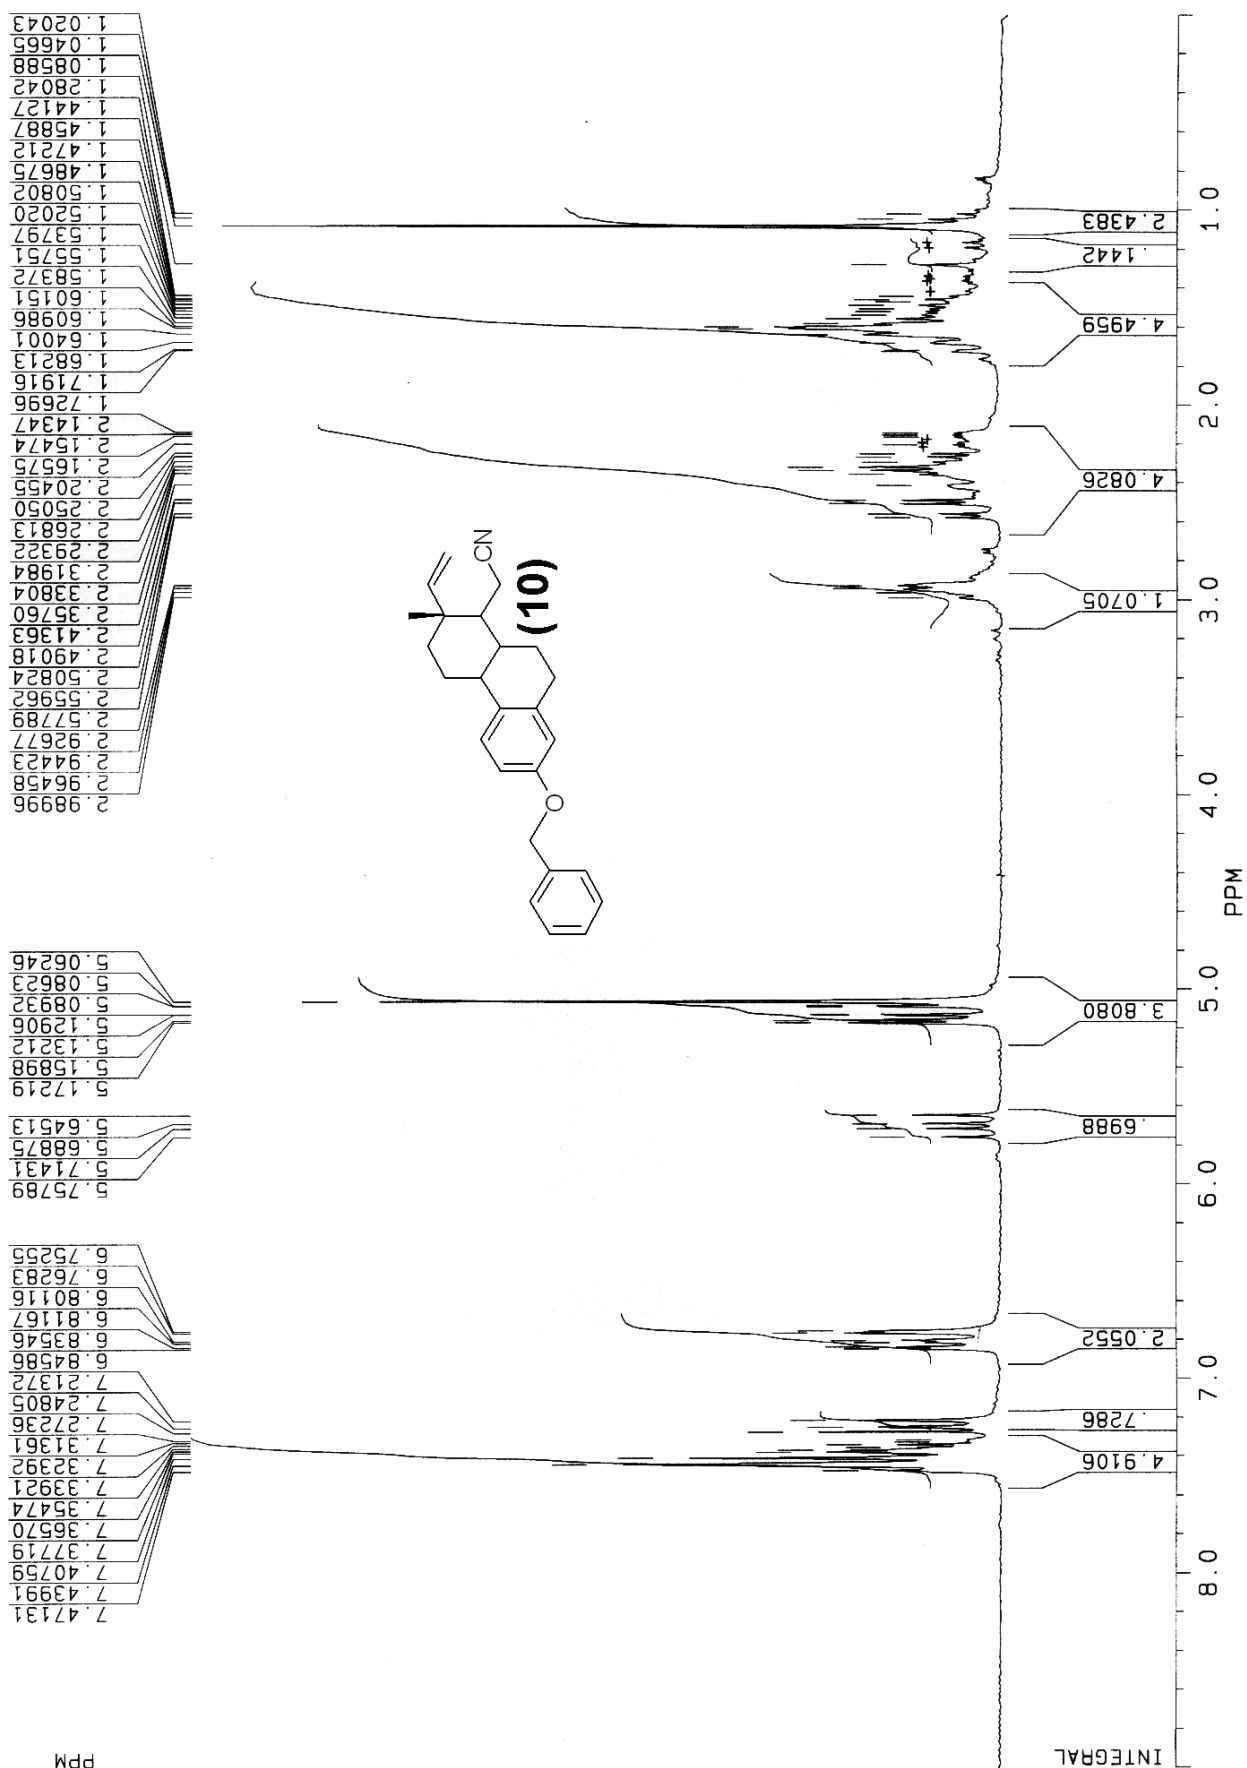

<sup>13</sup>C NMR compound 10

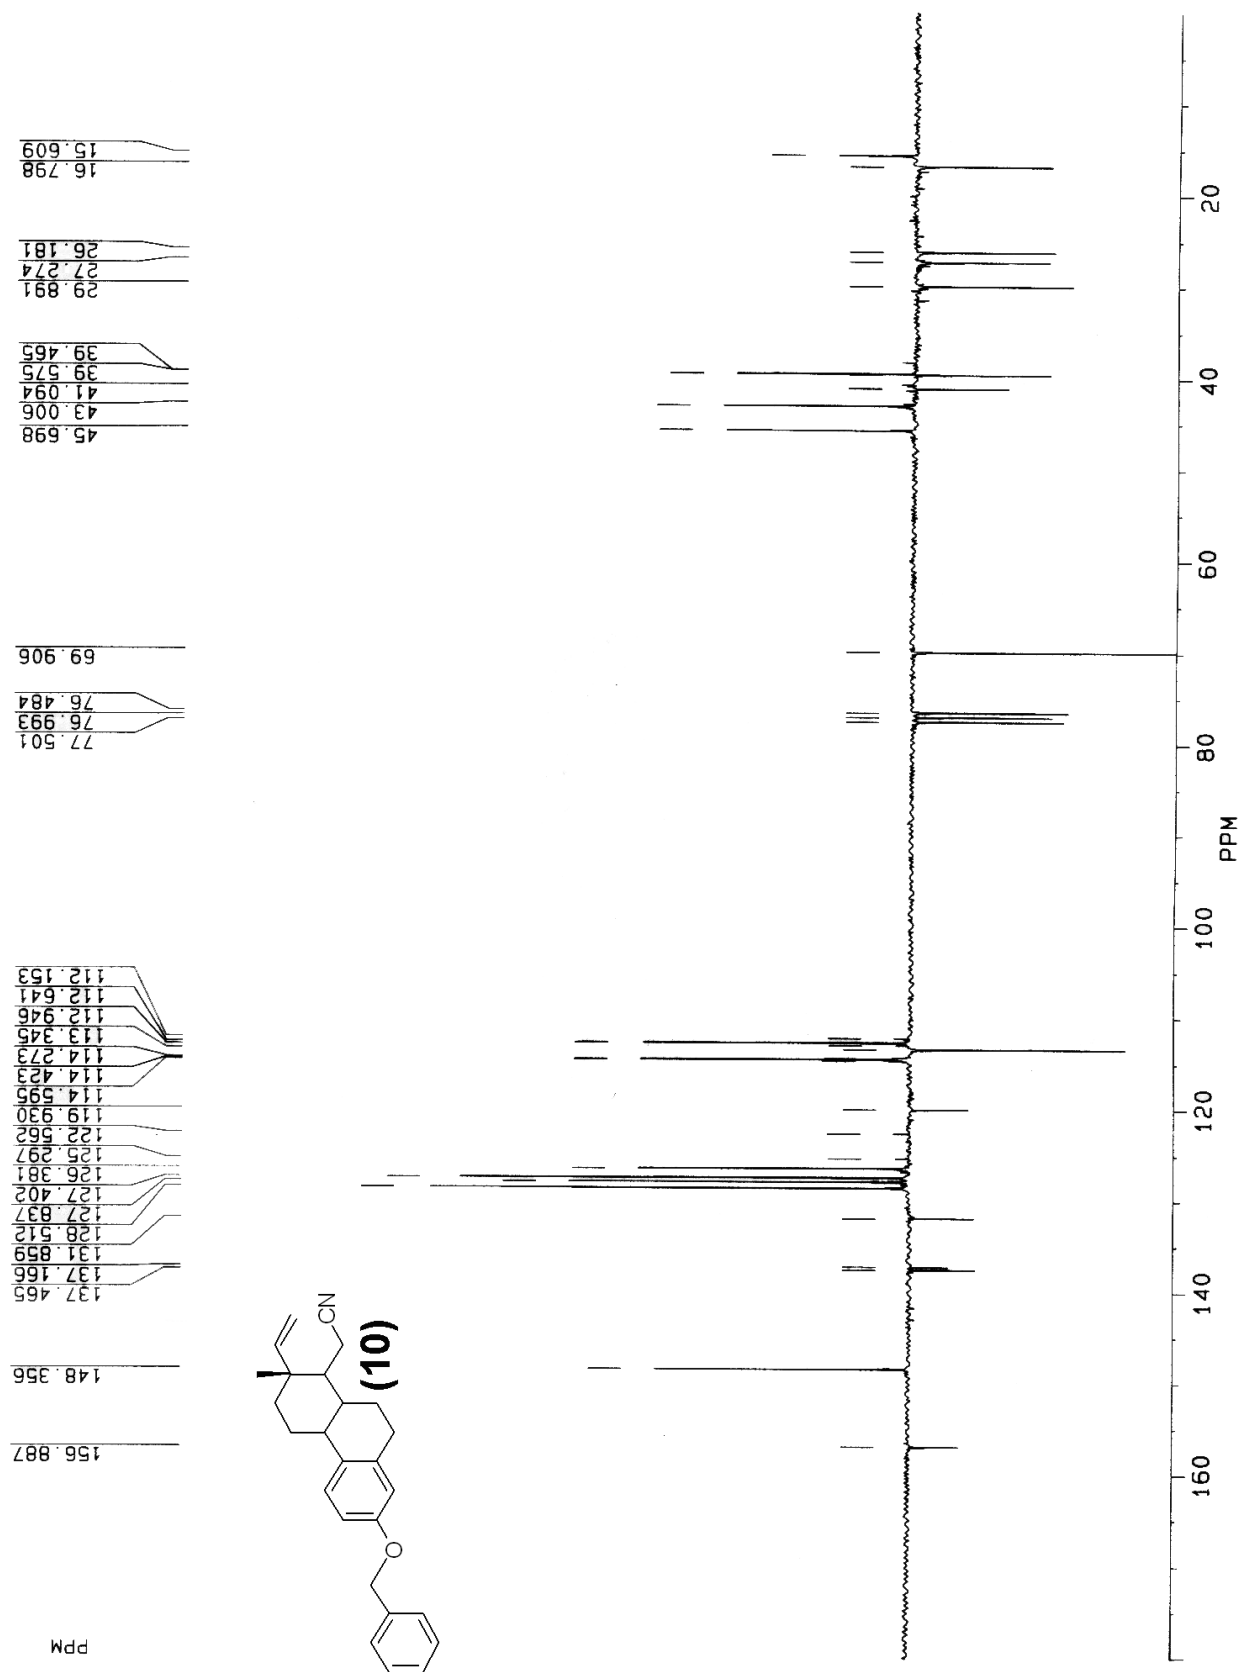

IR compound 10

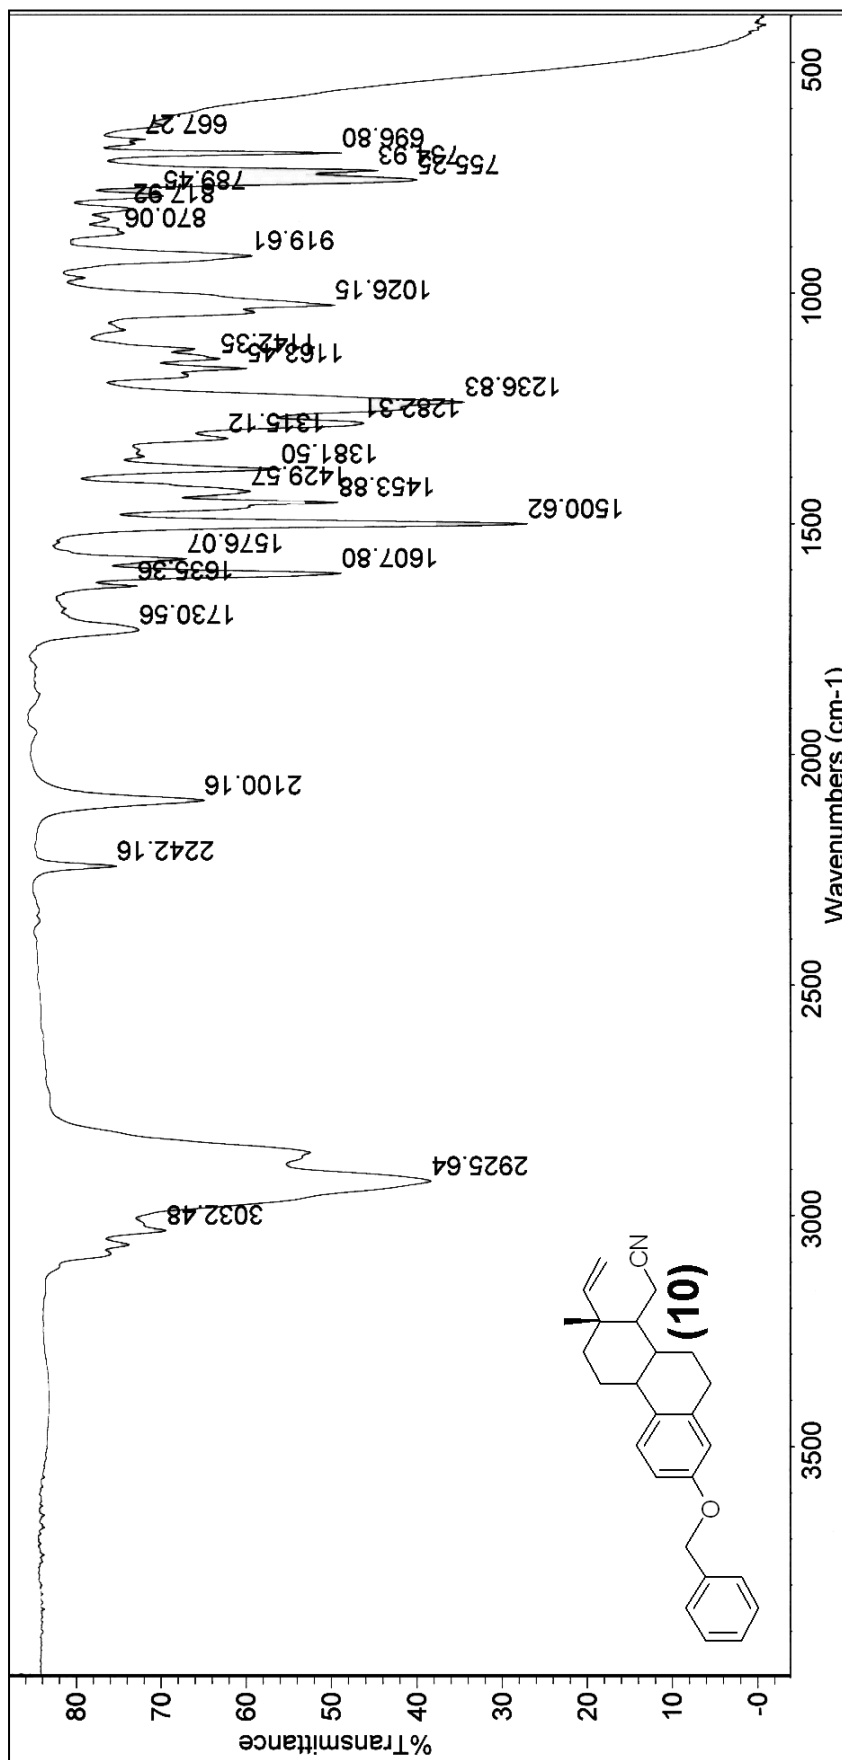



HRMS compound 10

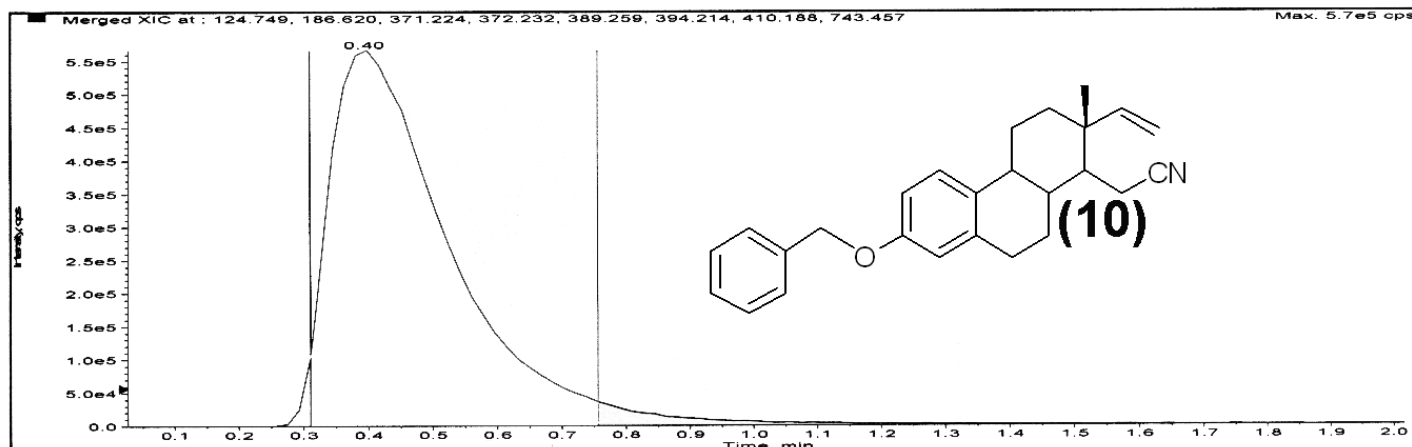

Merged XIC, Period# : 1 Experiment# : 1

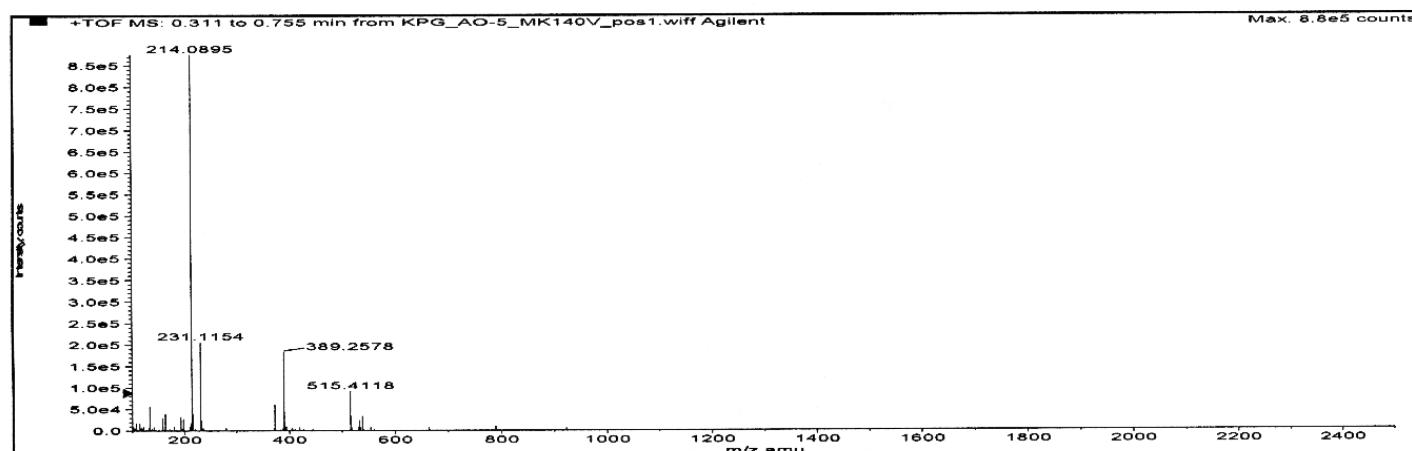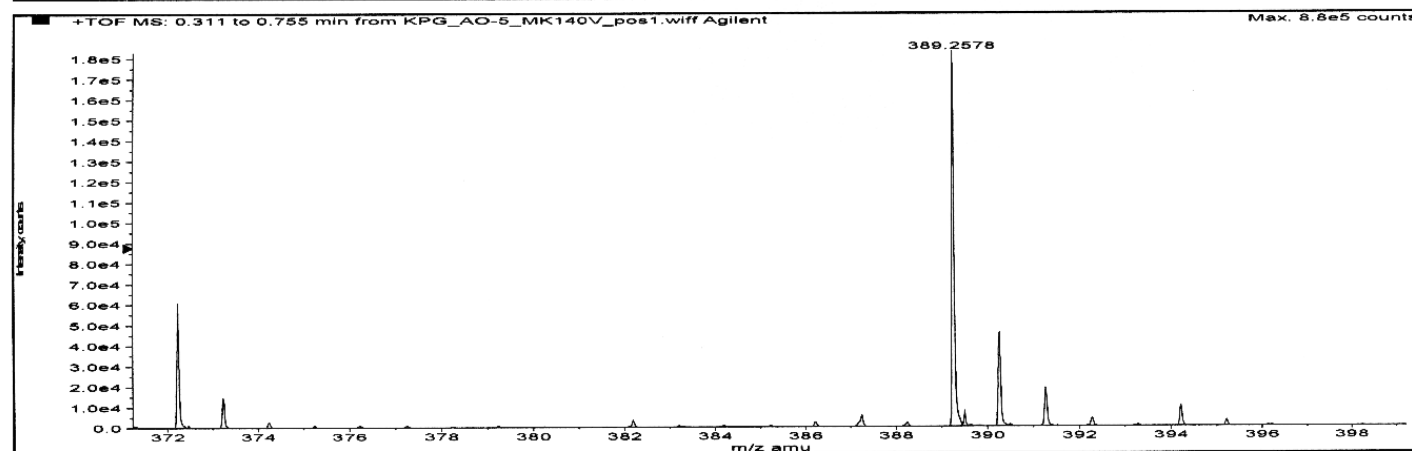

| Formula  | Compound name | Mass      | Peak RT (min) | Peak area  | Description |
|----------|---------------|-----------|---------------|------------|-------------|
| C26H29NO | --            | 371.22491 | 0.40          | 7.32390 E6 | --          |

| Species              | Abundance (counts) | Ion Mass  | Measured Mass | Error (mDa) | Error (ppm) | Ret. Time Error (min) |
|----------------------|--------------------|-----------|---------------|-------------|-------------|-----------------------|
| [M+H] <sup>+</sup>   | 61058.33           | 372.23219 | 372.23144     | -0.75094    | -2.02       | --                    |
| [M+NH4] <sup>+</sup> | 186354.32          | 389.25874 | 389.25778     | -0.95616    | -2.46       | --                    |
| [M+Na] <sup>+</sup>  | 10806.16           | 394.21414 | 394.21371     | -0.42151    | -1.07       | --                    |

<sup>1</sup>H-NMR compound 11

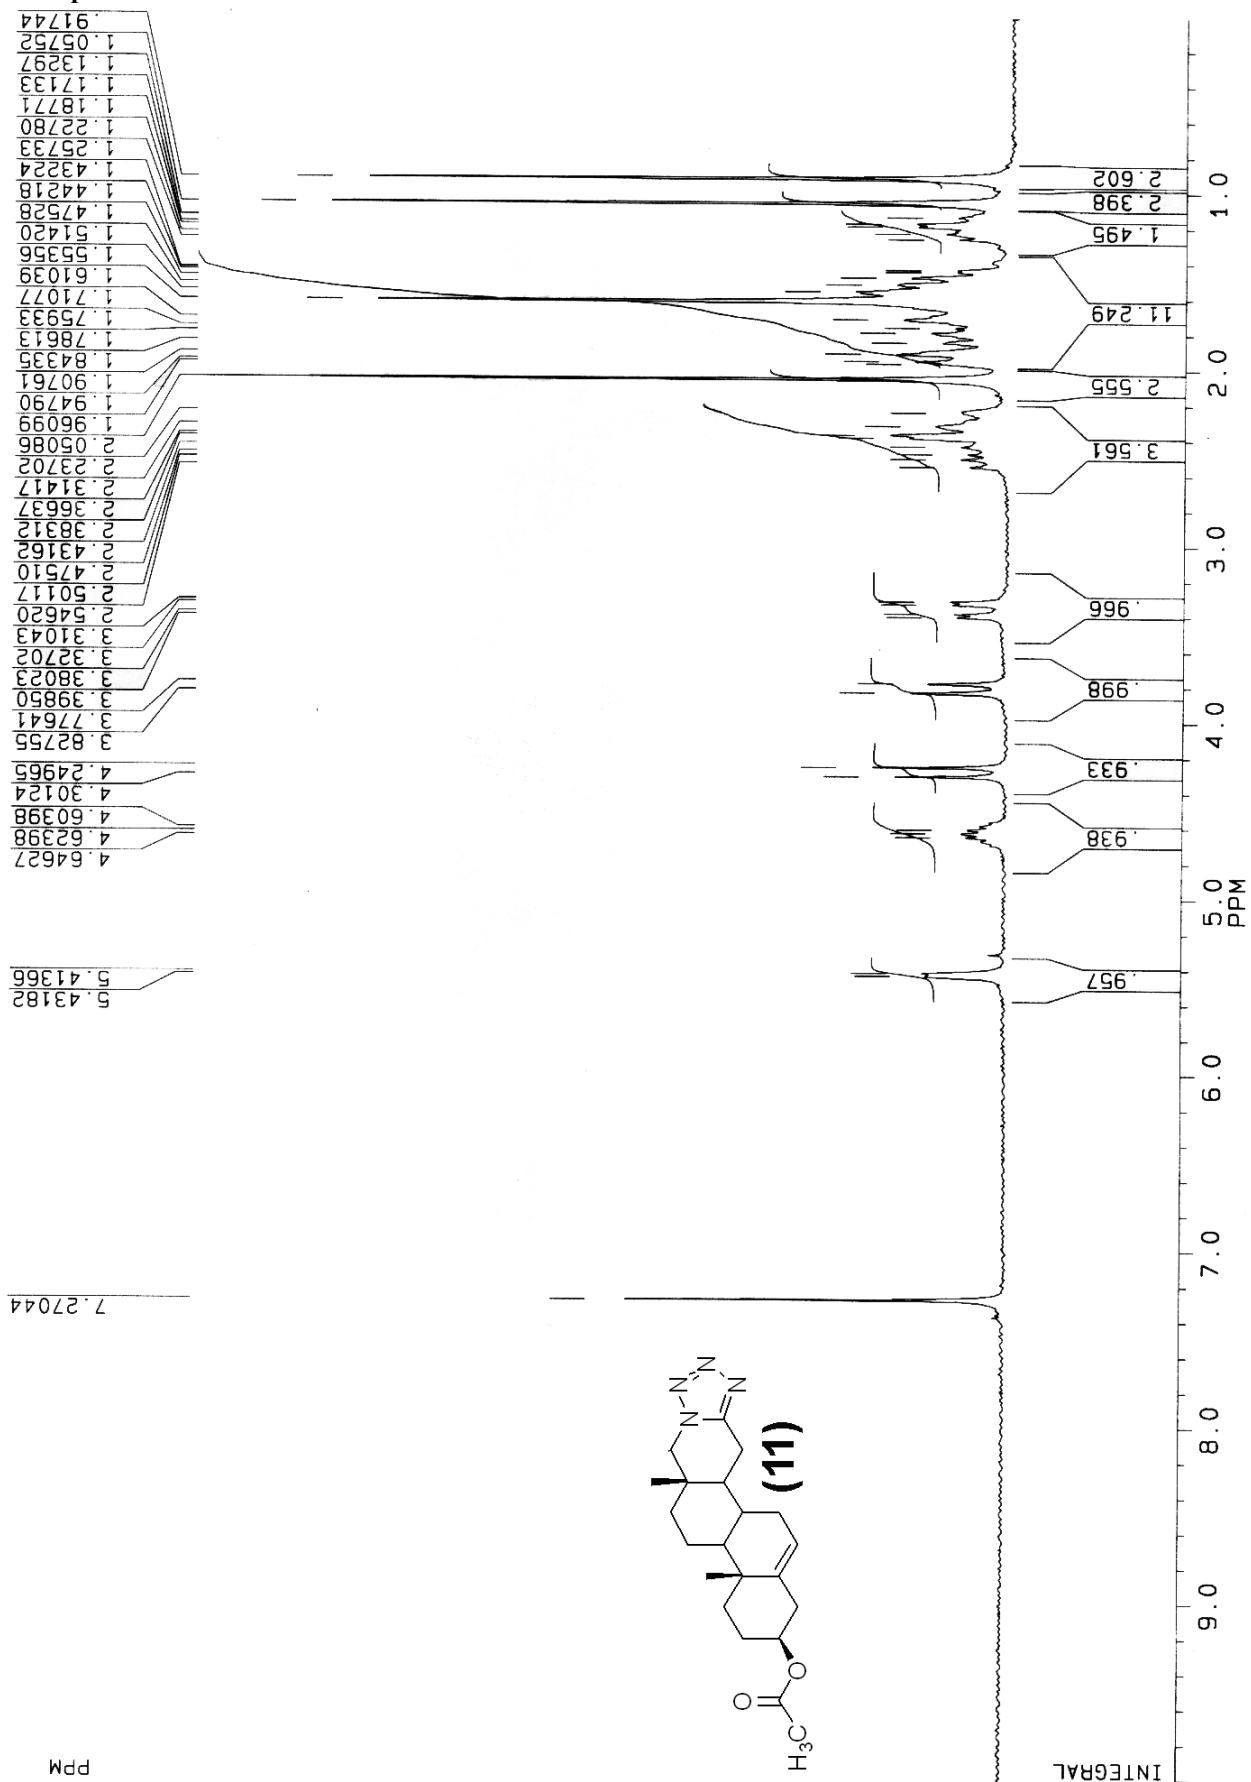

<sup>13</sup>C NMR compound 11

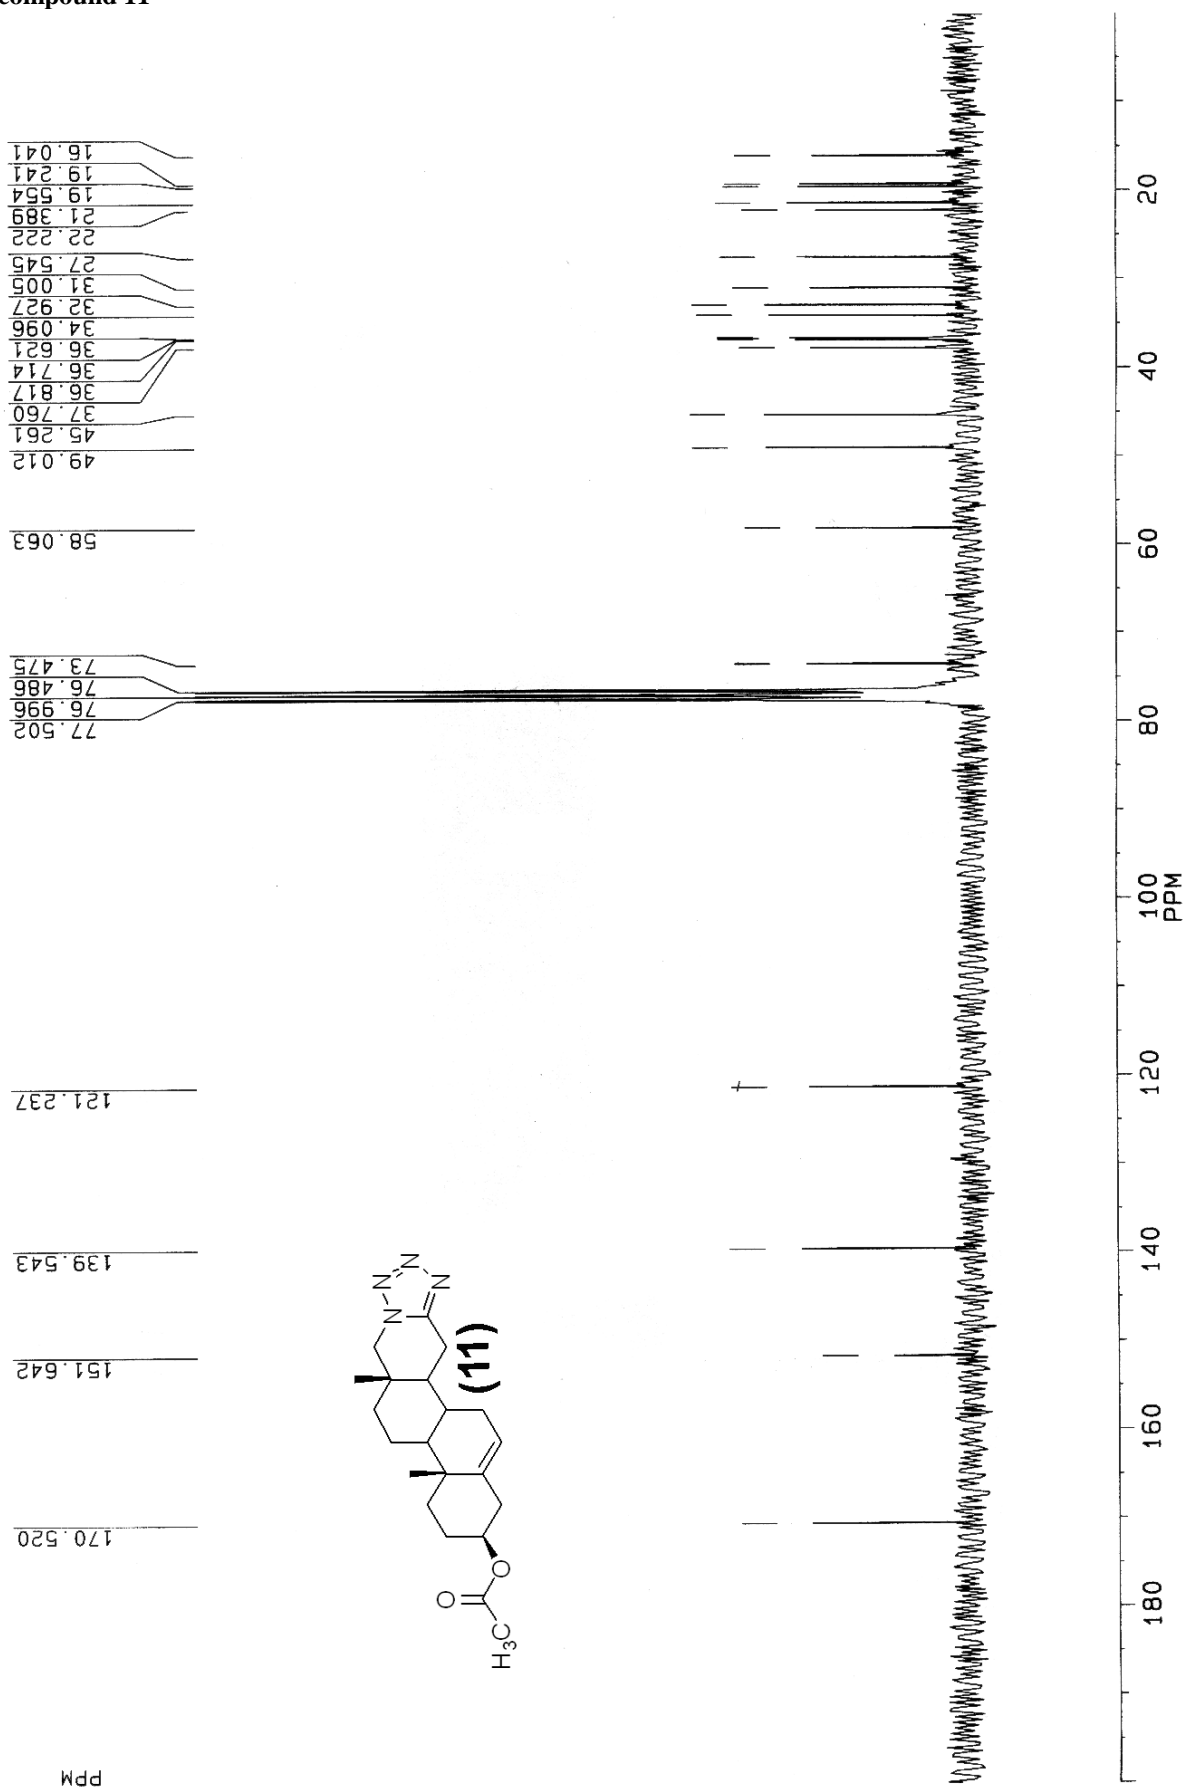

IR compound 11

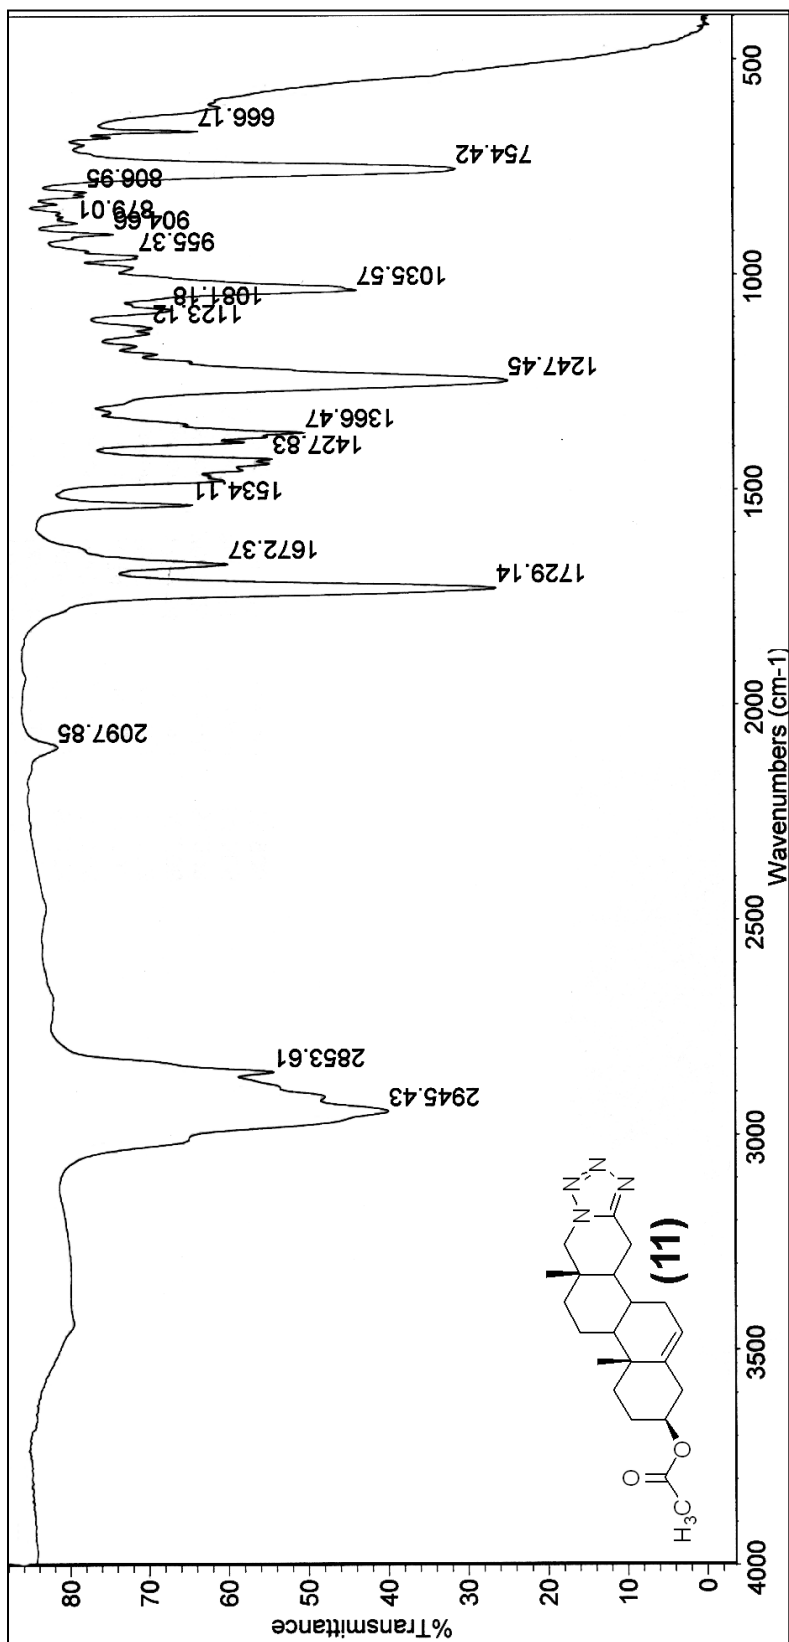

HRMS compound 11

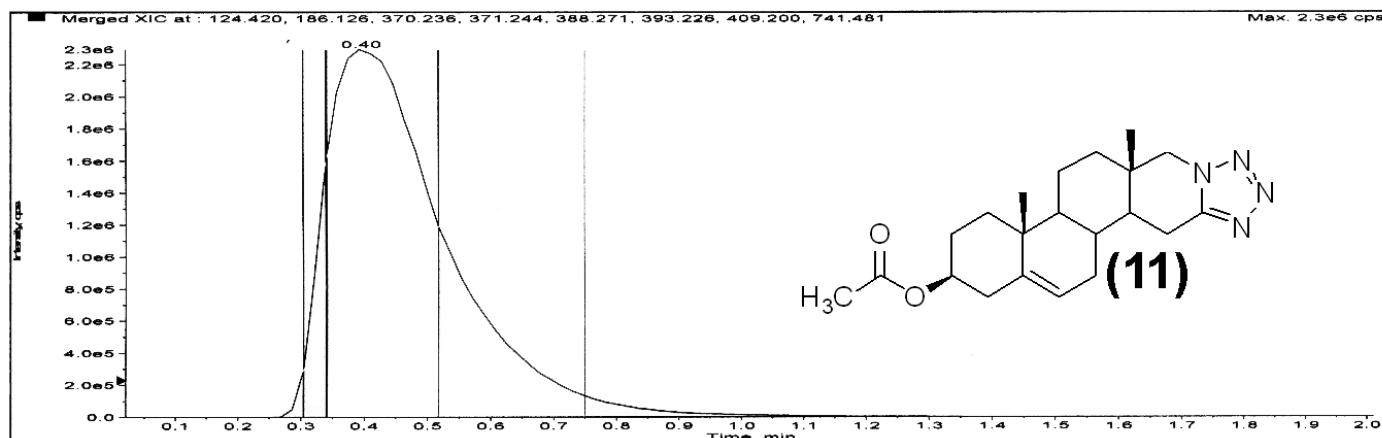

Merged XIC, Period# : 1 Experiment# : 1

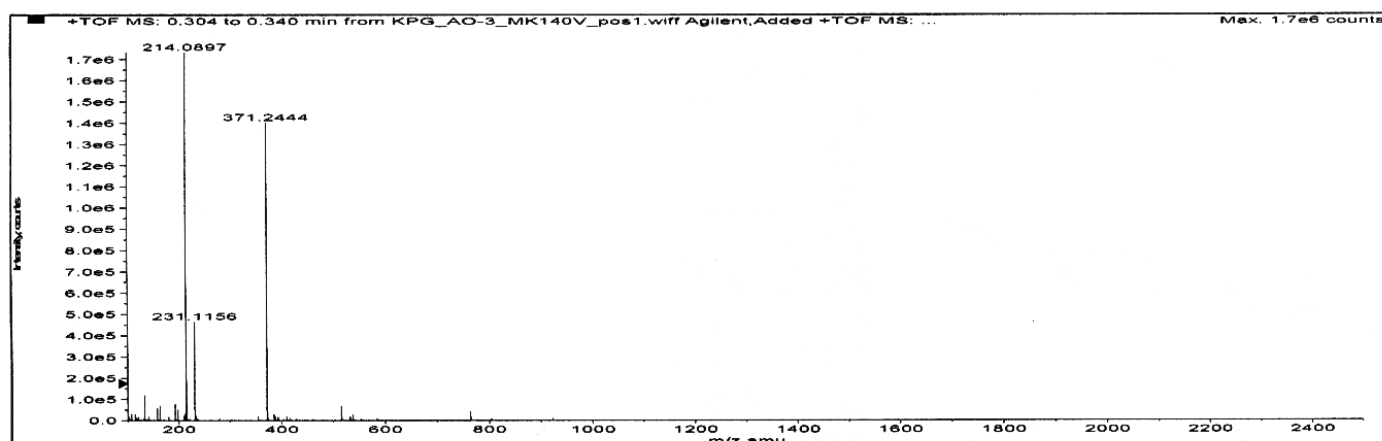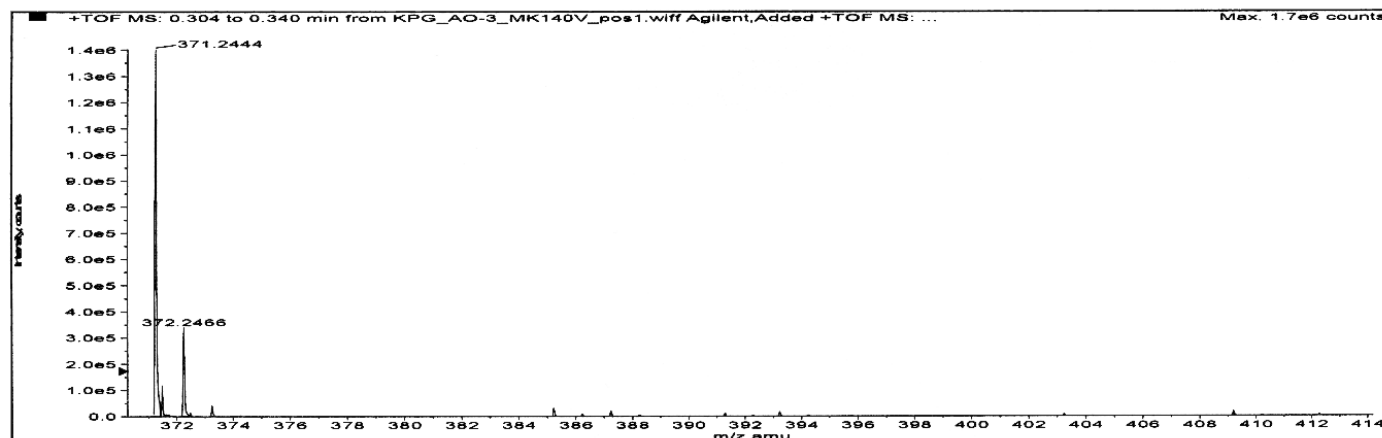

| Formula                                                       | Compound name | Mass      | Peak RT (min) | Peak area  | Description |
|---------------------------------------------------------------|---------------|-----------|---------------|------------|-------------|
| C <sub>21</sub> H <sub>30</sub> N <sub>4</sub> O <sub>2</sub> | --            | 370.23688 | 0.40          | 3.03955 E7 | --          |

| Species             | Abundance (counts) | Ion Mass  | Measured Mass | Error (mDa) | Error (ppm) | Ret. Time Error (min) |
|---------------------|--------------------|-----------|---------------|-------------|-------------|-----------------------|
| [M+H] <sup>+</sup>  | 1468803.43         | 371.24415 | 371.24438     | 0.22275     | 0.60        | --                    |
| [M+Na] <sup>+</sup> | 18249.65           | 393.22610 | 393.22639     | 0.29182     | 0.74        | --                    |
| [M+K] <sup>+</sup>  | 19375.21           | 409.20003 | 409.20001     | -0.02679    | -0.07       | --                    |

<sup>1</sup>H NMR compound 12

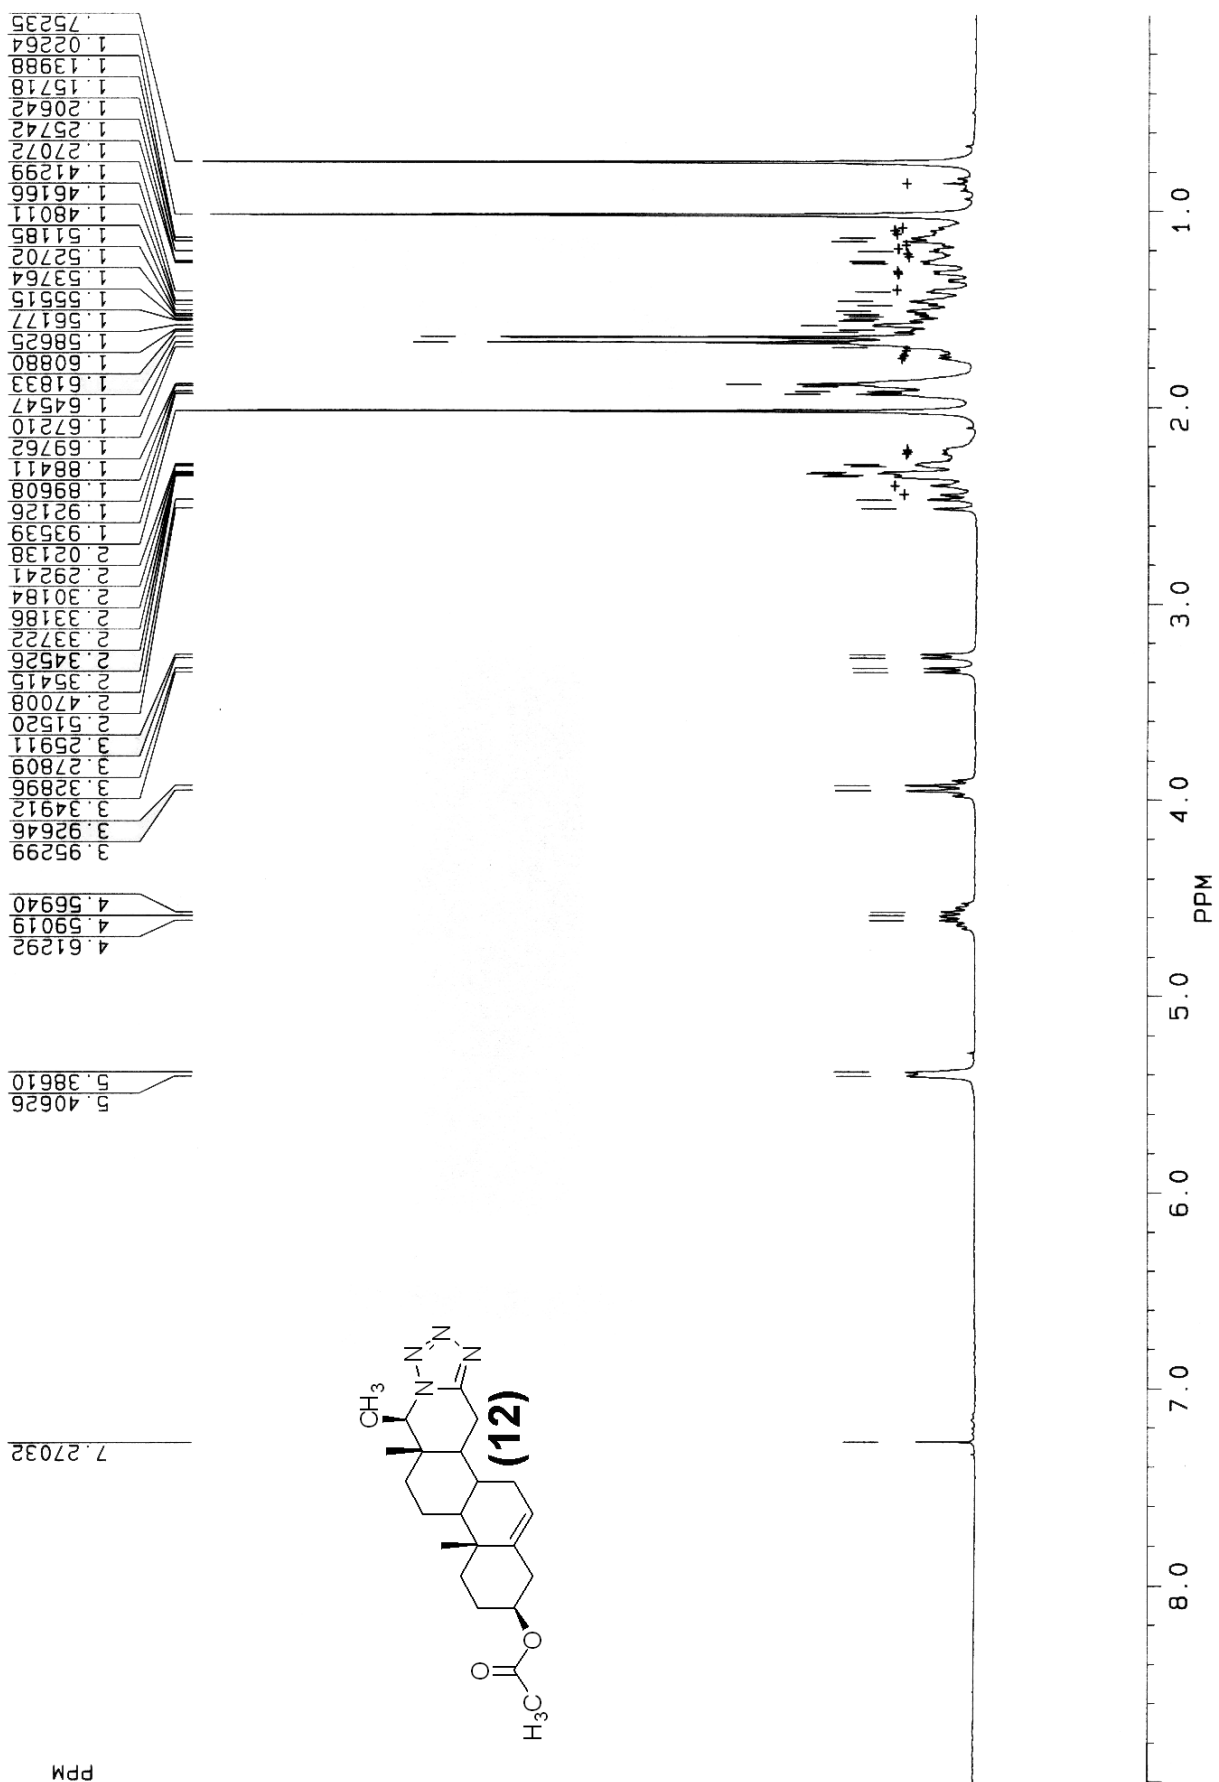

<sup>13</sup>C NMR compound 12

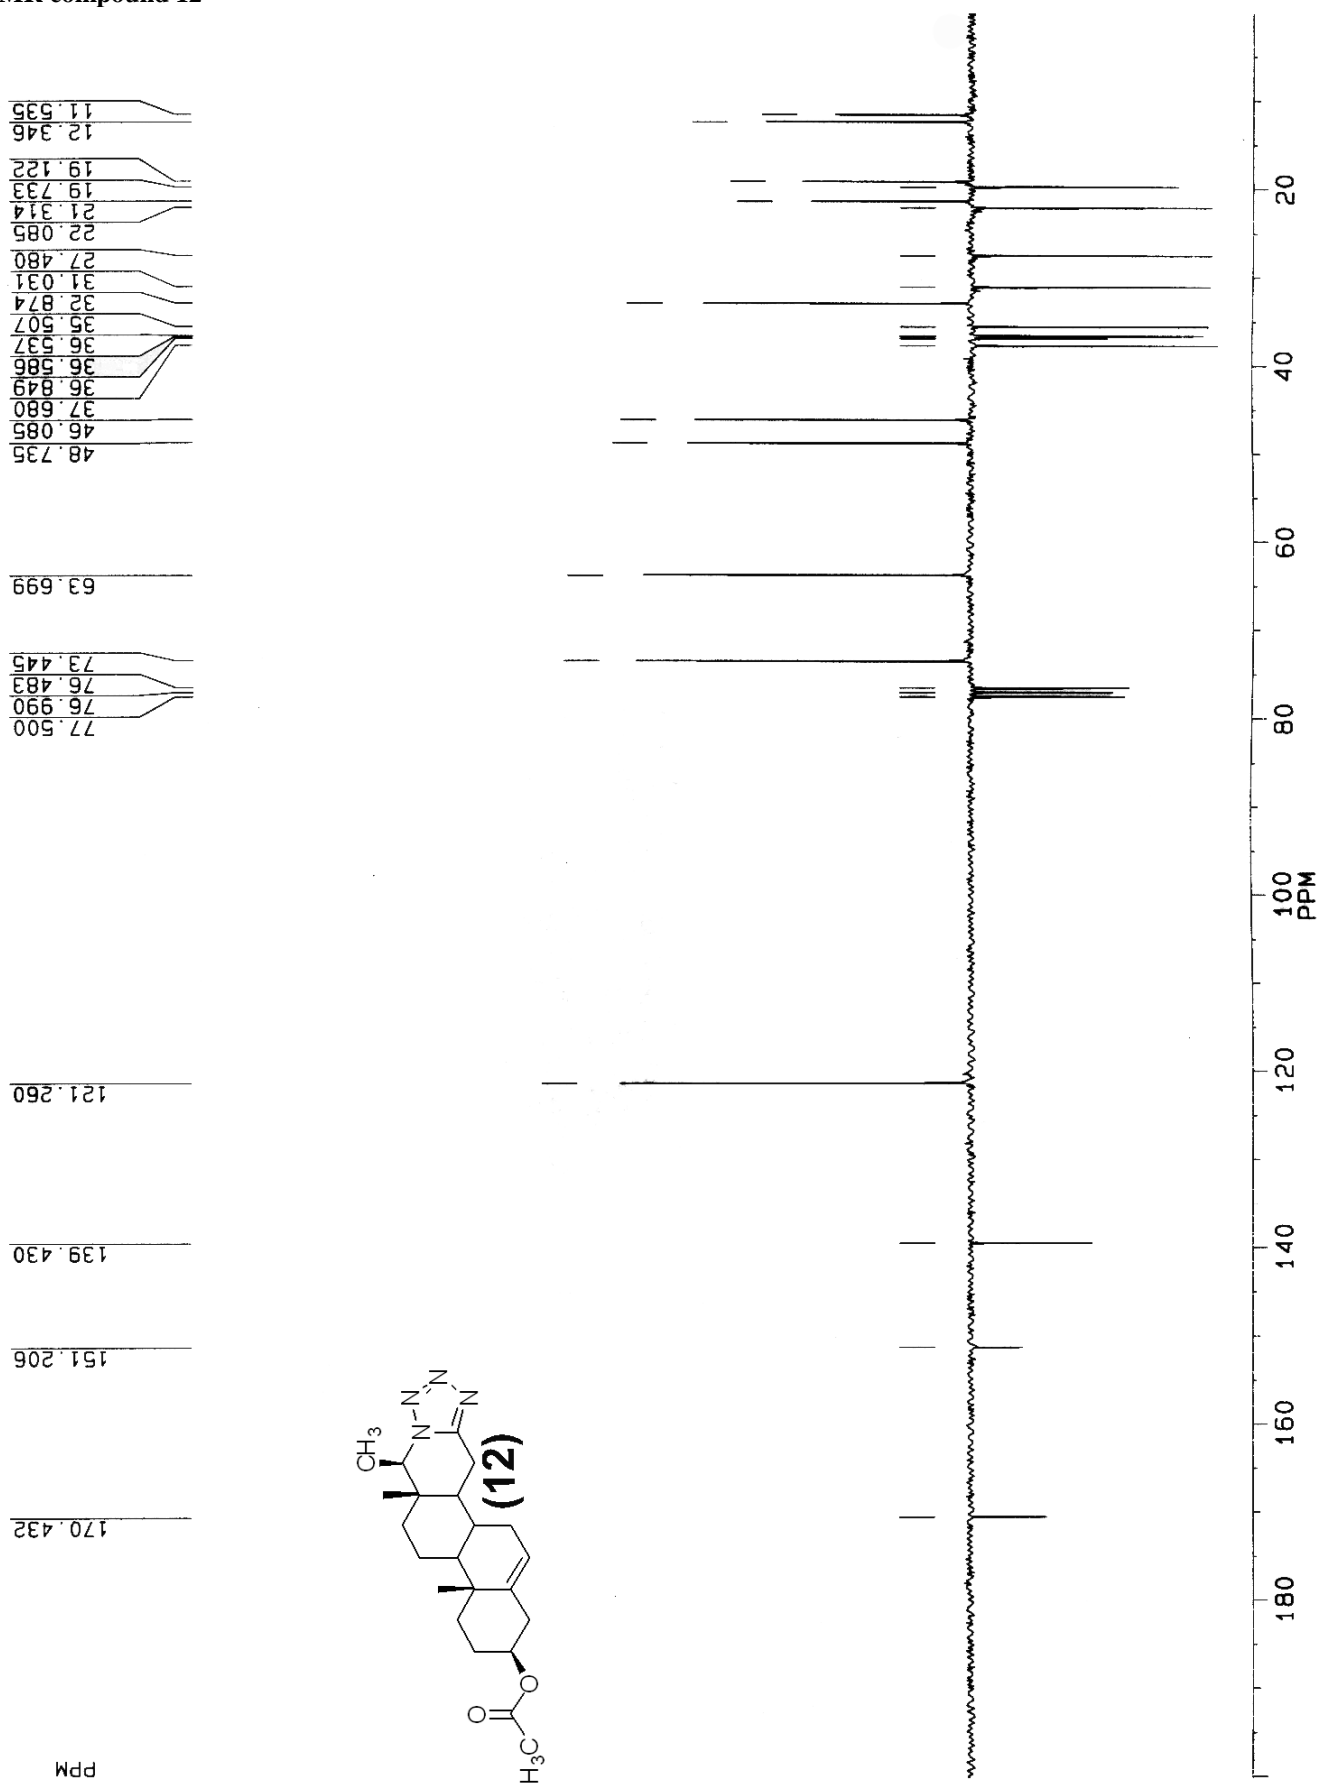

IR compound 12

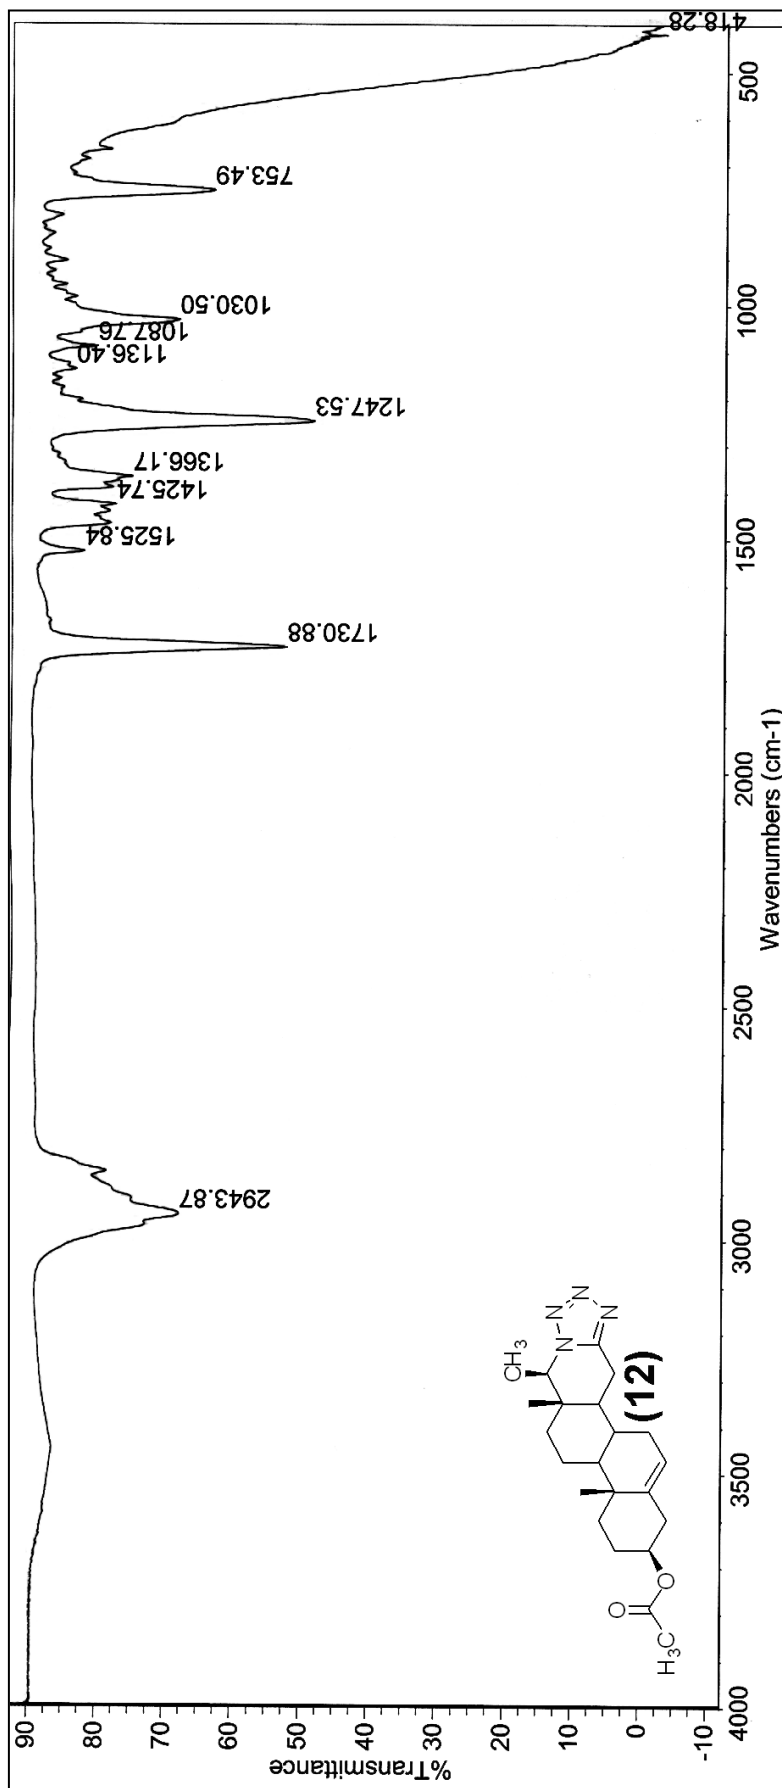



HRMS compound 12

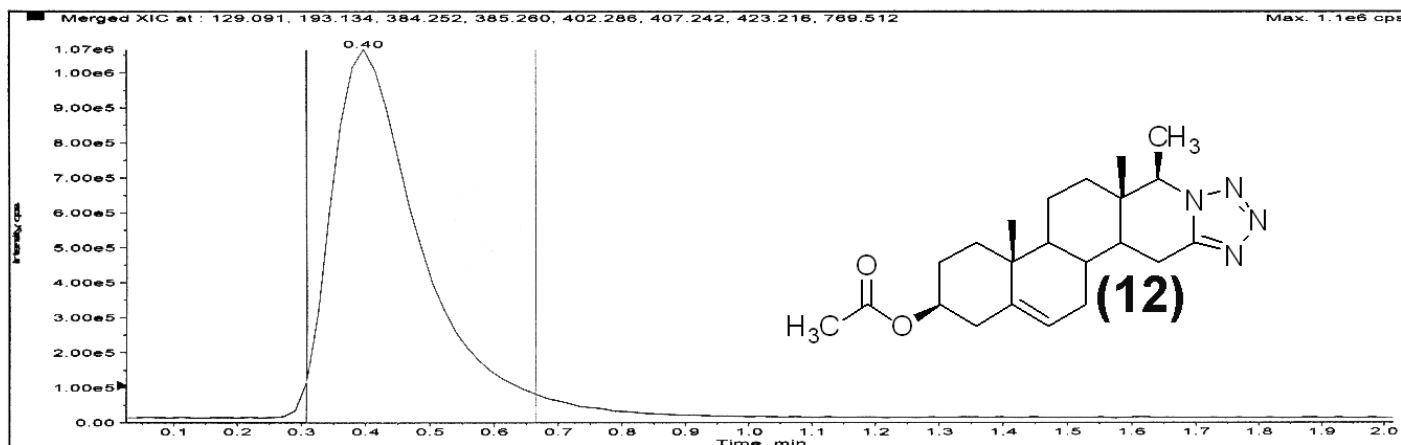

Merged XIC, Period# : 1 Experiment# : 1

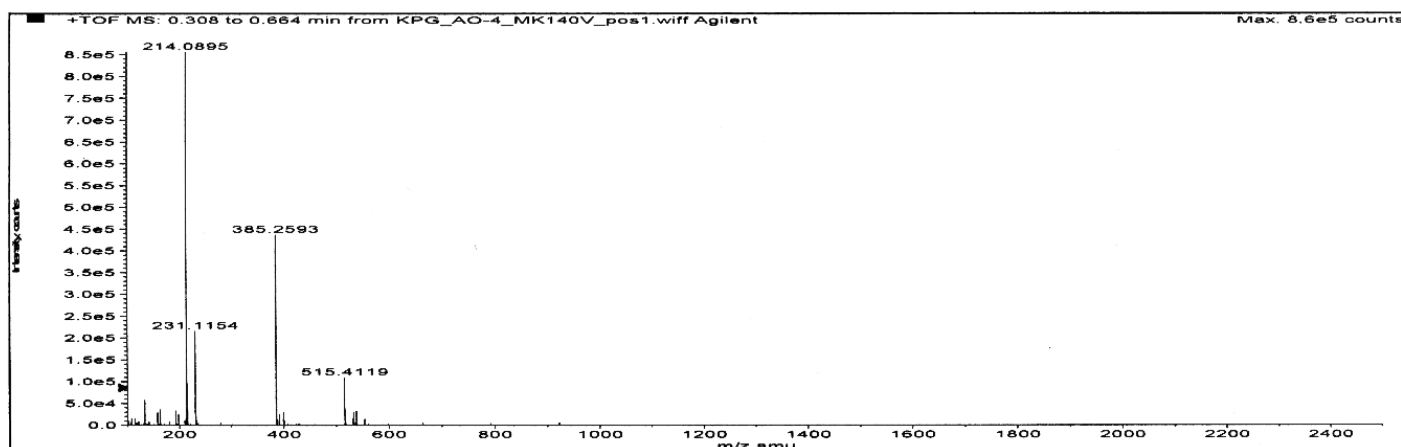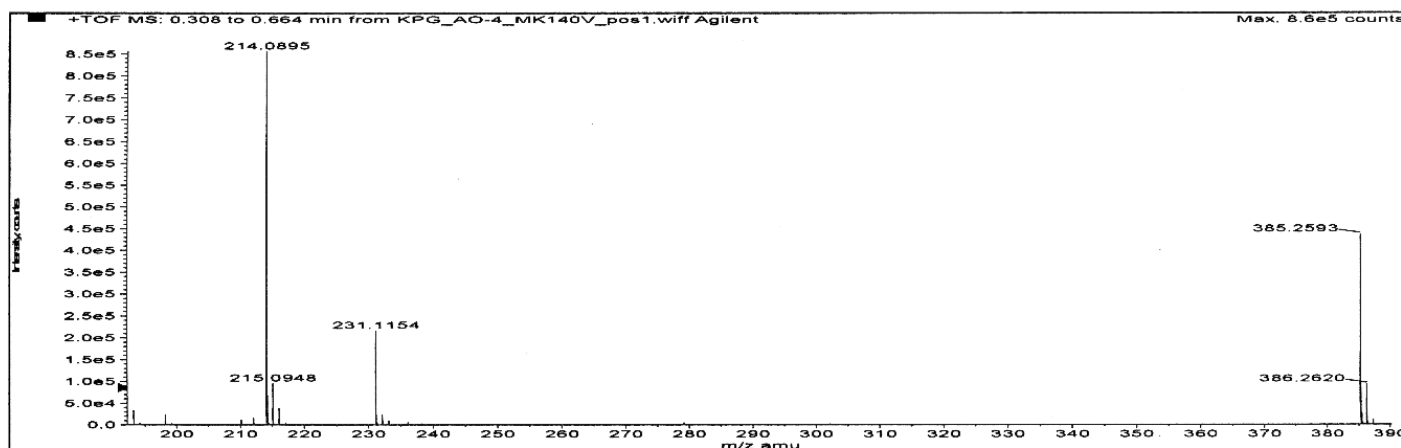

| Formula    | Compound name | Mass      | Peak RT (min) | Peak area  | Description |
|------------|---------------|-----------|---------------|------------|-------------|
| C22H32N4O2 | --            | 384.25253 | 0.40          | 1.02912 E7 | --          |

| Species              | Abundance (counts) | Ion Mass  | Measured Mass | Error (mDa) | Error (ppm) | Ret. Time Error (min) |
|----------------------|--------------------|-----------|---------------|-------------|-------------|-----------------------|
| [M+2H] <sup>2+</sup> | 35683.33           | 193.13354 | 193.14292     | 9.38031     | 48.57       | --                    |
| [M+H] <sup>+</sup>   | 437176.46          | 385.25980 | 385.25933     | -0.46956    | -1.22       | --                    |

<sup>1</sup>H NOE compound 12

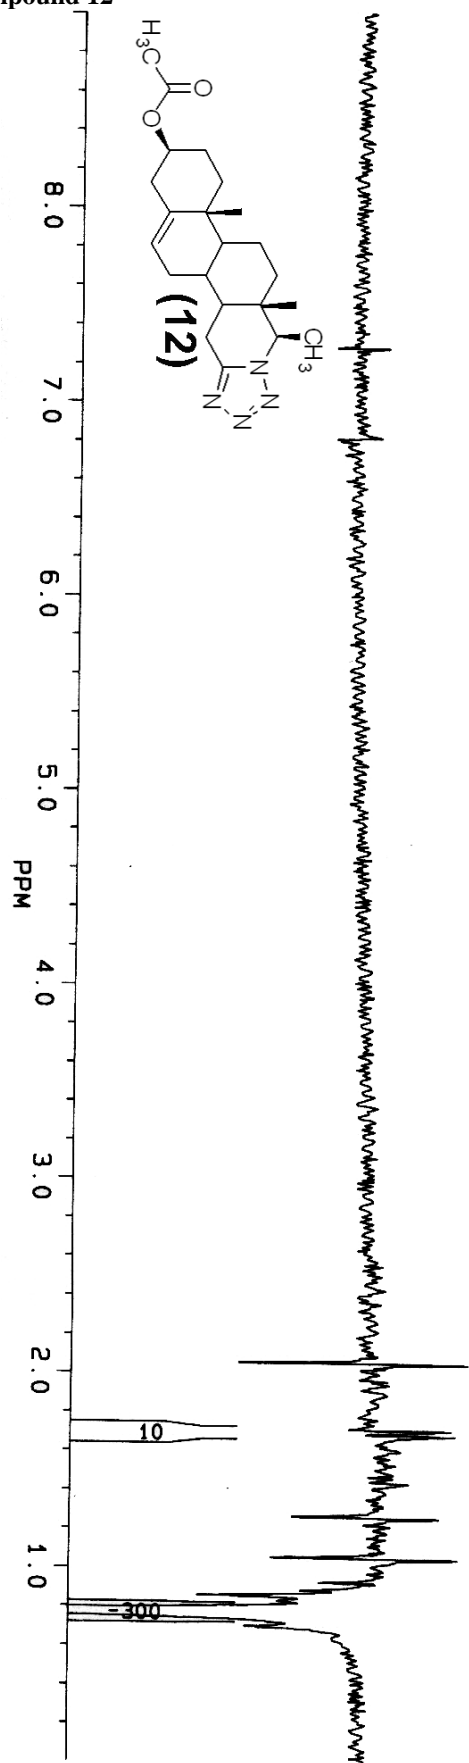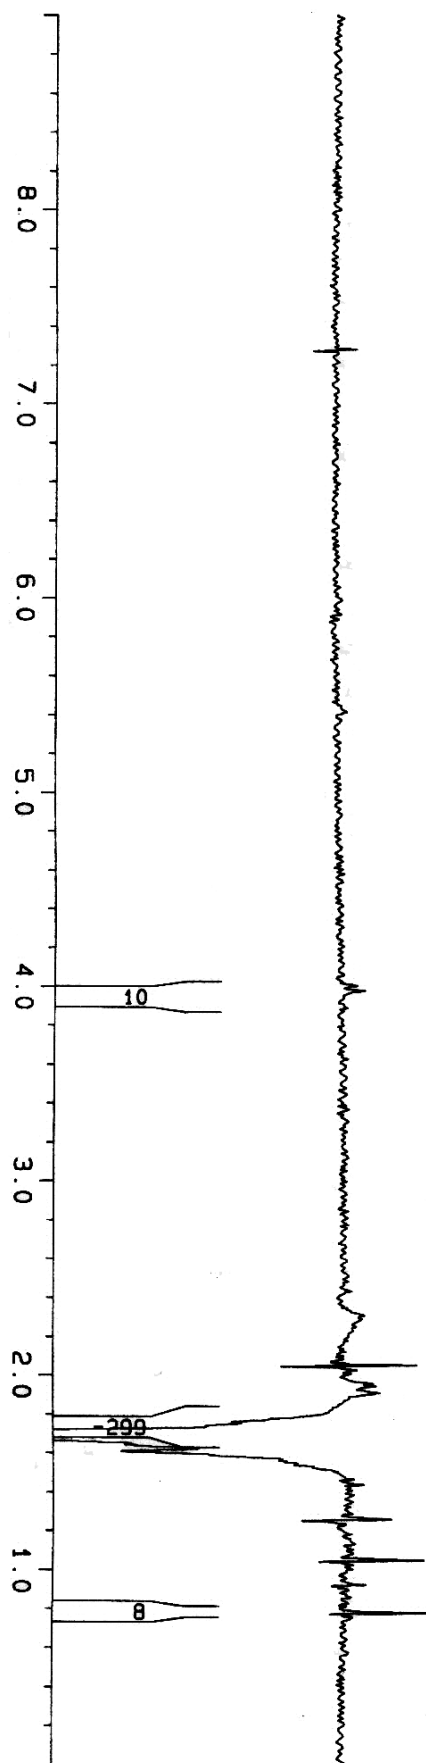

<sup>1</sup>H NMR compound 13

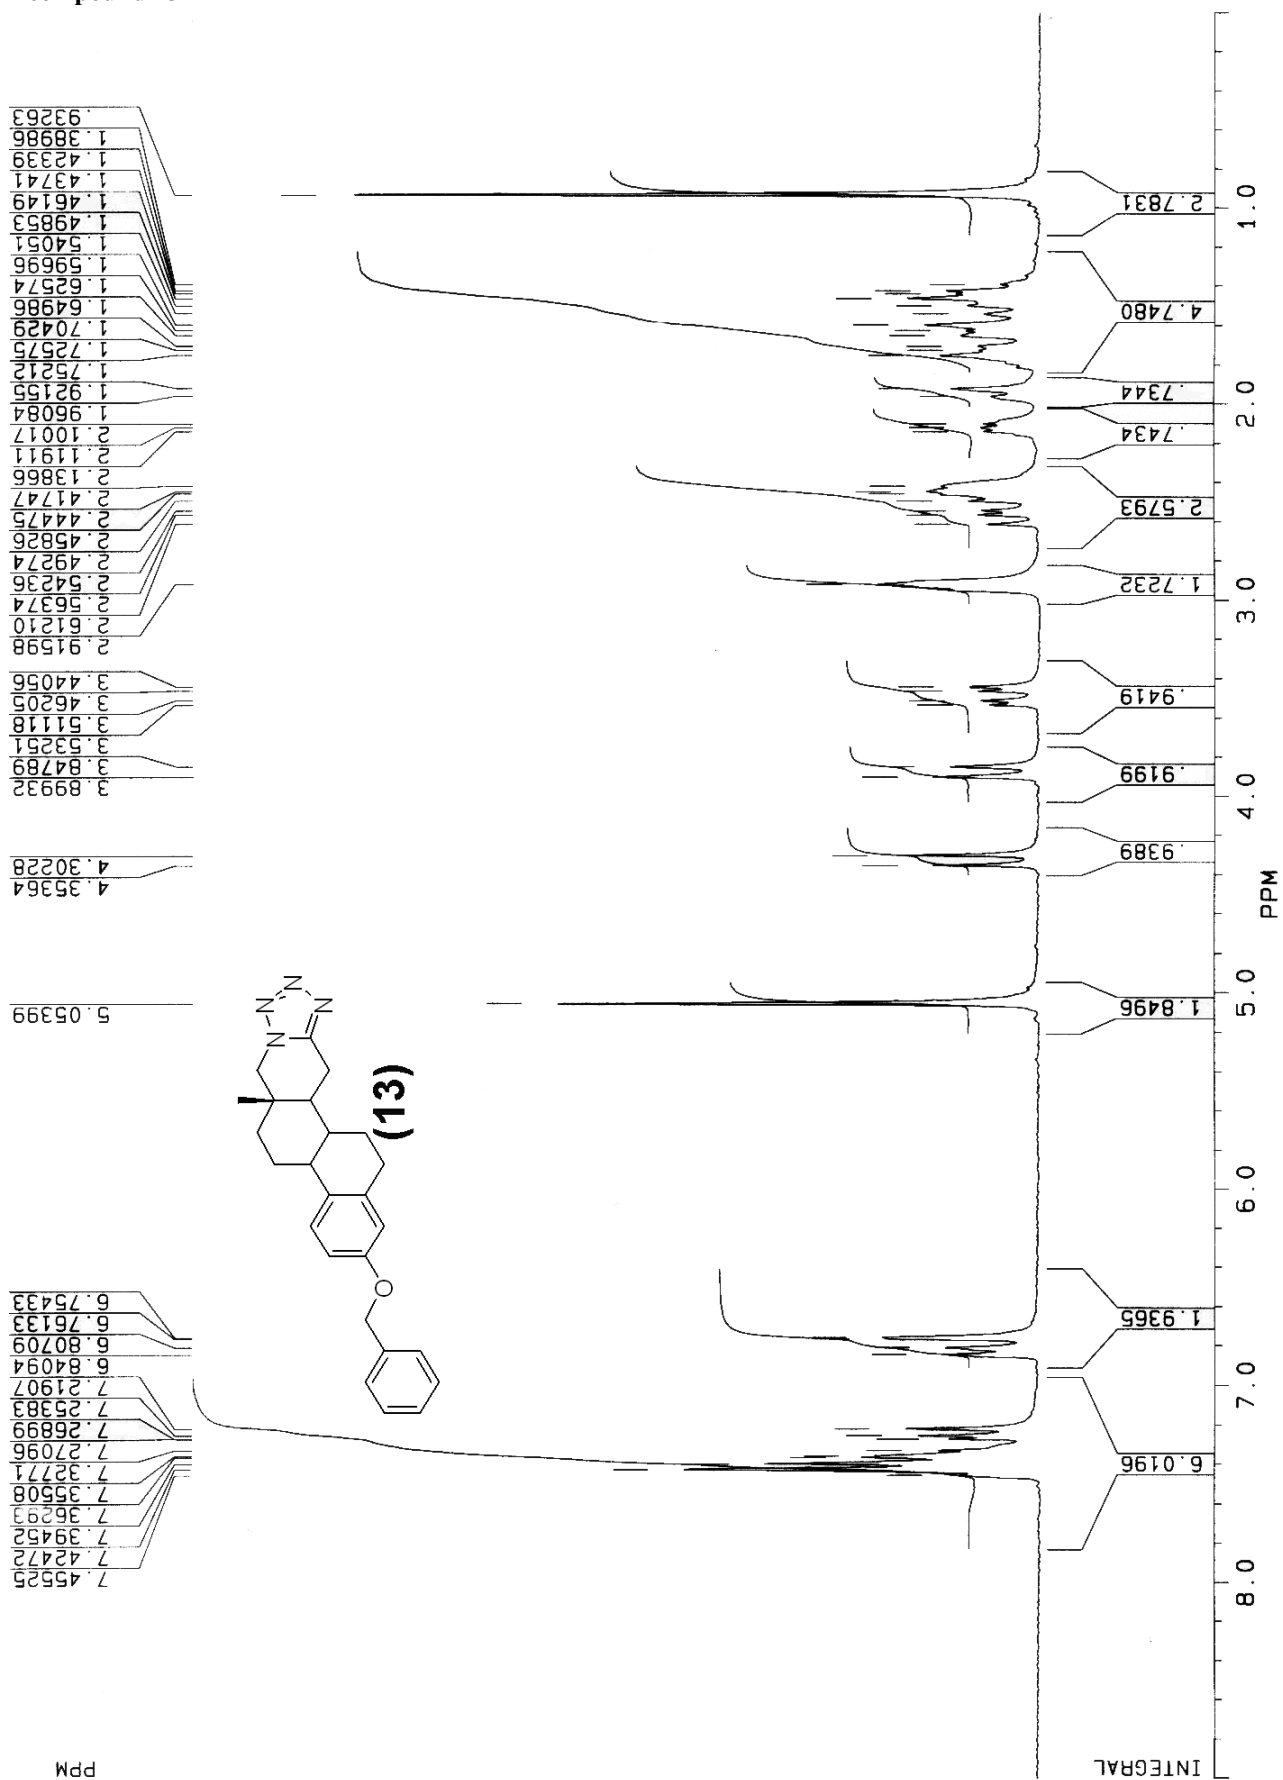

<sup>13</sup>C NMR compound 13

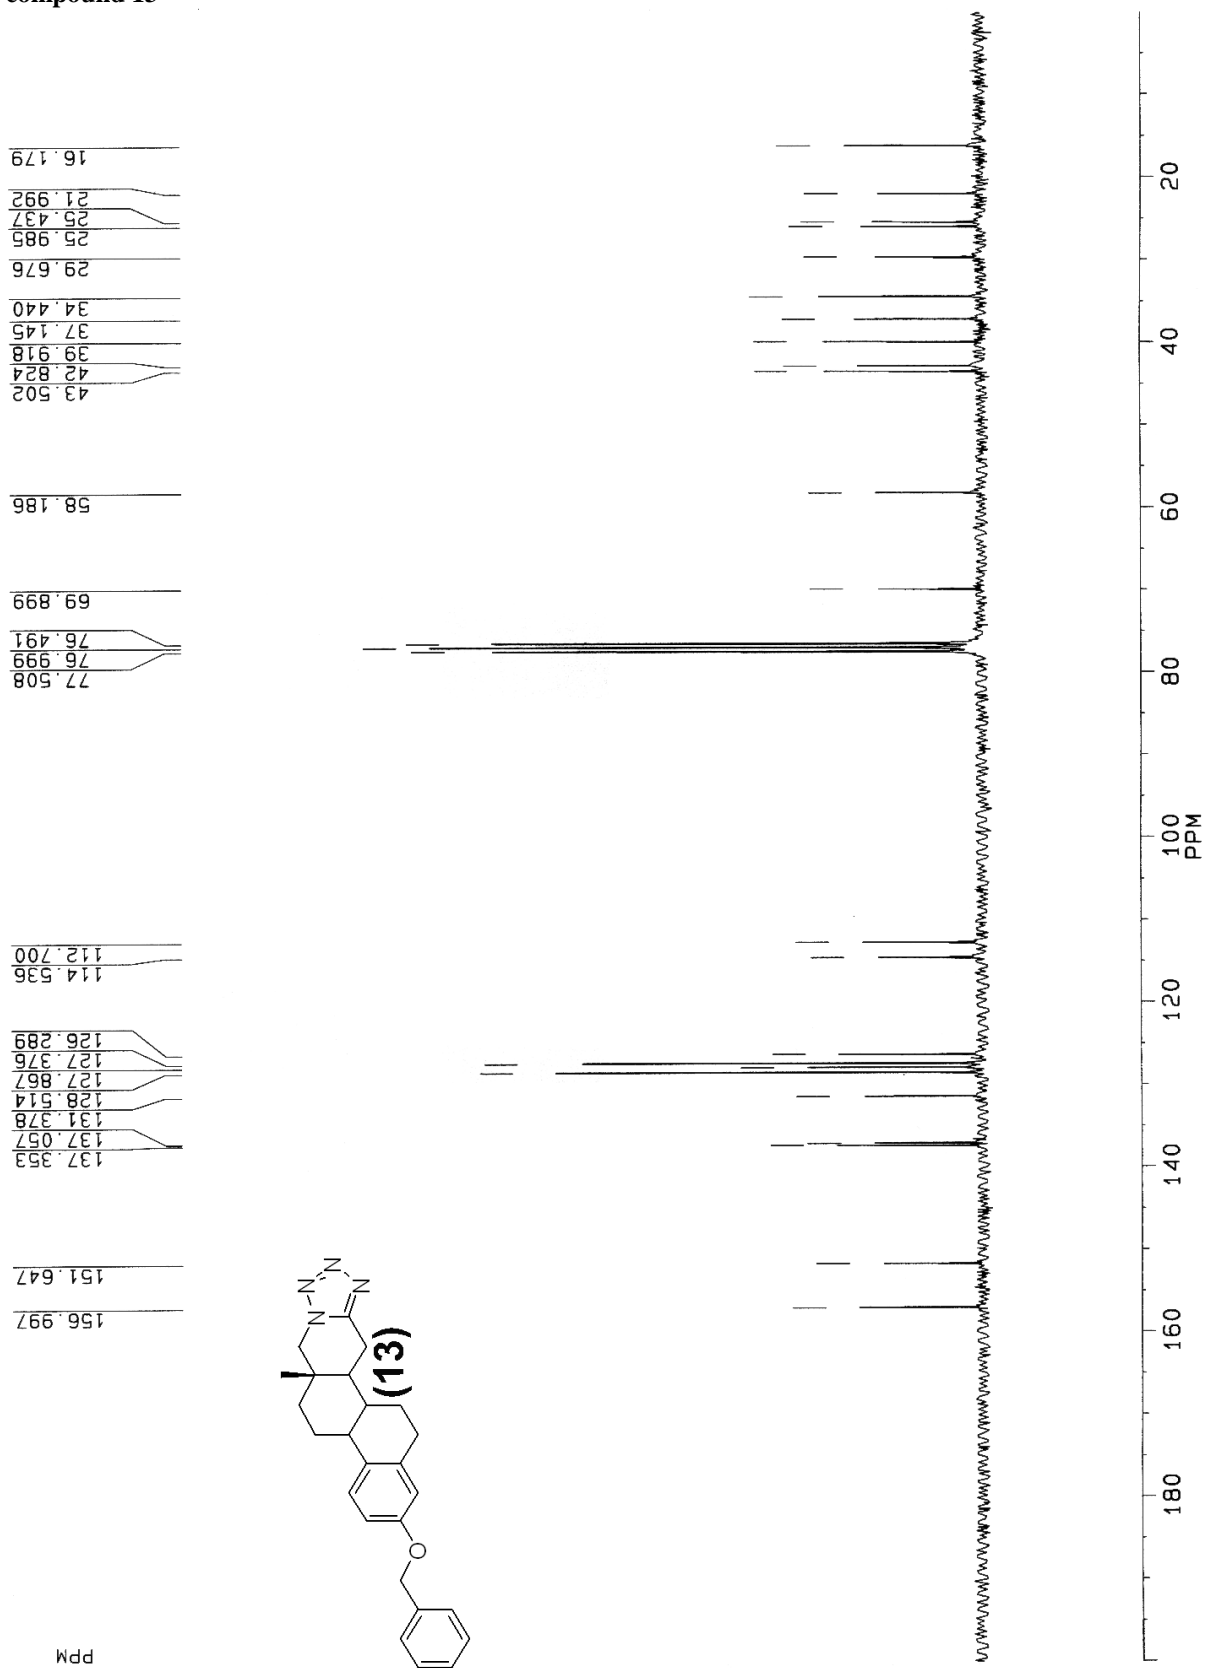

IR compound 13

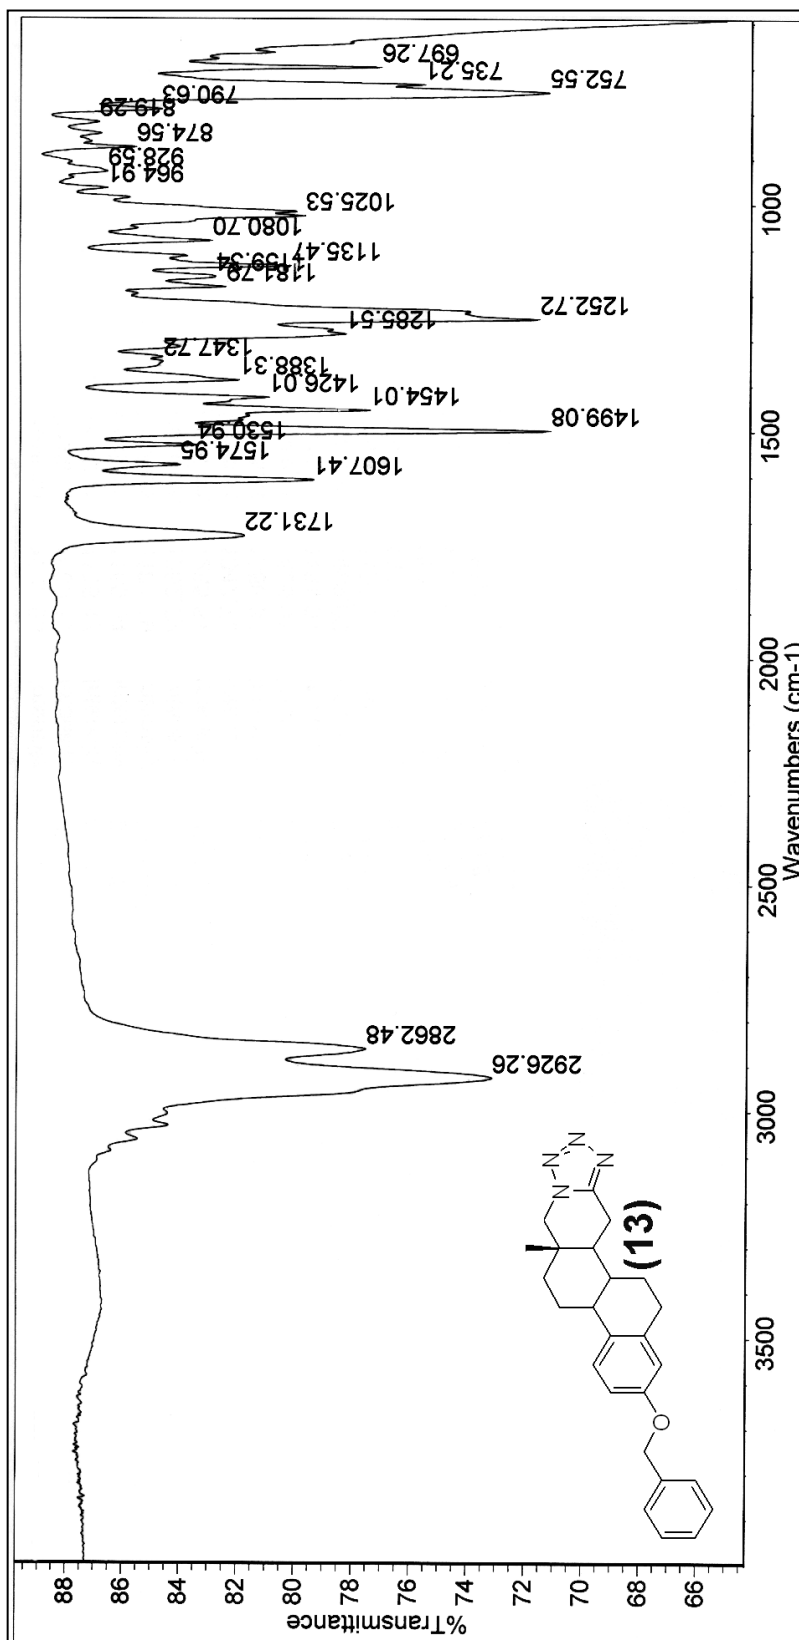

HRMS compound 13

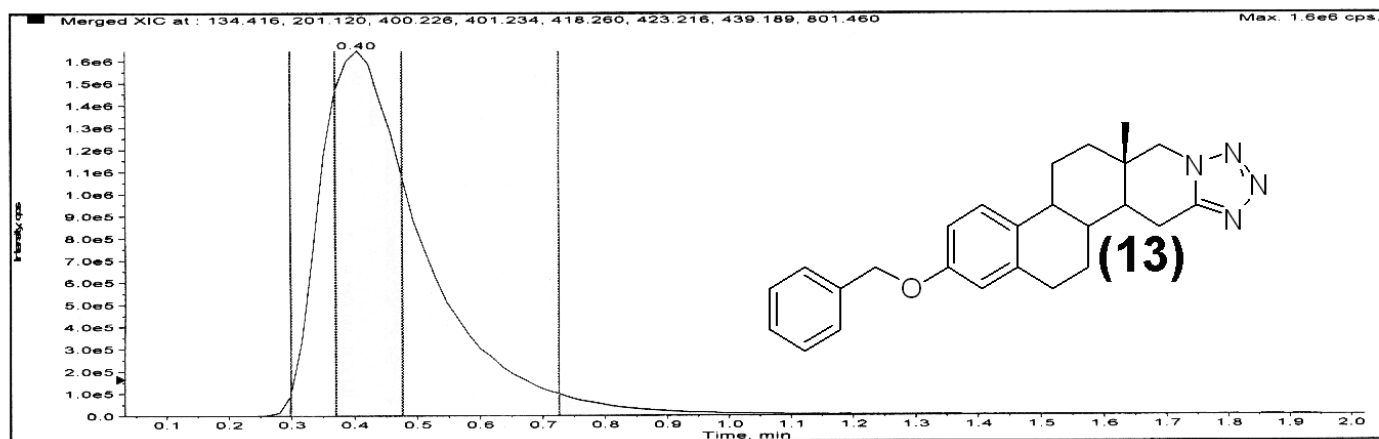

Merged XIC, Period# : 1 Experiment# : 1

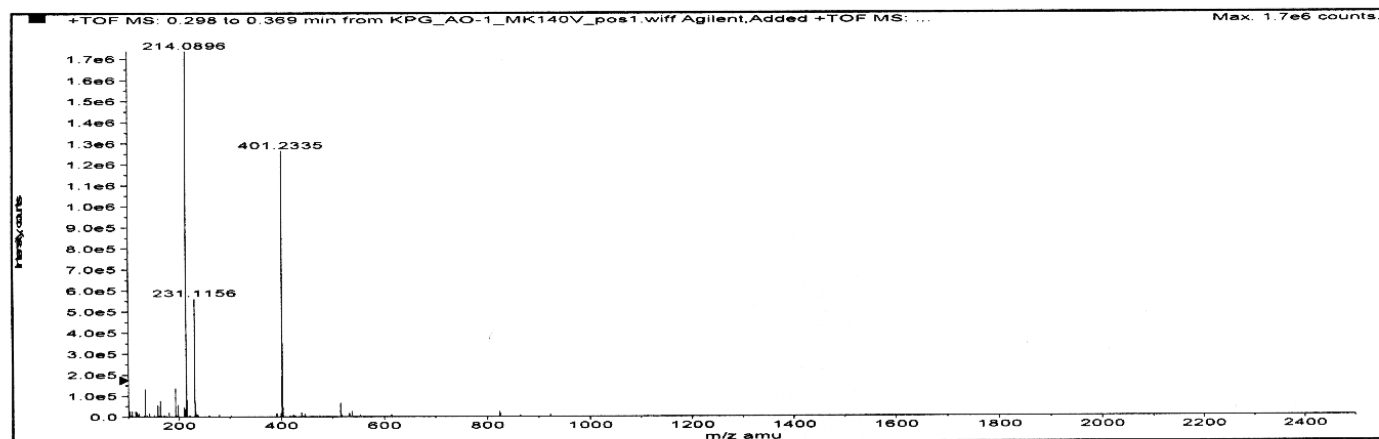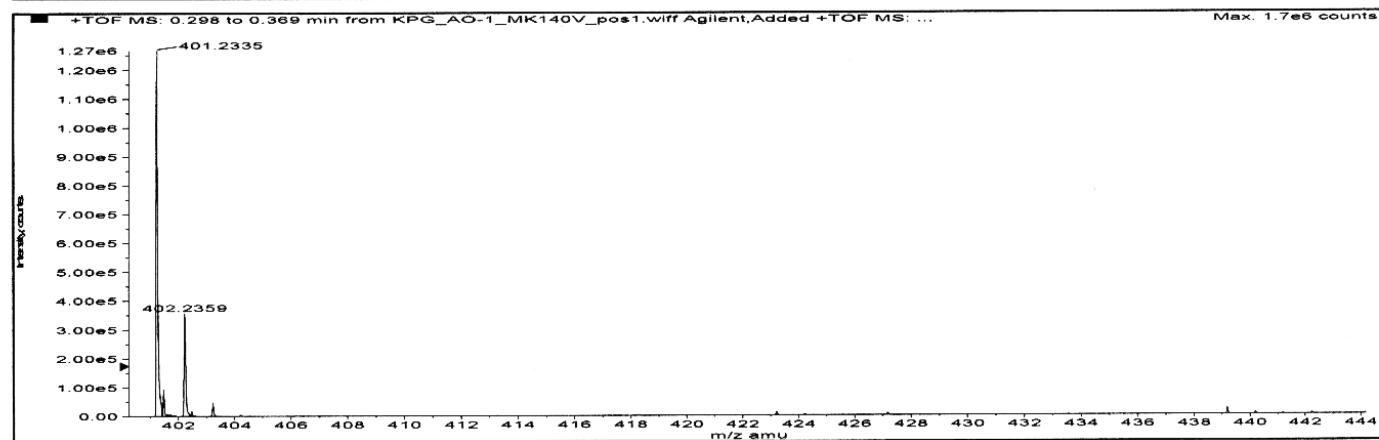

| Formula                                          | Compound name | Mass      | Peak RT (min) | Peak area  | Description |
|--------------------------------------------------|---------------|-----------|---------------|------------|-------------|
| C <sub>25</sub> H <sub>28</sub> N <sub>4</sub> O | --            | 400.22631 | 0.40          | 1.89047 E7 | --          |

| Species            | Abundance (counts) | Ion Mass  | Measured Mass | Error (mDa) | Error (ppm) | Ret. Time Error (min) |
|--------------------|--------------------|-----------|---------------|-------------|-------------|-----------------------|
| [M+H] <sup>+</sup> | 1294851.84         | 401.23359 | 401.23348     | -0.11068    | -0.28       | --                    |
| [M+K] <sup>+</sup> | 22057.92           | 439.18947 | 439.18872     | -0.74703    | -1.70       | --                    |

$^1\text{H}$  NMR compound 14

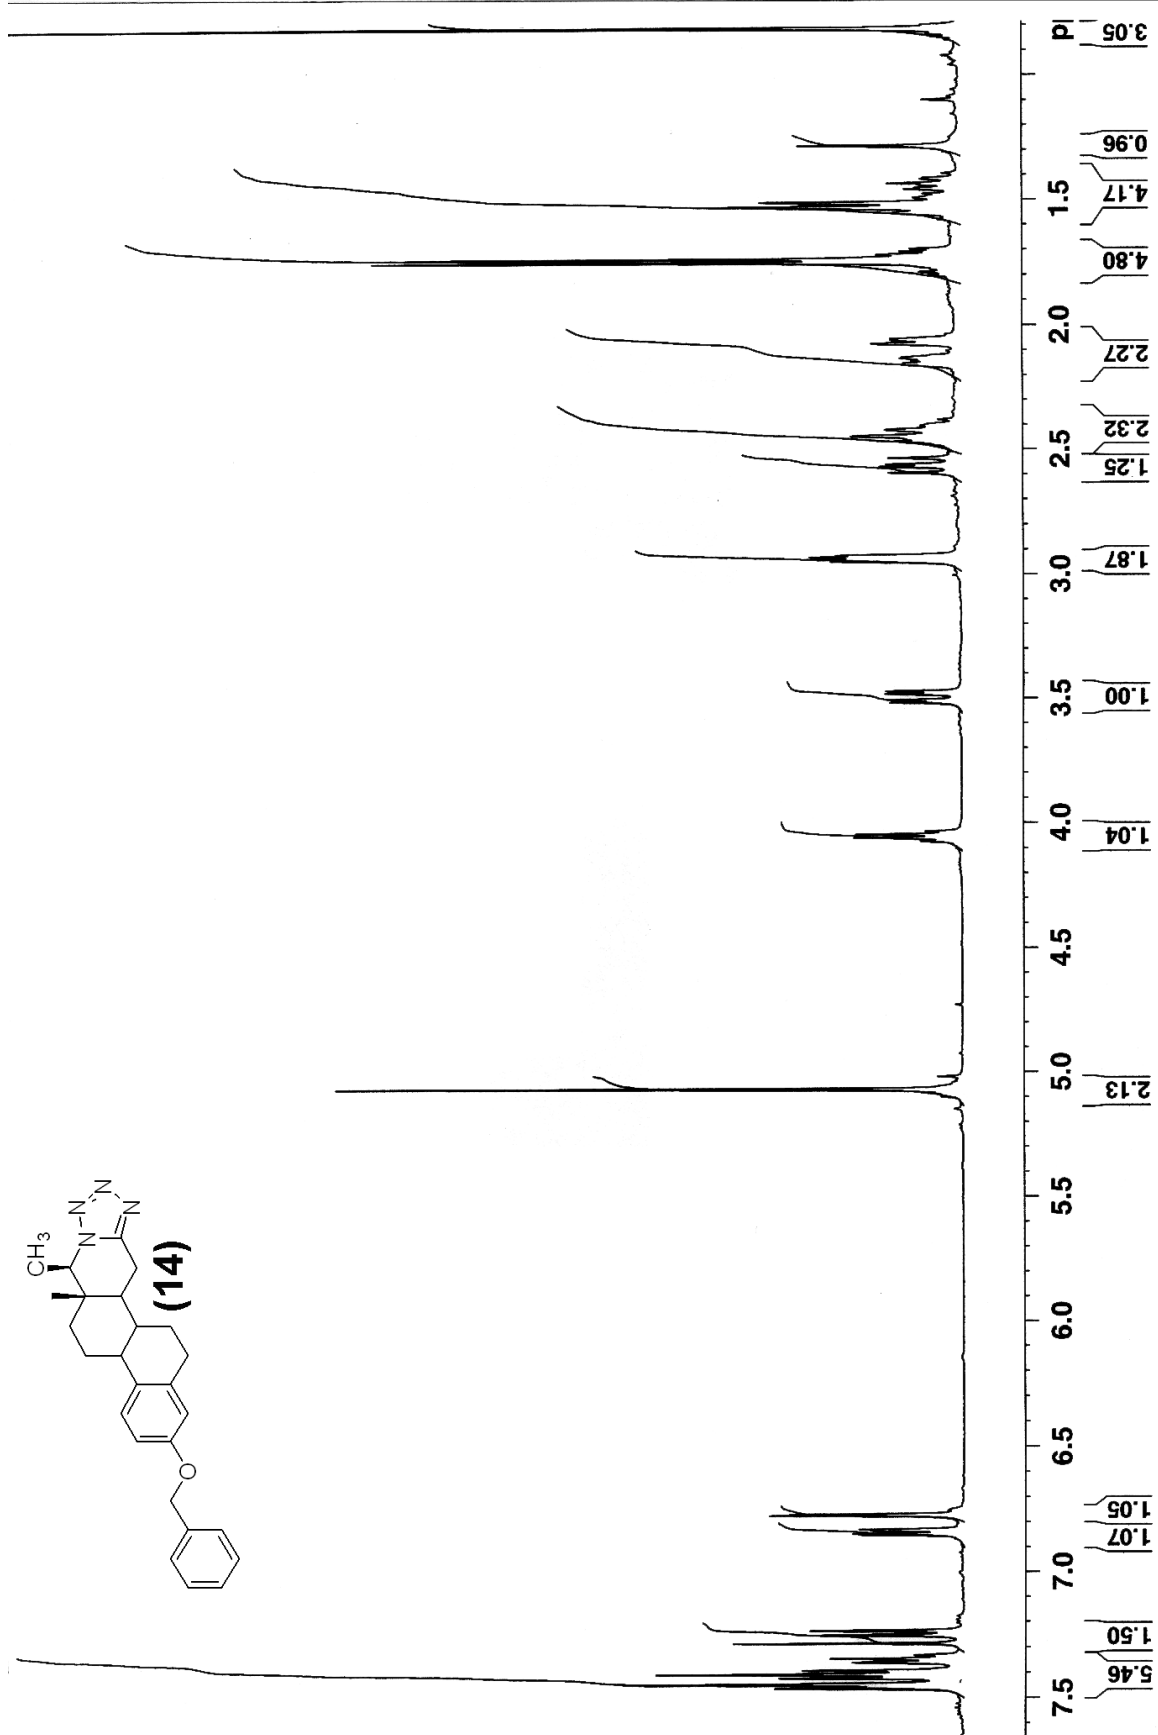

<sup>13</sup>C NMR compound 14

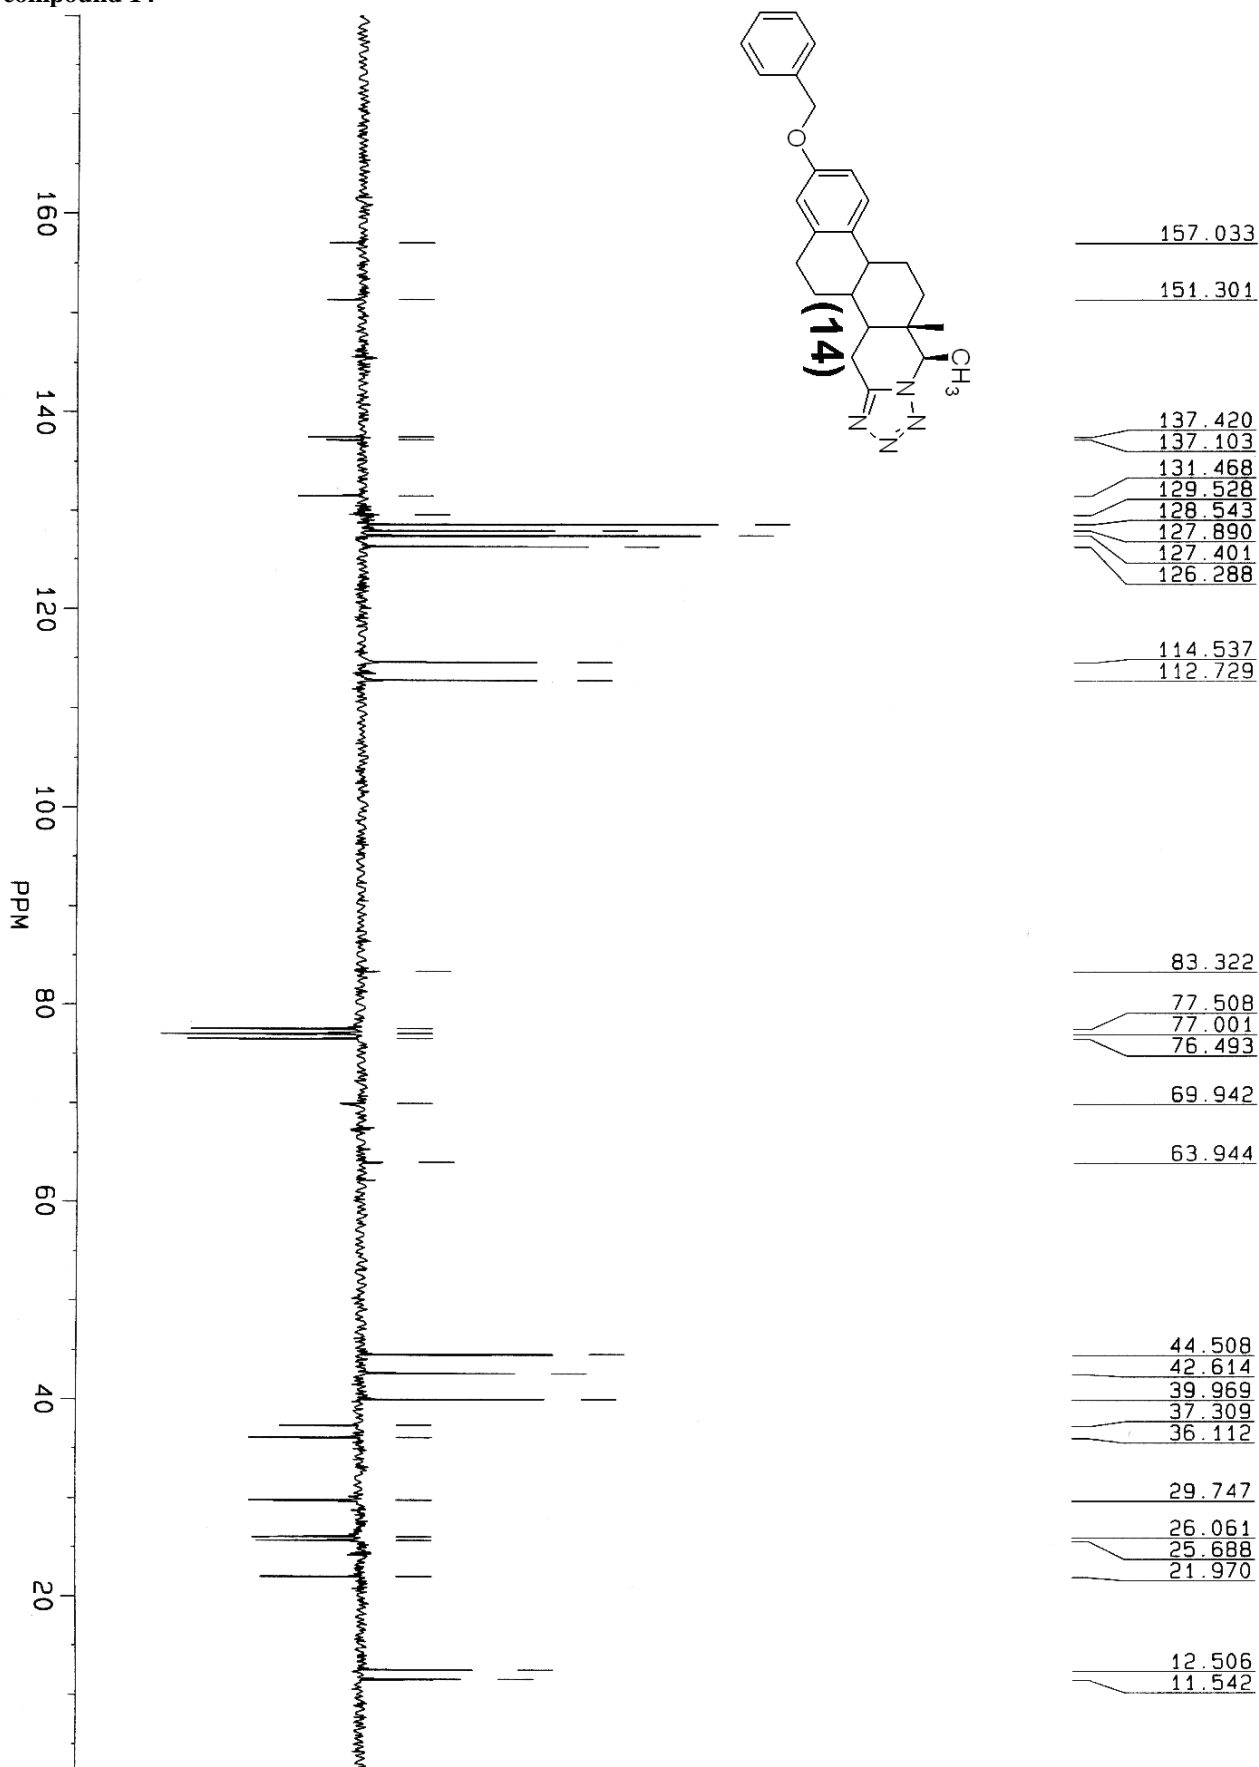



IR compound 14

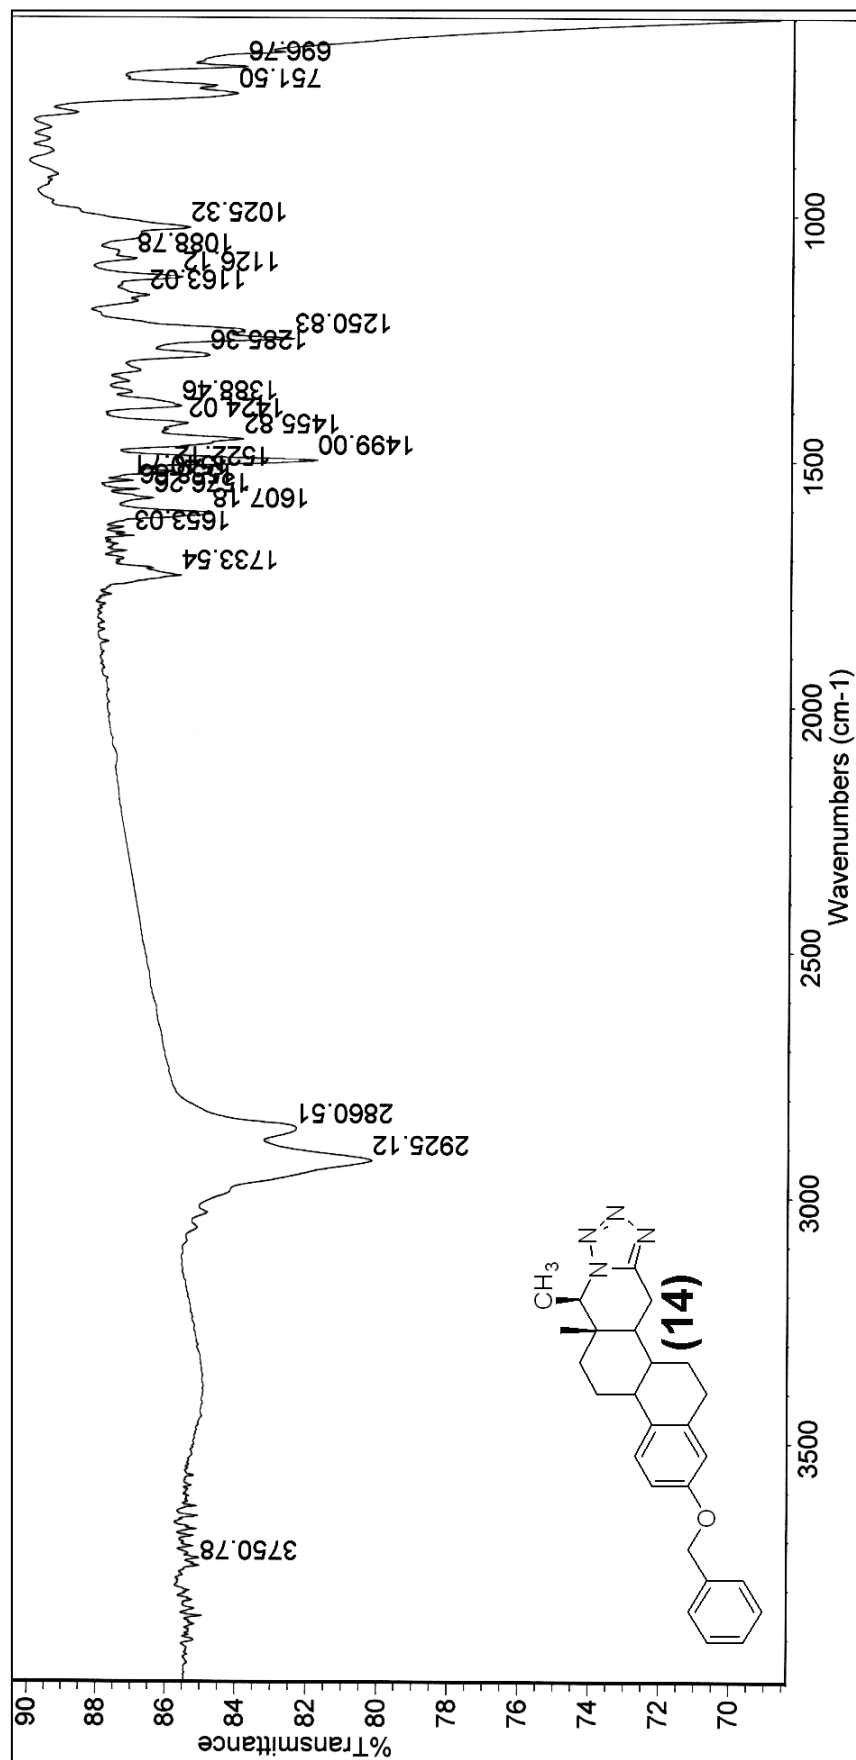

HRMS compound 14

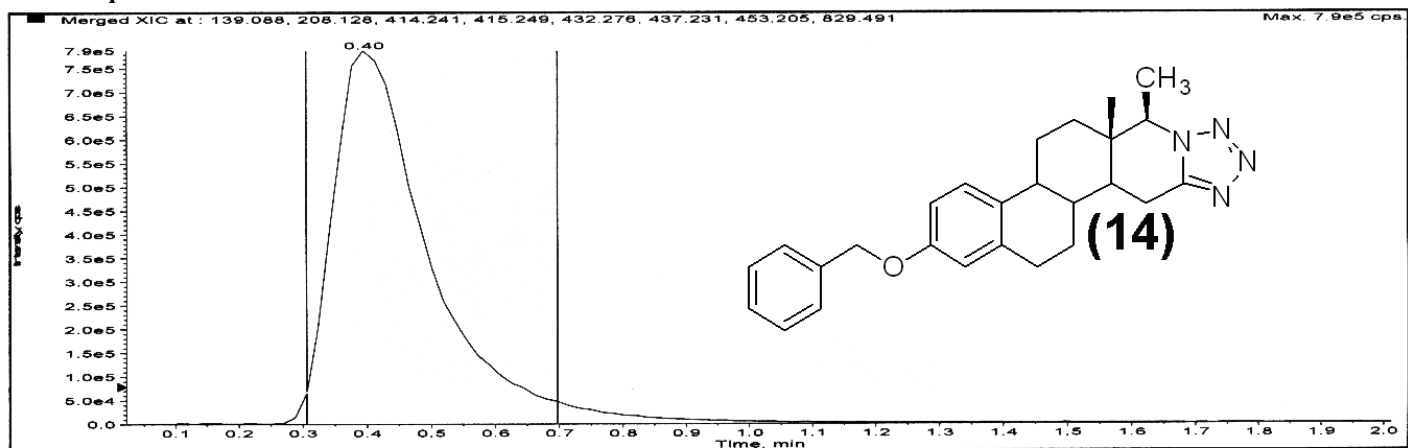

Merged XIC, Period# : 1 Experiment# : 1

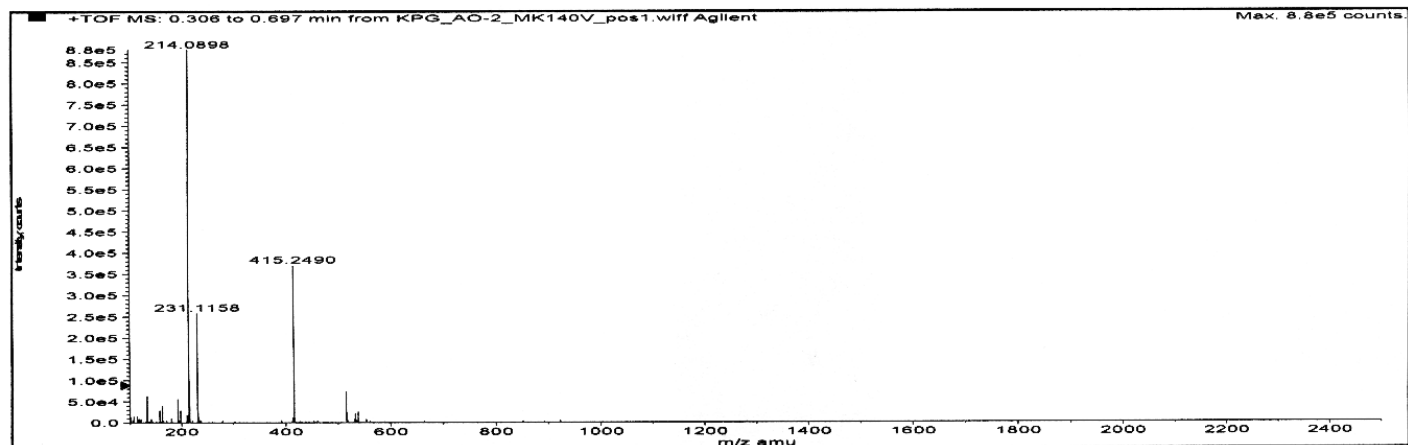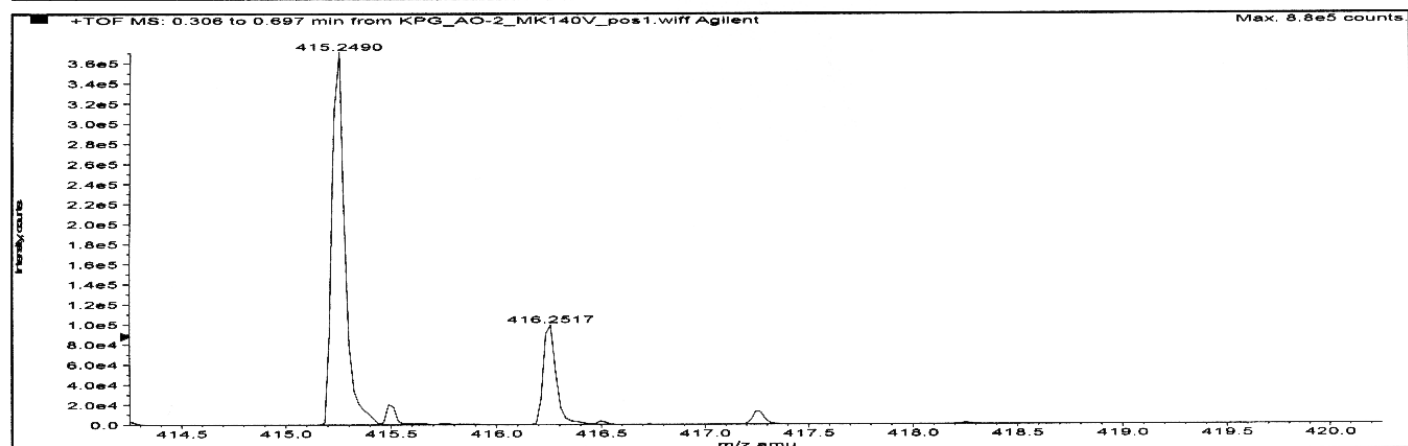

| Formula                                          | Compound name | Mass      | Peak RT (min) | Peak area  | Description |
|--------------------------------------------------|---------------|-----------|---------------|------------|-------------|
| C <sub>26</sub> H <sub>30</sub> N <sub>4</sub> O | --            | 414.24196 | 0.40          | 8.10611 E6 | --          |

| Species            | Abundance (counts) | Ion Mass  | Measured Mass | Error (mDa) | Error (ppm) | Ret. Time Error (min) |
|--------------------|--------------------|-----------|---------------|-------------|-------------|-----------------------|
| [M+H] <sup>+</sup> | 376726.79          | 415.24924 | 415.24895     | -0.28721    | -0.69       | --                    |

<sup>1</sup>H NOE compound 14

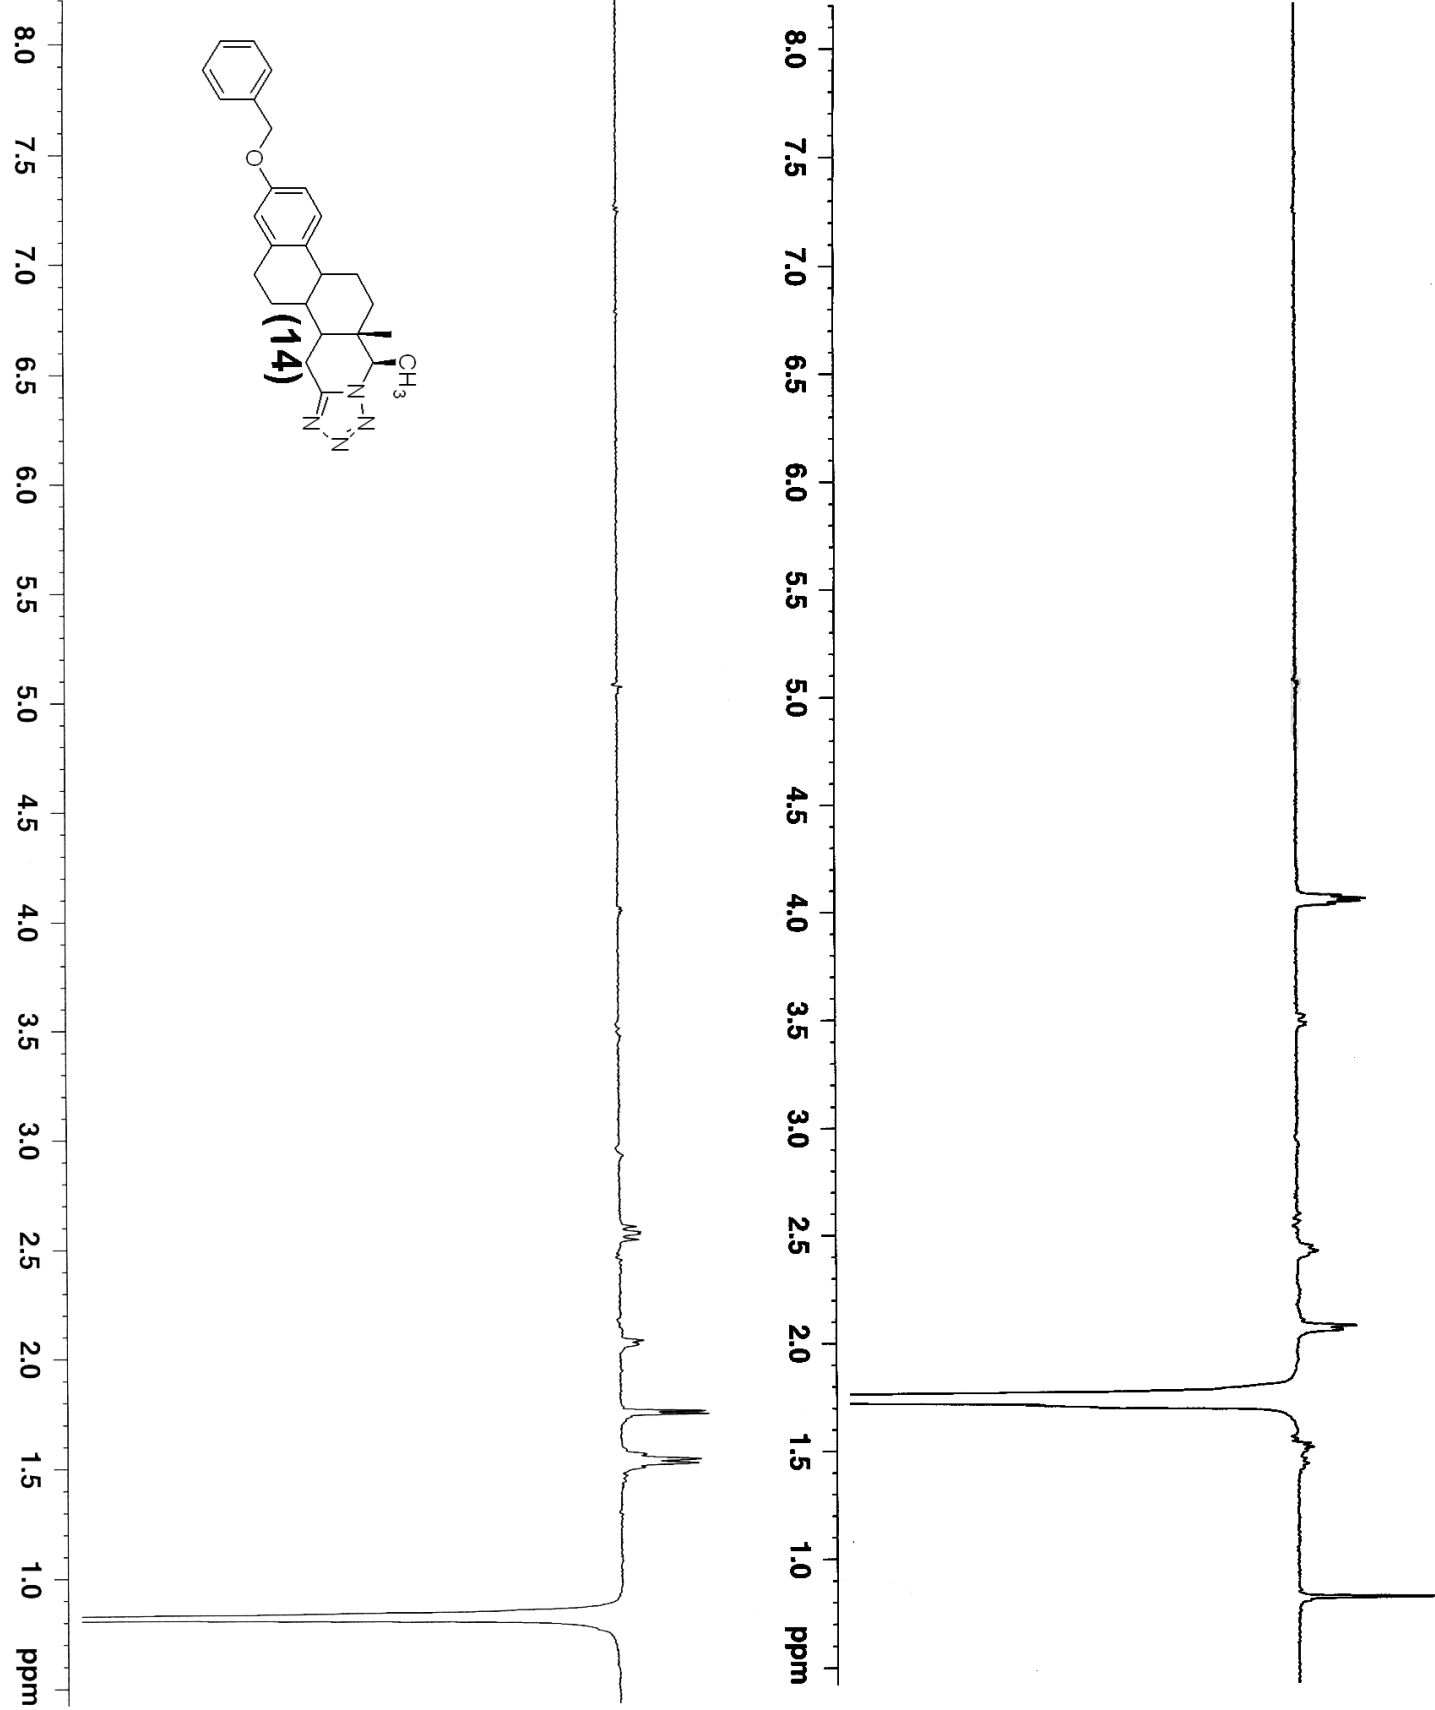

### X-ray crystal structure of compound 10

**Table 1.** Crystal data and structure refinement for **10**.

|                                   |                                             |         |
|-----------------------------------|---------------------------------------------|---------|
| Identification code               | Compound 10                                 |         |
| Empirical formula                 | C <sub>26</sub> H <sub>29</sub> N O         |         |
| Formula weight                    | 371.50                                      |         |
| Temperature                       | 293(2) K                                    |         |
| Wavelength                        | 0.71069 Å                                   |         |
| Crystal system                    | Orthorhombic                                |         |
| Space group                       | P 21 21 21                                  |         |
| Unit cell dimensions              | a = 10.984(5) Å                             | α = 90° |
|                                   | b = 11.098(5) Å                             | β = 90° |
|                                   | c = 17.391(5) Å                             | γ = 90° |
| Volume                            | 2120.0(15) Å <sup>3</sup>                   |         |
| Z                                 | 4                                           |         |
| Density (calculated)              | 1.164 Mg/m <sup>3</sup>                     |         |
| Absorption coefficient            | 0.070 mm <sup>-1</sup>                      |         |
| F(000)                            | 800                                         |         |
| Crystal size                      | 0.293 x 0.158 x 0.098 mm <sup>3</sup>       |         |
| Theta range for data collection   | 3.51 to 25.00°                              |         |
| Index ranges                      | -13 ≤ h ≤ 10, -13 ≤ k ≤ 12, -20 ≤ l ≤ 15    |         |
| Reflections collected             | 5383                                        |         |
| Independent reflections           | 3476 [R(int) = 0.0213]                      |         |
| Completeness to theta = 25.00°    | 99.7 %                                      |         |
| Absorption correction             | Semi-empirical from equivalents             |         |
| Max. and min. transmission        | 1.00000 and 0.99475                         |         |
| Refinement method                 | Full-matrix least-squares on F <sup>2</sup> |         |
| Data / restraints / parameters    | 3476 / 0 / 275                              |         |
| Goodness-of-fit on F <sup>2</sup> | 0.804                                       |         |
| Final R indices [I > 2σ(I)]       | R1 = 0.0361, wR2 = 0.0609                   |         |
| R indices (all data)              | R1 = 0.0987, wR2 = 0.0706                   |         |
| Absolute structure parameter      | 0.7(18)                                     |         |
| Extinction coefficient            | 0.0011(4)                                   |         |
| Largest diff. peak and hole       | 0.086 and -0.070 e.Å <sup>-3</sup>          |         |

**Table 2.** Atomic coordinates ( $\times 10^4$ ) and equivalent isotropic displacement parameters ( $\text{\AA}^2 \times 10^3$ ) for **10**.  $U(\text{eq})$  is defined as one third of the trace of the orthogonalized  $U^{ij}$  tensor.

|       | x       | y        | z        | $U(\text{eq})$ |
|-------|---------|----------|----------|----------------|
| O(1)  | 4664(2) | 8427(1)  | 6550(1)  | 78(1)          |
| C(8)  | 3902(2) | 9189(2)  | 10220(1) | 58(1)          |
| C(10) | 3605(2) | 8430(2)  | 8853(1)  | 57(1)          |
| C(4)  | 4763(2) | 9337(2)  | 7827(1)  | 63(1)          |
| C(9)  | 3142(3) | 8393(2)  | 9674(1)  | 64(1)          |
| C(1)  | 3205(2) | 7579(2)  | 8324(2)  | 70(1)          |
| C(5)  | 4384(2) | 9323(2)  | 8595(1)  | 56(1)          |
| C(6)  | 4854(2) | 10290(2) | 9128(1)  | 68(1)          |
| C(2)  | 3580(2) | 7596(2)  | 7570(2)  | 71(1)          |
| C(3)  | 4358(2) | 8480(2)  | 7318(1)  | 61(1)          |
| C(14) | 3313(3) | 9234(2)  | 11018(1) | 66(1)          |
| C(7)  | 4095(2) | 10418(2) | 9854(1)  | 67(1)          |
| C(21) | 5689(3) | 9029(2)  | 5425(1)  | 66(1)          |
| C(20) | 5504(2) | 9298(2)  | 6259(1)  | 73(1)          |
| C(26) | 6785(3) | 8665(2)  | 5143(2)  | 76(1)          |
| C(13) | 3121(3) | 7982(2)  | 11389(1) | 72(1)          |
| C(11) | 3002(3) | 7146(2)  | 10011(1) | 85(1)          |
| C(15) | 3924(3) | 10139(2) | 11571(1) | 77(1)          |
| C(17) | 2299(4) | 8129(3)  | 12087(2) | 95(1)          |
| C(16) | 5238(3) | 10048(2) | 11608(2) | 76(1)          |
| C(25) | 6952(3) | 8433(2)  | 4371(2)  | 89(1)          |
| C(24) | 6008(4) | 8603(3)  | 3875(2)  | 96(1)          |
| N(1)  | 6260(3) | 9988(2)  | 11640(2) | 114(1)         |
| C(12) | 2432(3) | 7188(2)  | 10804(1) | 93(1)          |
| C(18) | 2490(4) | 7837(3)  | 12784(3) | 110(1)         |
| C(19) | 4320(3) | 7373(2)  | 11604(1) | 92(1)          |
| C(22) | 4759(3) | 9164(3)  | 4920(2)  | 106(1)         |
| C(23) | 4912(4) | 8958(3)  | 4143(2)  | 117(1)         |

**Table 3.** Bond lengths [Å] and angles [°] for **10**.

---

|              |           |
|--------------|-----------|
| O(1)-C(3)    | 1.379(2)  |
| O(1)-C(20)   | 1.429(3)  |
| C(8)-C(7)    | 1.519(3)  |
| C(8)-C(14)   | 1.532(3)  |
| C(8)-C(9)    | 1.542(3)  |
| C(8)-H(8)    | 0.9800    |
| C(10)-C(5)   | 1.384(3)  |
| C(10)-C(1)   | 1.390(3)  |
| C(10)-C(9)   | 1.517(3)  |
| C(4)-C(3)    | 1.373(3)  |
| C(4)-C(5)    | 1.398(3)  |
| C(4)-H(4)    | 0.9300    |
| C(9)-C(11)   | 1.510(3)  |
| C(9)-H(99)   | 0.941(19) |
| C(1)-C(2)    | 1.375(3)  |
| C(1)-H(1)    | 0.9300    |
| C(5)-C(6)    | 1.509(3)  |
| C(6)-C(7)    | 1.519(3)  |
| C(6)-H(6A)   | 0.9700    |
| C(6)-H(6B)   | 0.9700    |
| C(2)-C(3)    | 1.373(3)  |
| C(2)-H(2)    | 0.9300    |
| C(14)-C(15)  | 1.544(3)  |
| C(14)-C(13)  | 1.546(3)  |
| C(14)-H(14)  | 0.946(17) |
| C(7)-H(7A)   | 0.9700    |
| C(7)-H(7B)   | 0.9700    |
| C(21)-C(22)  | 1.356(3)  |
| C(21)-C(26)  | 1.361(3)  |
| C(21)-C(20)  | 1.494(3)  |
| C(20)-H(20A) | 0.9700    |
| C(20)-H(20B) | 0.9700    |
| C(26)-C(25)  | 1.380(3)  |
| C(26)-H(26)  | 0.9300    |
| C(13)-C(17)  | 1.522(4)  |
| C(13)-C(19)  | 1.528(3)  |
| C(13)-C(12)  | 1.544(3)  |
| C(11)-C(12)  | 1.516(3)  |
| C(11)-H(11A) | 0.9700    |
| C(11)-H(11B) | 0.9700    |
| C(15)-C(16)  | 1.448(4)  |
| C(15)-H(15A) | 0.9700    |
| C(15)-H(15B) | 0.9700    |
| C(17)-C(18)  | 1.272(4)  |
| C(17)-H(17)  | 0.97(3)   |
| C(16)-N(1)   | 1.126(3)  |
| C(25)-C(24)  | 1.362(4)  |
| C(25)-H(25)  | 0.9300    |
| C(24)-C(23)  | 1.349(4)  |
| C(24)-H(24)  | 0.9300    |
| C(12)-H(12A) | 0.9700    |
| C(12)-H(12B) | 0.9700    |
| C(18)-H(18A) | 1.07(3)   |
| C(18)-H(18B) | 0.94(3)   |
| C(19)-H(19A) | 0.9600    |
| C(19)-H(19B) | 0.9600    |
| C(19)-H(19C) | 0.9600    |
| C(22)-C(23)  | 1.380(3)  |

|                    |            |
|--------------------|------------|
| C(22)-H(22)        | 0.9300     |
| C(23)-H(23)        | 0.9300     |
| C(3)-O(1)-C(20)    | 118.17(18) |
| C(7)-C(8)-C(14)    | 114.16(18) |
| C(7)-C(8)-C(9)     | 109.42(18) |
| C(14)-C(8)-C(9)    | 110.29(19) |
| C(7)-C(8)-H(8)     | 107.6      |
| C(14)-C(8)-H(8)    | 107.6      |
| C(9)-C(8)-H(8)     | 107.6      |
| C(5)-C(10)-C(1)    | 117.9(2)   |
| C(5)-C(10)-C(9)    | 122.2(2)   |
| C(1)-C(10)-C(9)    | 119.9(2)   |
| C(3)-C(4)-C(5)     | 120.7(2)   |
| C(3)-C(4)-H(4)     | 119.6      |
| C(5)-C(4)-H(4)     | 119.6      |
| C(11)-C(9)-C(10)   | 115.1(2)   |
| C(11)-C(9)-C(8)    | 110.0(2)   |
| C(10)-C(9)-C(8)    | 112.5(2)   |
| C(11)-C(9)-H(99)   | 106.0(12)  |
| C(10)-C(9)-H(99)   | 107.4(12)  |
| C(8)-C(9)-H(99)    | 105.1(11)  |
| C(2)-C(1)-C(10)    | 121.8(2)   |
| C(2)-C(1)-H(1)     | 119.1      |
| C(10)-C(1)-H(1)    | 119.1      |
| C(10)-C(5)-C(4)    | 120.1(2)   |
| C(10)-C(5)-C(6)    | 121.4(2)   |
| C(4)-C(5)-C(6)     | 118.5(2)   |
| C(5)-C(6)-C(7)     | 112.94(19) |
| C(5)-C(6)-H(6A)    | 109.0      |
| C(7)-C(6)-H(6A)    | 109.0      |
| C(5)-C(6)-H(6B)    | 109.0      |
| C(7)-C(6)-H(6B)    | 109.0      |
| H(6A)-C(6)-H(6B)   | 107.8      |
| C(3)-C(2)-C(1)     | 120.0(2)   |
| C(3)-C(2)-H(2)     | 120.0      |
| C(1)-C(2)-H(2)     | 120.0      |
| C(2)-C(3)-C(4)     | 119.4(2)   |
| C(2)-C(3)-O(1)     | 115.4(2)   |
| C(4)-C(3)-O(1)     | 125.1(2)   |
| C(8)-C(14)-C(15)   | 113.6(2)   |
| C(8)-C(14)-C(13)   | 114.01(19) |
| C(15)-C(14)-C(13)  | 112.6(2)   |
| C(8)-C(14)-H(14)   | 107.2(11)  |
| C(15)-C(14)-H(14)  | 103.5(11)  |
| C(13)-C(14)-H(14)  | 104.8(11)  |
| C(6)-C(7)-C(8)     | 109.90(18) |
| C(6)-C(7)-H(7A)    | 109.7      |
| C(8)-C(7)-H(7A)    | 109.7      |
| C(6)-C(7)-H(7B)    | 109.7      |
| C(8)-C(7)-H(7B)    | 109.7      |
| H(7A)-C(7)-H(7B)   | 108.2      |
| C(22)-C(21)-C(26)  | 117.7(2)   |
| C(22)-C(21)-C(20)  | 120.3(3)   |
| C(26)-C(21)-C(20)  | 122.0(3)   |
| O(1)-C(20)-C(21)   | 107.26(19) |
| O(1)-C(20)-H(20A)  | 110.3      |
| C(21)-C(20)-H(20A) | 110.3      |
| O(1)-C(20)-H(20B)  | 110.3      |
| C(21)-C(20)-H(20B) | 110.3      |

|                     |           |
|---------------------|-----------|
| H(20A)-C(20)-H(20B) | 108.5     |
| C(21)-C(26)-C(25)   | 121.6(3)  |
| C(21)-C(26)-H(26)   | 119.2     |
| C(25)-C(26)-H(26)   | 119.2     |
| C(17)-C(13)-C(19)   | 111.3(2)  |
| C(17)-C(13)-C(12)   | 107.3(2)  |
| C(19)-C(13)-C(12)   | 109.4(2)  |
| C(17)-C(13)-C(14)   | 108.5(2)  |
| C(19)-C(13)-C(14)   | 112.5(2)  |
| C(12)-C(13)-C(14)   | 107.7(2)  |
| C(9)-C(11)-C(12)    | 111.5(2)  |
| C(9)-C(11)-H(11A)   | 109.3     |
| C(12)-C(11)-H(11A)  | 109.3     |
| C(9)-C(11)-H(11B)   | 109.3     |
| C(12)-C(11)-H(11B)  | 109.3     |
| H(11A)-C(11)-H(11B) | 108.0     |
| C(16)-C(15)-C(14)   | 114.6(2)  |
| C(16)-C(15)-H(15A)  | 108.6     |
| C(14)-C(15)-H(15A)  | 108.6     |
| C(16)-C(15)-H(15B)  | 108.6     |
| C(14)-C(15)-H(15B)  | 108.6     |
| H(15A)-C(15)-H(15B) | 107.6     |
| C(18)-C(17)-C(13)   | 129.5(4)  |
| C(18)-C(17)-H(17)   | 118(2)    |
| C(13)-C(17)-H(17)   | 112.7(19) |
| N(1)-C(16)-C(15)    | 179.4(3)  |
| C(24)-C(25)-C(26)   | 119.2(3)  |
| C(24)-C(25)-H(25)   | 120.4     |
| C(26)-C(25)-H(25)   | 120.4     |
| C(23)-C(24)-C(25)   | 120.1(3)  |
| C(23)-C(24)-H(24)   | 120.0     |
| C(25)-C(24)-H(24)   | 120.0     |
| C(11)-C(12)-C(13)   | 114.5(2)  |
| C(11)-C(12)-H(12A)  | 108.6     |
| C(13)-C(12)-H(12A)  | 108.6     |
| C(11)-C(12)-H(12B)  | 108.6     |
| C(13)-C(12)-H(12B)  | 108.6     |
| H(12A)-C(12)-H(12B) | 107.6     |
| C(17)-C(18)-H(18A)  | 118.8(16) |
| C(17)-C(18)-H(18B)  | 114.8(19) |
| H(18A)-C(18)-H(18B) | 126(3)    |
| C(13)-C(19)-H(19A)  | 109.5     |
| C(13)-C(19)-H(19B)  | 109.5     |
| H(19A)-C(19)-H(19B) | 109.5     |
| C(13)-C(19)-H(19C)  | 109.5     |
| H(19A)-C(19)-H(19C) | 109.5     |
| H(19B)-C(19)-H(19C) | 109.5     |
| C(21)-C(22)-C(23)   | 121.6(3)  |
| C(21)-C(22)-H(22)   | 119.2     |
| C(23)-C(22)-H(22)   | 119.2     |
| C(24)-C(23)-C(22)   | 119.7(3)  |
| C(24)-C(23)-H(23)   | 120.2     |
| C(22)-C(23)-H(23)   | 120.2     |

---

Symmetry transformations used to generate equivalent atoms:



**Table 4.** Anisotropic displacement parameters ( $\text{\AA}^2 \times 10^3$ ) for **10**. The anisotropic displacement factor exponent takes the form:  $-2\pi^2[h^2 a^{*2} U^{11} + \dots + 2 h k a^* b^* U^{12}]$

|       | U <sup>11</sup> | U <sup>22</sup> | U <sup>33</sup> | U <sup>23</sup> | U <sup>13</sup> | U <sup>12</sup> |
|-------|-----------------|-----------------|-----------------|-----------------|-----------------|-----------------|
| O(1)  | 87(1)           | 82(1)           | 66(1)           | -13(1)          | 5(1)            | -14(1)          |
| C(8)  | 59(2)           | 51(1)           | 65(2)           | -1(1)           | 2(1)            | 4(1)            |
| C(10) | 54(2)           | 49(1)           | 68(2)           | -4(1)           | -2(1)           | -2(1)           |
| C(4)  | 64(2)           | 55(1)           | 69(2)           | -5(1)           | 3(2)            | -5(1)           |
| C(9)  | 63(2)           | 60(2)           | 70(2)           | -1(1)           | -2(2)           | 2(2)            |
| C(1)  | 68(2)           | 66(2)           | 77(2)           | -2(2)           | 0(2)            | -16(1)          |
| C(5)  | 55(2)           | 49(1)           | 64(2)           | -5(1)           | -1(1)           | 2(1)            |
| C(6)  | 79(2)           | 52(1)           | 71(2)           | -6(1)           | 4(2)            | -5(1)           |
| C(2)  | 68(2)           | 73(2)           | 72(2)           | -16(1)          | -6(2)           | -15(2)          |
| C(3)  | 63(2)           | 63(2)           | 58(2)           | -8(1)           | 2(1)            | -2(2)           |
| C(14) | 58(2)           | 67(2)           | 73(2)           | 1(1)            | -2(2)           | 6(2)            |
| C(7)  | 85(2)           | 52(1)           | 65(2)           | -6(1)           | 4(2)            | 1(1)            |
| C(21) | 71(2)           | 61(1)           | 67(2)           | -4(1)           | 0(2)            | 3(2)            |
| C(20) | 82(2)           | 67(2)           | 71(2)           | -9(1)           | 7(2)            | -4(2)           |
| C(26) | 73(2)           | 83(2)           | 71(2)           | -6(1)           | 3(2)            | -15(2)          |
| C(13) | 76(2)           | 66(2)           | 75(2)           | 8(1)            | 3(2)            | -2(2)           |
| C(11) | 105(2)          | 72(2)           | 79(2)           | -2(2)           | -1(2)           | -27(2)          |
| C(15) | 98(2)           | 61(2)           | 71(2)           | -6(1)           | 13(2)           | 5(2)            |
| C(17) | 110(3)          | 105(2)          | 68(2)           | 22(2)           | 15(2)           | -7(2)           |
| C(16) | 92(2)           | 69(2)           | 68(2)           | -14(1)          | 7(2)            | -14(2)          |
| C(25) | 87(2)           | 92(2)           | 87(2)           | -11(2)          | 24(2)           | -20(2)          |
| C(24) | 126(3)          | 99(2)           | 62(2)           | -2(2)           | 2(2)            | -8(2)           |
| N(1)  | 98(2)           | 107(2)          | 137(2)          | -20(2)          | -2(2)           | -22(2)          |
| C(12) | 110(2)          | 89(2)           | 81(2)           | 9(2)            | 1(2)            | -34(2)          |
| C(18) | 116(3)          | 114(3)          | 99(3)           | 9(2)            | 22(3)           | -7(3)           |
| C(19) | 110(2)          | 71(2)           | 96(2)           | 13(2)           | -5(2)           | 3(2)            |
| C(22) | 89(2)           | 152(3)          | 78(2)           | -28(2)          | -8(2)           | 37(2)           |
| C(23) | 118(3)          | 153(3)          | 82(2)           | -10(2)          | -22(2)          | 35(3)           |

**Table 5.** Hydrogen coordinates ( $\times 10^4$ ) and isotropic displacement parameters ( $\text{\AA}^2 \times 10^3$ ) for **10**.

|        | x        | y        | z         | U(eq)   |
|--------|----------|----------|-----------|---------|
| H(8)   | 4703     | 8810     | 10276     | 70      |
| H(4)   | 5295     | 9934     | 7660      | 75      |
| H(1)   | 2669     | 6981     | 8485      | 84      |
| H(6A)  | 4860     | 11054    | 8857      | 81      |
| H(6B)  | 5686     | 10101    | 9270      | 81      |
| H(2)   | 3307     | 7008     | 7230      | 85      |
| H(7A)  | 3314     | 10774    | 9729      | 81      |
| H(7B)  | 4508     | 10946    | 10214     | 81      |
| H(20A) | 6271     | 9245     | 6533      | 88      |
| H(20B) | 5180     | 10105    | 6323      | 88      |
| H(26)  | 7437     | 8572     | 5479      | 91      |
| H(11A) | 3794     | 6764     | 10043     | 102     |
| H(11B) | 2495     | 6663     | 9673      | 102     |
| H(15A) | 3710     | 10949    | 11411     | 92      |
| H(15B) | 3596     | 10017    | 12082     | 92      |
| H(25)  | 7701     | 8163     | 4191      | 107     |
| H(24)  | 6118     | 8475     | 3351      | 115     |
| H(12A) | 2387     | 6373     | 11005     | 112     |
| H(12B) | 1605     | 7487     | 10757     | 112     |
| H(19A) | 4159     | 6583     | 11804     | 138     |
| H(19B) | 4731     | 7845     | 11987     | 138     |
| H(19C) | 4826     | 7307     | 11155     | 138     |
| H(22)  | 3999     | 9401     | 5101      | 127     |
| H(23)  | 4264     | 9063     | 3806      | 141     |
| H(14)  | 2519(17) | 9549(15) | 10954(10) | 47(6)   |
| H(99)  | 2359(18) | 8735(16) | 9677(11)  | 54(7)   |
| H(17)  | 1540(30) | 8550(30) | 11967(18) | 149(15) |
| H(18A) | 1780(30) | 7990(20) | 13199(17) | 133(12) |
| H(18B) | 3280(30) | 7570(30) | 12889(17) | 115(13) |

**Table 6.** Torsion angles [°] for **10**.

|                         |            |
|-------------------------|------------|
| C(5)-C(10)-C(9)-C(11)   | -143.9(2)  |
| C(1)-C(10)-C(9)-C(11)   | 39.0(3)    |
| C(5)-C(10)-C(9)-C(8)    | -16.8(3)   |
| C(1)-C(10)-C(9)-C(8)    | 166.0(2)   |
| C(7)-C(8)-C(9)-C(11)    | 176.9(2)   |
| C(14)-C(8)-C(9)-C(11)   | -56.7(3)   |
| C(7)-C(8)-C(9)-C(10)    | 47.2(3)    |
| C(14)-C(8)-C(9)-C(10)   | 173.5(2)   |
| C(5)-C(10)-C(1)-C(2)    | 1.2(3)     |
| C(9)-C(10)-C(1)-C(2)    | 178.5(2)   |
| C(1)-C(10)-C(5)-C(4)    | -1.2(3)    |
| C(9)-C(10)-C(5)-C(4)    | -178.4(2)  |
| C(1)-C(10)-C(5)-C(6)    | 179.4(2)   |
| C(9)-C(10)-C(5)-C(6)    | 2.2(3)     |
| C(3)-C(4)-C(5)-C(10)    | 0.9(3)     |
| C(3)-C(4)-C(5)-C(6)     | -179.7(2)  |
| C(10)-C(5)-C(6)-C(7)    | -18.7(3)   |
| C(4)-C(5)-C(6)-C(7)     | 161.91(19) |
| C(10)-C(1)-C(2)-C(3)    | -0.9(4)    |
| C(1)-C(2)-C(3)-C(4)     | 0.5(3)     |
| C(1)-C(2)-C(3)-O(1)     | -179.1(2)  |
| C(5)-C(4)-C(3)-C(2)     | -0.5(3)    |
| C(5)-C(4)-C(3)-O(1)     | 179.0(2)   |
| C(20)-O(1)-C(3)-C(2)    | -177.8(2)  |
| C(20)-O(1)-C(3)-C(4)    | 2.6(3)     |
| C(7)-C(8)-C(14)-C(15)   | -49.0(3)   |
| C(9)-C(8)-C(14)-C(15)   | -172.7(2)  |
| C(7)-C(8)-C(14)-C(13)   | -179.9(2)  |
| C(9)-C(8)-C(14)-C(13)   | 56.5(3)    |
| C(5)-C(6)-C(7)-C(8)     | 49.6(2)    |
| C(14)-C(8)-C(7)-C(6)    | 171.31(19) |
| C(9)-C(8)-C(7)-C(6)     | -64.6(2)   |
| C(3)-O(1)-C(20)-C(21)   | 179.2(2)   |
| C(22)-C(21)-C(20)-O(1)  | 66.3(3)    |
| C(26)-C(21)-C(20)-O(1)  | -115.0(2)  |
| C(22)-C(21)-C(26)-C(25) | -0.4(4)    |
| C(20)-C(21)-C(26)-C(25) | -179.2(2)  |
| C(8)-C(14)-C(13)-C(17)  | -168.1(2)  |
| C(15)-C(14)-C(13)-C(17) | 60.5(3)    |
| C(8)-C(14)-C(13)-C(19)  | 68.3(3)    |
| C(15)-C(14)-C(13)-C(19) | -63.1(3)   |
| C(8)-C(14)-C(13)-C(12)  | -52.3(3)   |
| C(15)-C(14)-C(13)-C(12) | 176.3(2)   |
| C(10)-C(9)-C(11)-C(12)  | -175.0(2)  |
| C(8)-C(9)-C(11)-C(12)   | 56.7(3)    |
| C(8)-C(14)-C(15)-C(16)  | -48.7(3)   |
| C(13)-C(14)-C(15)-C(16) | 82.8(3)    |
| C(19)-C(13)-C(17)-C(18) | 0.9(5)     |
| C(12)-C(13)-C(17)-C(18) | 120.5(4)   |
| C(14)-C(13)-C(17)-C(18) | -123.4(4)  |
| C(14)-C(15)-C(16)-N(1)  | 159(100)   |
| C(21)-C(26)-C(25)-C(24) | 1.9(4)     |
| C(26)-C(25)-C(24)-C(23) | -2.1(4)    |
| C(9)-C(11)-C(12)-C(13)  | -56.3(3)   |
| C(17)-C(13)-C(12)-C(11) | 168.5(3)   |
| C(19)-C(13)-C(12)-C(11) | -70.7(3)   |
| C(14)-C(13)-C(12)-C(11) | 51.9(3)    |
| C(26)-C(21)-C(22)-C(23) | -0.8(4)    |

|                         |          |
|-------------------------|----------|
| C(20)-C(21)-C(22)-C(23) | 178.0(3) |
| C(25)-C(24)-C(23)-C(22) | 0.9(5)   |
| C(21)-C(22)-C(23)-C(24) | 0.6(5)   |

Symmetry transformations used to generate equivalent atoms:

**ORTEP PLOT for compound 10 with 30% thermal ellipsoids**

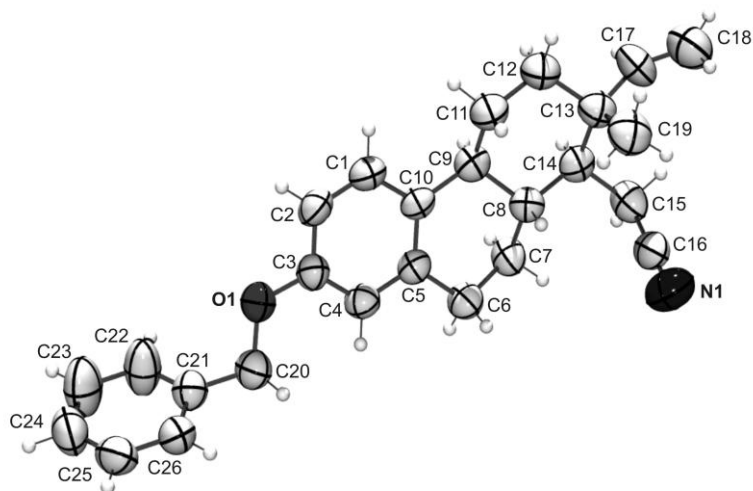

### X-ray crystal structure of compound 11

Table 1. Crystal data and structure refinement for compound 11.

|                                   |                                                               |                     |
|-----------------------------------|---------------------------------------------------------------|---------------------|
| Empirical formula                 | C <sub>21</sub> H <sub>30</sub> N <sub>4</sub> O <sub>2</sub> |                     |
| Formula weight                    | 370.49                                                        |                     |
| Temperature                       | 293(2) K                                                      |                     |
| Wavelength                        | 0.71073 Å                                                     |                     |
| Crystal system                    | Orthorhombic                                                  |                     |
| Space group                       | P 21 21 21                                                    |                     |
| Unit cell dimensions              | a = 8.099(5) Å                                                | $\alpha = 90^\circ$ |
|                                   | b = 10.195(5) Å                                               | $\beta = 90^\circ$  |
|                                   | c = 24.458(5) Å                                               | $\gamma = 90^\circ$ |
| Volume                            | 2019.5(16) Å <sup>3</sup>                                     |                     |
| Z                                 | 4                                                             |                     |
| Density (calculated)              | 1.219 Mg/m <sup>3</sup>                                       |                     |
| Absorption coefficient            | 0.080 mm <sup>-1</sup>                                        |                     |
| F(000)                            | 800                                                           |                     |
| Crystal size                      | 0.188 x 0.170 x 0.055 mm <sup>3</sup>                         |                     |
| Theta range for data collection   | 3.02 to 25.00°                                                |                     |
| Index ranges                      | -6 ≤ h ≤ 9, -12 ≤ k ≤ 7, -16 ≤ l ≤ 29                         |                     |
| Reflections collected             | 5358                                                          |                     |
| Independent reflections           | 3442 [R(int) = 0.0458]                                        |                     |
| Completeness to theta = 25.00°    | 99.5 %                                                        |                     |
| Absorption correction             | Semi-empirical from equivalents                               |                     |
| Max. and min. transmission        | 1.00000 and 0.21327                                           |                     |
| Refinement method                 | Full-matrix least-squares on F <sup>2</sup>                   |                     |
| Data / restraints / parameters    | 3442 / 0 / 251                                                |                     |
| Goodness-of-fit on F <sup>2</sup> | 0.869                                                         |                     |
| Final R indices [I > 2σ(I)]       | R1 = 0.0548, wR2 = 0.1187                                     |                     |
| R indices (all data)              | R1 = 0.0998, wR2 = 0.1318                                     |                     |
| Absolute structure parameter      | 0(3)                                                          |                     |
| Largest diff. peak and hole       | 0.183 and -0.186 e.Å <sup>-3</sup>                            |                     |

Table 2. Atomic coordinates ( $\times 10^4$ ) and equivalent isotropic displacement parameters ( $\text{\AA}^2 \times 10^3$ ) for **11**. U(eq) is defined as one third of the trace of the orthogonalized  $U^{ij}$  tensor.

|        | x        | y        | z        | U(eq)  |
|--------|----------|----------|----------|--------|
| C(6)   | 15956(4) | -4019(4) | 7740(1)  | 57(1)  |
| O(1)   | 16697(4) | -3272(3) | 5842(1)  | 84(1)  |
| C(8)   | 13262(3) | -3901(3) | 8255(1)  | 39(1)  |
| C(10)  | 13393(4) | -3583(3) | 7220(1)  | 45(1)  |
| C(14)  | 12530(4) | -3469(3) | 8797(1)  | 44(1)  |
| C(15)  | 13020(4) | -4381(3) | 9266(1)  | 50(1)  |
| C(9)   | 12716(3) | -3073(3) | 7770(1)  | 44(1)  |
| N(1)   | 10789(4) | -3332(4) | 9769(1)  | 77(1)  |
| C(5)   | 15198(4) | -3932(3) | 7272(1)  | 46(1)  |
| C(16)  | 12077(4) | -4111(4) | 9771(1)  | 53(1)  |
| N(4)   | 12286(4) | -4575(3) | 10262(1) | 68(1)  |
| C(4)   | 16135(4) | -4152(4) | 6748(1)  | 64(1)  |
| C(3)   | 15932(4) | -2994(4) | 6368(1)  | 62(1)  |
| C(11)  | 10844(4) | -2878(4) | 7765(1)  | 71(1)  |
| C(1)   | 13232(4) | -2477(4) | 6796(1)  | 61(1)  |
| C(2)   | 14152(4) | -2735(4) | 6260(1)  | 67(1)  |
| O(2)   | 19147(4) | -2762(5) | 6173(2)  | 137(2) |
| C(7)   | 15155(4) | -3880(4) | 8285(1)  | 55(1)  |
| C(13)  | 10621(4) | -3309(4) | 8775(1)  | 62(1)  |
| N(3)   | 11099(5) | -4006(4) | 10569(1) | 84(1)  |
| N(2)   | 10166(5) | -3271(4) | 10280(2) | 94(1)  |
| C(19)  | 12444(5) | -4782(4) | 7023(1)  | 71(1)  |
| C(12)  | 10217(4) | -2382(4) | 8307(1)  | 77(1)  |
| C(18)  | 9727(4)  | -4616(5) | 8723(2)  | 82(1)  |
| C(17A) | 10092(5) | -2623(5) | 9304(2)  | 95(2)  |
| C(20)  | 18315(7) | -3088(6) | 5799(2)  | 99(2)  |
| C(21)  | 18929(7) | -3410(8) | 5240(2)  | 159(3) |

Table 3. Bond lengths [Å] and angles [°] for **11**.

|               |          |
|---------------|----------|
| C(6)-C(5)     | 1.303(4) |
| C(6)-C(7)     | 1.487(4) |
| C(6)-H(6)     | 1.00(3)  |
| O(1)-C(20)    | 1.328(5) |
| O(1)-C(3)     | 1.457(4) |
| C(8)-C(14)    | 1.517(4) |
| C(8)-C(9)     | 1.521(4) |
| C(8)-C(7)     | 1.535(4) |
| C(8)-H(8)     | 0.9800   |
| C(10)-C(5)    | 1.511(4) |
| C(10)-C(19)   | 1.523(4) |
| C(10)-C(1)    | 1.536(4) |
| C(10)-C(9)    | 1.544(4) |
| C(14)-C(15)   | 1.530(4) |
| C(14)-C(13)   | 1.556(4) |
| C(14)-H(14)   | 0.9800   |
| C(15)-C(16)   | 1.477(4) |
| C(15)-H(15A)  | 0.9700   |
| C(15)-H(15B)  | 0.9700   |
| C(9)-C(11)    | 1.529(4) |
| C(9)-H(9)     | 0.9800   |
| N(1)-C(16)    | 1.311(4) |
| N(1)-N(2)     | 1.349(4) |
| N(1)-C(17A)   | 1.460(5) |
| C(5)-C(4)     | 1.506(4) |
| C(16)-N(4)    | 1.301(4) |
| N(4)-N(3)     | 1.350(4) |
| C(4)-C(3)     | 1.511(5) |
| C(4)-H(4A)    | 0.9700   |
| C(4)-H(4B)    | 0.9700   |
| C(3)-C(2)     | 1.489(5) |
| C(3)-H(3)     | 0.9800   |
| C(11)-C(12)   | 1.507(5) |
| C(11)-H(11A)  | 0.9700   |
| C(11)-H(11B)  | 0.9700   |
| C(1)-C(2)     | 1.531(4) |
| C(1)-H(1A)    | 0.9700   |
| C(1)-H(1B)    | 0.9700   |
| C(2)-H(2A)    | 0.9700   |
| C(2)-H(2B)    | 0.9700   |
| O(2)-C(20)    | 1.183(6) |
| C(7)-H(7A)    | 0.9700   |
| C(7)-H(7B)    | 0.9700   |
| C(13)-C(12)   | 1.520(4) |
| C(13)-C(18)   | 1.522(5) |
| C(13)-C(17A)  | 1.532(5) |
| N(3)-N(2)     | 1.278(4) |
| C(19)-H(19A)  | 0.9600   |
| C(19)-H(19B)  | 0.9600   |
| C(19)-H(19C)  | 0.9600   |
| C(12)-H(12A)  | 0.9700   |
| C(12)-H(12B)  | 0.9700   |
| C(18)-H(18A)  | 0.9600   |
| C(18)-H(18B)  | 0.9600   |
| C(18)-H(18C)  | 0.9600   |
| C(17A)-H(17A) | 0.9700   |
| C(17A)-H(17B) | 0.9700   |
| C(20)-C(21)   | 1.491(7) |

|                     |           |
|---------------------|-----------|
| C(21)-H(21A)        | 0.9600    |
| C(21)-H(21B)        | 0.9600    |
| C(21)-H(21C)        | 0.9600    |
| C(5)-C(6)-C(7)      | 125.1(3)  |
| C(5)-C(6)-H(6)      | 119.9(17) |
| C(7)-C(6)-H(6)      | 114.6(17) |
| C(20)-O(1)-C(3)     | 117.5(3)  |
| C(14)-C(8)-C(9)     | 113.9(2)  |
| C(14)-C(8)-C(7)     | 110.2(2)  |
| C(9)-C(8)-C(7)      | 108.7(2)  |
| C(14)-C(8)-H(8)     | 108.0     |
| C(9)-C(8)-H(8)      | 108.0     |
| C(7)-C(8)-H(8)      | 108.0     |
| C(5)-C(10)-C(19)    | 109.0(3)  |
| C(5)-C(10)-C(1)     | 108.2(3)  |
| C(19)-C(10)-C(1)    | 109.5(3)  |
| C(5)-C(10)-C(9)     | 110.4(2)  |
| C(19)-C(10)-C(9)    | 111.5(3)  |
| C(1)-C(10)-C(9)     | 108.1(2)  |
| C(8)-C(14)-C(15)    | 112.2(2)  |
| C(8)-C(14)-C(13)    | 112.9(2)  |
| C(15)-C(14)-C(13)   | 110.3(3)  |
| C(8)-C(14)-H(14)    | 107.0     |
| C(15)-C(14)-H(14)   | 107.0     |
| C(13)-C(14)-H(14)   | 107.0     |
| C(16)-C(15)-C(14)   | 112.4(3)  |
| C(16)-C(15)-H(15A)  | 109.1     |
| C(14)-C(15)-H(15A)  | 109.1     |
| C(16)-C(15)-H(15B)  | 109.1     |
| C(14)-C(15)-H(15B)  | 109.1     |
| H(15A)-C(15)-H(15B) | 107.9     |
| C(8)-C(9)-C(11)     | 111.6(3)  |
| C(8)-C(9)-C(10)     | 112.9(2)  |
| C(11)-C(9)-C(10)    | 112.8(3)  |
| C(8)-C(9)-H(9)      | 106.3     |
| C(11)-C(9)-H(9)     | 106.3     |
| C(10)-C(9)-H(9)     | 106.3     |
| C(16)-N(1)-N(2)     | 108.7(3)  |
| C(16)-N(1)-C(17A)   | 127.7(3)  |
| N(2)-N(1)-C(17A)    | 123.6(4)  |
| C(6)-C(5)-C(4)      | 120.1(3)  |
| C(6)-C(5)-C(10)     | 123.1(3)  |
| C(4)-C(5)-C(10)     | 116.8(3)  |
| N(4)-C(16)-N(1)     | 109.1(3)  |
| N(4)-C(16)-C(15)    | 129.5(3)  |
| N(1)-C(16)-C(15)    | 121.3(3)  |
| C(16)-N(4)-N(3)     | 105.3(3)  |
| C(5)-C(4)-C(3)      | 110.6(3)  |
| C(5)-C(4)-H(4A)     | 109.5     |
| C(3)-C(4)-H(4A)     | 109.5     |
| C(5)-C(4)-H(4B)     | 109.5     |
| C(3)-C(4)-H(4B)     | 109.5     |
| H(4A)-C(4)-H(4B)    | 108.1     |
| O(1)-C(3)-C(2)      | 106.8(3)  |
| O(1)-C(3)-C(4)      | 110.1(3)  |
| C(2)-C(3)-C(4)      | 110.7(3)  |
| O(1)-C(3)-H(3)      | 109.7     |
| C(2)-C(3)-H(3)      | 109.7     |
| C(4)-C(3)-H(3)      | 109.7     |



|                      |          |
|----------------------|----------|
| C(12)-C(11)-C(9)     | 111.7(3) |
| C(12)-C(11)-H(11A)   | 109.3    |
| C(9)-C(11)-H(11A)    | 109.3    |
| C(12)-C(11)-H(11B)   | 109.3    |
| C(9)-C(11)-H(11B)    | 109.3    |
| H(11A)-C(11)-H(11B)  | 107.9    |
| C(2)-C(1)-C(10)      | 114.2(3) |
| C(2)-C(1)-H(1A)      | 108.7    |
| C(10)-C(1)-H(1A)     | 108.7    |
| C(2)-C(1)-H(1B)      | 108.7    |
| C(10)-C(1)-H(1B)     | 108.7    |
| H(1A)-C(1)-H(1B)     | 107.6    |
| C(3)-C(2)-C(1)       | 110.4(3) |
| C(3)-C(2)-H(2A)      | 109.6    |
| C(1)-C(2)-H(2A)      | 109.6    |
| C(3)-C(2)-H(2B)      | 109.6    |
| C(1)-C(2)-H(2B)      | 109.6    |
| H(2A)-C(2)-H(2B)     | 108.1    |
| C(6)-C(7)-C(8)       | 113.1(3) |
| C(6)-C(7)-H(7A)      | 109.0    |
| C(8)-C(7)-H(7A)      | 109.0    |
| C(6)-C(7)-H(7B)      | 109.0    |
| C(8)-C(7)-H(7B)      | 109.0    |
| H(7A)-C(7)-H(7B)     | 107.8    |
| C(12)-C(13)-C(18)    | 112.3(3) |
| C(12)-C(13)-C(17A)   | 107.0(3) |
| C(18)-C(13)-C(17A)   | 109.7(3) |
| C(12)-C(13)-C(14)    | 107.8(3) |
| C(18)-C(13)-C(14)    | 112.6(3) |
| C(17A)-C(13)-C(14)   | 107.3(3) |
| N(2)-N(3)-N(4)       | 111.4(3) |
| N(3)-N(2)-N(1)       | 105.3(3) |
| C(10)-C(19)-H(19A)   | 109.5    |
| C(10)-C(19)-H(19B)   | 109.5    |
| H(19A)-C(19)-H(19B)  | 109.5    |
| C(10)-C(19)-H(19C)   | 109.5    |
| H(19A)-C(19)-H(19C)  | 109.5    |
| H(19B)-C(19)-H(19C)  | 109.5    |
| C(11)-C(12)-C(13)    | 112.4(3) |
| C(11)-C(12)-H(12A)   | 109.1    |
| C(13)-C(12)-H(12A)   | 109.1    |
| C(11)-C(12)-H(12B)   | 109.1    |
| C(13)-C(12)-H(12B)   | 109.1    |
| H(12A)-C(12)-H(12B)  | 107.9    |
| C(13)-C(18)-H(18A)   | 109.5    |
| C(13)-C(18)-H(18B)   | 109.5    |
| H(18A)-C(18)-H(18B)  | 109.5    |
| C(13)-C(18)-H(18C)   | 109.5    |
| H(18A)-C(18)-H(18C)  | 109.5    |
| H(18B)-C(18)-H(18C)  | 109.5    |
| N(1)-C(17A)-C(13)    | 108.9(3) |
| N(1)-C(17A)-H(17A)   | 109.9    |
| C(13)-C(17A)-H(17A)  | 109.9    |
| N(1)-C(17A)-H(17B)   | 109.9    |
| C(13)-C(17A)-H(17B)  | 109.9    |
| H(17A)-C(17A)-H(17B) | 108.3    |
| O(2)-C(20)-O(1)      | 122.8(5) |
| O(2)-C(20)-C(21)     | 125.4(5) |
| O(1)-C(20)-C(21)     | 111.7(5) |
| C(20)-C(21)-H(21A)   | 109.5    |

|                     |       |
|---------------------|-------|
| C(20)-C(21)-H(21B)  | 109.5 |
| H(21A)-C(21)-H(21B) | 109.5 |
| C(20)-C(21)-H(21C)  | 109.5 |
| H(21A)-C(21)-H(21C) | 109.5 |
| H(21B)-C(21)-H(21C) | 109.5 |

---

Symmetry transformations used to generate equivalent atoms:

Table 4. Anisotropic displacement parameters ( $\text{\AA}^2 \times 10^3$ ) for **11**. The anisotropic displacement factor exponent takes the form:  
 $-2\pi^2 [ h^2 a^{*2} U^{11} + \dots + 2 h k a^* b^* U^{12} ]$

|        | U <sup>11</sup> | U <sup>22</sup> | U <sup>33</sup> | U <sup>23</sup> | U <sup>13</sup> | U <sup>12</sup> |
|--------|-----------------|-----------------|-----------------|-----------------|-----------------|-----------------|
| C(6)   | 49(2)           | 75(3)           | 46(2)           | 5(2)            | 3(2)            | 8(2)            |
| O(1)   | 90(2)           | 112(2)          | 51(2)           | 6(2)            | 11(1)           | -1(2)           |
| C(8)   | 39(2)           | 39(2)           | 38(2)           | -1(2)           | -7(1)           | 2(2)            |
| C(10)  | 57(2)           | 39(2)           | 39(2)           | 4(2)            | -11(2)          | -4(2)           |
| C(14)  | 47(2)           | 44(2)           | 40(2)           | -1(2)           | -4(1)           | 9(2)            |
| C(15)  | 54(2)           | 59(2)           | 39(2)           | 1(2)            | -4(1)           | 6(2)            |
| C(9)   | 46(2)           | 42(2)           | 45(2)           | 1(2)            | -7(1)           | 7(2)            |
| N(1)   | 96(2)           | 84(3)           | 49(2)           | 8(2)            | 14(2)           | 27(2)           |
| C(5)   | 52(2)           | 43(2)           | 43(2)           | 2(2)            | 0(2)            | 7(2)            |
| C(16)  | 58(2)           | 56(2)           | 44(2)           | 5(2)            | -1(2)           | 7(2)            |
| N(4)   | 71(2)           | 87(2)           | 48(2)           | 7(2)            | 4(2)            | -3(2)           |
| C(4)   | 72(2)           | 68(3)           | 52(2)           | 2(2)            | 2(2)            | 6(2)            |
| C(3)   | 78(2)           | 70(3)           | 39(2)           | -2(2)           | 2(2)            | -2(2)           |
| C(11)  | 59(2)           | 96(3)           | 58(2)           | 17(2)           | -5(2)           | 31(2)           |
| C(1)   | 71(2)           | 70(2)           | 41(2)           | 7(2)            | -10(2)          | 1(2)            |
| C(2)   | 91(3)           | 75(3)           | 36(2)           | 7(2)            | -5(2)           | 7(2)            |
| O(2)   | 82(2)           | 193(5)          | 136(3)          | 4(3)            | 8(2)            | -15(3)          |
| C(7)   | 43(2)           | 76(3)           | 47(2)           | 2(2)            | -9(2)           | 4(2)            |
| C(13)  | 56(2)           | 71(3)           | 59(2)           | 12(2)           | 6(2)            | 31(2)           |
| N(3)   | 101(3)          | 96(3)           | 55(2)           | 8(2)            | 13(2)           | 3(2)            |
| N(2)   | 119(3)          | 102(3)          | 62(2)           | 4(2)            | 35(2)           | 23(3)           |
| C(19)  | 79(2)           | 76(3)           | 58(2)           | -13(2)          | -2(2)           | -21(2)          |
| C(12)  | 68(2)           | 96(3)           | 67(2)           | 24(2)           | 7(2)            | 48(2)           |
| C(18)  | 49(2)           | 115(4)          | 80(3)           | 17(3)           | -7(2)           | -9(2)           |
| C(17A) | 105(3)          | 102(4)          | 77(3)           | 14(3)           | 25(2)           | 63(3)           |
| C(20)  | 88(4)           | 114(4)          | 97(4)           | 26(4)           | 12(3)           | 13(4)           |
| C(21)  | 158(5)          | 241(7)          | 78(3)           | 34(4)           | 66(3)           | 72(5)           |

Table 5. Hydrogen coordinates ( $\times 10^4$ ) and isotropic displacement parameters ( $\text{\AA}^2 \times 10^3$ ) for **11**.

|        | x         | y         | z        | U(eq) |
|--------|-----------|-----------|----------|-------|
| H(8)   | 12913     | -4807     | 8187     | 46    |
| H(14)  | 12993     | -2603     | 8879     | 52    |
| H(15A) | 12834     | -5283     | 9156     | 60    |
| H(15B) | 14189     | -4277     | 9341     | 60    |
| H(9)   | 13201     | -2202     | 7825     | 53    |
| H(4A)  | 15729     | -4939     | 6570     | 77    |
| H(4B)  | 17296     | -4279     | 6829     | 77    |
| H(3)   | 16443     | -2215     | 6531     | 75    |
| H(11A) | 10555     | -2255     | 7481     | 85    |
| H(11B) | 10311     | -3705     | 7680     | 85    |
| H(1A)  | 12071     | -2346     | 6715     | 73    |
| H(1B)  | 13649     | -1672     | 6956     | 73    |
| H(2A)  | 13667     | -3484     | 6076     | 81    |
| H(2B)  | 14044     | -1979     | 6022     | 81    |
| H(7A)  | 15507     | -3061     | 8449     | 66    |
| H(7B)  | 15523     | -4589     | 8519     | 66    |
| H(19A) | 12959     | -5125     | 6699     | 106   |
| H(19B) | 11326     | -4538     | 6941     | 106   |
| H(19C) | 12449     | -5440     | 7304     | 106   |
| H(12A) | 9029      | -2269     | 8286     | 92    |
| H(12B) | 10703     | -1531     | 8381     | 92    |
| H(18A) | 9846      | -5102     | 9057     | 123   |
| H(18B) | 10193     | -5108     | 8427     | 123   |
| H(18C) | 8576      | -4461     | 8654     | 123   |
| H(17A) | 10484     | -1724     | 9304     | 114   |
| H(17B) | 8897      | -2610     | 9330     | 114   |
| H(21A) | 18799     | -2660     | 5007     | 239   |
| H(21B) | 18308     | -4132     | 5095     | 239   |
| H(21C) | 20076     | -3645     | 5259     | 239   |
| H(6)   | 17150(40) | -4280(30) | 7753(12) | 63(9) |

**ORTEP PLOT for compound 11 with 30% thermal ellipsoids**

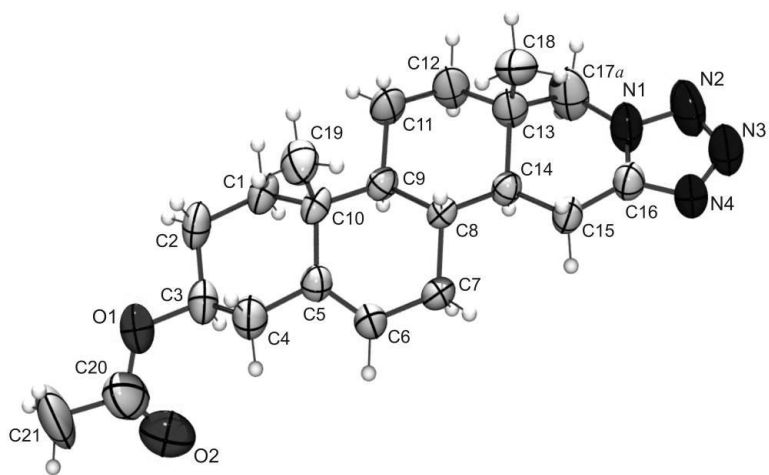

**X-ray crystal structure of compound 14.**

Table 1. Crystal data and structure refinement for compound 14.

|                                   |                                                  |                |
|-----------------------------------|--------------------------------------------------|----------------|
| Empirical formula                 | C <sub>26</sub> H <sub>30</sub> N <sub>4</sub> O |                |
| Formula weight                    | 414.54                                           |                |
| Temperature                       | 293(2) K                                         |                |
| Wavelength                        | 1.54180 Å                                        |                |
| Crystal system                    | Monoclinic                                       |                |
| Space group                       | P 21                                             |                |
| Unit cell dimensions              | a = 9.039(5) Å                                   | α = 90°        |
|                                   | b = 12.320(5) Å                                  | β = 93.034(5)° |
|                                   | c = 9.996(5) Å                                   | γ = 90°        |
| Volume                            | 1111.6(9) Å <sup>3</sup>                         |                |
| Z                                 | 2                                                |                |
| Density (calculated)              | 1.239 Mg/m <sup>3</sup>                          |                |
| Absorption coefficient            | 0.603 mm <sup>-1</sup>                           |                |
| F(000)                            | 444                                              |                |
| Crystal size                      | 0.282 x 0.185 x 0.023 mm <sup>3</sup>            |                |
| Theta range for data collection   | 4.43 to 72.25°                                   |                |
| Index ranges                      | -10 ≤ h ≤ 11, -10 ≤ k ≤ 15, -10 ≤ l ≤ 12         |                |
| Reflections collected             | 3829                                             |                |
| Independent reflections           | 2627 [R(int) = 0.0221]                           |                |
| Completeness to theta = 67.50°    | 96.9 %                                           |                |
| Absorption correction             | Semi-empirical from equivalents                  |                |
| Max. and min. transmission        | 1.00000 and 0.95325                              |                |
| Refinement method                 | Full-matrix least-squares on F <sup>2</sup>      |                |
| Data / restraints / parameters    | 2627 / 1 / 374                                   |                |
| Goodness-of-fit on F <sup>2</sup> | 1.068                                            |                |
| Final R indices [I > 2σ(I)]       | R1 = 0.0377, wR2 = 0.0941                        |                |
| R indices (all data)              | R1 = 0.0458, wR2 = 0.1015                        |                |
| Absolute structure parameter      | -0.2(4)                                          |                |
| Extinction coefficient            | 0.0017(4)                                        |                |
| Largest diff. peak and hole       | 0.174 and -0.129 e.Å <sup>-3</sup>               |                |

Table 2. Atomic coordinates ( $\times 10^4$ ) and equivalent isotropic displacement parameters ( $\text{\AA}^2 \times 10^3$ ) for **14**.  $U(\text{eq})$  is defined as one third of the trace of the orthogonalized  $U^{ij}$  tensor.

|        | x        | y        | z       | $U(\text{eq})$ |
|--------|----------|----------|---------|----------------|
| O(1)   | 6070(2)  | 4659(2)  | 3132(2) | 67(1)          |
| C(14)  | 8574(3)  | -887(2)  | 6379(3) | 54(1)          |
| C(20)  | 6267(3)  | 5745(2)  | 3608(3) | 57(1)          |
| C(13)  | 8970(3)  | -677(2)  | 7892(3) | 53(1)          |
| C(1)   | 8287(3)  | 3119(2)  | 5674(3) | 52(1)          |
| C(2)   | 7581(3)  | 4001(3)  | 5065(3) | 56(1)          |
| C(5)   | 7368(3)  | 1938(2)  | 3929(3) | 58(1)          |
| N(1)   | 8987(3)  | -2657(2) | 8077(3) | 69(1)          |
| C(12)  | 10014(4) | 292(3)   | 7983(3) | 63(1)          |
| C(10)  | 8222(3)  | 2084(2)  | 5130(3) | 52(1)          |
| C(4)   | 6670(4)  | 2822(2)  | 3317(3) | 60(1)          |
| C(21)  | 5698(3)  | 6513(2)  | 2528(3) | 55(1)          |
| C(3)   | 6780(3)  | 3848(2)  | 3861(3) | 56(1)          |
| C(11)  | 9384(4)  | 1305(3)  | 7300(3) | 64(1)          |
| C(9)   | 8953(3)  | 1109(2)  | 5823(3) | 53(1)          |
| N(4)   | 7480(4)  | -3774(2) | 7042(3) | 92(1)          |
| C(8)   | 7965(3)  | 115(2)   | 5619(3) | 54(1)          |
| C(16)  | 7962(4)  | -2758(2) | 7081(3) | 72(1)          |
| C(17A) | 9832(4)  | -1672(3) | 8460(3) | 66(1)          |
| C(22)  | 4965(3)  | 7450(3)  | 2868(3) | 63(1)          |
| C(26)  | 5928(4)  | 6318(3)  | 1188(3) | 66(1)          |
| C(23)  | 4481(4)  | 8193(3)  | 1890(4) | 74(1)          |
| C(6)   | 7168(5)  | 830(3)   | 3312(3) | 86(1)          |
| N(2)   | 9179(4)  | -3635(2) | 8679(3) | 90(1)          |
| C(7)   | 7756(5)  | -98(3)   | 4107(3) | 78(1)          |
| C(18)  | 7585(4)  | -465(3)  | 8667(3) | 74(1)          |
| C(15)  | 7505(5)  | -1848(3) | 6192(4) | 79(1)          |
| N(3)   | 8259(5)  | -4291(3) | 8059(3) | 102(1)         |
| C(24)  | 4717(4)  | 7988(3)  | 573(4)  | 78(1)          |
| C(19)  | 10191(7) | -1670(4) | 9951(5) | 98(2)          |
| C(25)  | 5433(5)  | 7053(3)  | 221(4)  | 81(1)          |

Table 3. Bond lengths [Å] and angles [°] for **14**.

|              |          |
|--------------|----------|
| O(1)-C(3)    | 1.376(3) |
| O(1)-C(20)   | 1.428(3) |
| C(14)-C(15)  | 1.533(4) |
| C(14)-C(8)   | 1.536(4) |
| C(14)-C(13)  | 1.557(4) |
| C(14)-H(14)  | 1.04(3)  |
| C(20)-C(21)  | 1.506(4) |
| C(20)-H(20A) | 1.06(3)  |
| C(20)-H(20B) | 0.96(3)  |
| C(13)-C(12)  | 1.521(4) |
| C(13)-C(18)  | 1.529(4) |
| C(13)-C(17A) | 1.545(4) |
| C(1)-C(2)    | 1.385(4) |
| C(1)-C(10)   | 1.386(4) |
| C(1)-H(1)    | 0.97(3)  |
| C(2)-C(3)    | 1.384(4) |
| C(2)-H(2)    | 0.95(4)  |
| C(5)-C(4)    | 1.384(4) |
| C(5)-C(10)   | 1.404(4) |
| C(5)-C(6)    | 1.505(4) |
| N(1)-C(16)   | 1.329(4) |
| N(1)-N(2)    | 1.354(4) |
| N(1)-C(17A)  | 1.473(4) |
| C(12)-C(11)  | 1.519(4) |
| C(12)-H(12A) | 0.95(3)  |
| C(12)-H(12B) | 0.99(4)  |
| C(10)-C(9)   | 1.521(4) |
| C(4)-C(3)    | 1.379(4) |
| C(4)-H(4)    | 0.97(3)  |
| C(21)-C(22)  | 1.382(4) |
| C(21)-C(26)  | 1.388(4) |
| C(11)-C(9)   | 1.526(4) |
| C(11)-H(11A) | 1.02(3)  |
| C(11)-H(11B) | 1.02(4)  |
| C(9)-C(8)    | 1.522(4) |
| C(9)-H(9)    | 1.04(3)  |
| N(4)-C(16)   | 1.326(4) |
| N(4)-N(3)    | 1.363(4) |
| C(8)-C(7)    | 1.536(4) |
| C(8)-H(8)    | 1.08(3)  |
| C(16)-C(15)  | 1.476(5) |
| C(17A)-C(19) | 1.508(6) |
| C(17A)-H(17) | 0.94(3)  |
| C(22)-C(23)  | 1.393(4) |
| C(22)-H(22)  | 0.93(3)  |
| C(26)-C(25)  | 1.382(4) |
| C(26)-H(26)  | 0.93(3)  |
| C(23)-C(24)  | 1.368(5) |
| C(23)-H(23)  | 0.98(4)  |
| C(6)-C(7)    | 1.476(4) |
| C(6)-H(6A)   | 0.9700   |
| C(6)-H(6B)   | 0.9700   |
| N(2)-N(3)    | 1.294(4) |
| C(7)-H(7A)   | 0.9700   |
| C(7)-H(7B)   | 0.9700   |
| C(18)-H(18A) | 0.9600   |
| C(18)-H(18B) | 0.9600   |
| C(18)-H(18C) | 0.9600   |



|                     |           |
|---------------------|-----------|
| C(15)-H(15A)        | 0.97(5)   |
| C(15)-H(15B)        | 0.94(4)   |
| C(24)-C(25)         | 1.376(5)  |
| C(24)-H(24)         | 0.97(4)   |
| C(19)-H(19A)        | 0.91(4)   |
| C(19)-H(19B)        | 0.99(5)   |
| C(19)-H(19C)        | 0.93(4)   |
| C(25)-H(25)         | 0.95(4)   |
|                     |           |
| C(3)-O(1)-C(20)     | 117.2(2)  |
| C(15)-C(14)-C(8)    | 110.7(2)  |
| C(15)-C(14)-C(13)   | 111.0(3)  |
| C(8)-C(14)-C(13)    | 113.9(2)  |
| C(15)-C(14)-H(14)   | 105.9(15) |
| C(8)-C(14)-H(14)    | 110.3(15) |
| C(13)-C(14)-H(14)   | 104.7(14) |
| O(1)-C(20)-C(21)    | 108.5(2)  |
| O(1)-C(20)-H(20A)   | 113.0(16) |
| C(21)-C(20)-H(20A)  | 107.5(16) |
| O(1)-C(20)-H(20B)   | 108(2)    |
| C(21)-C(20)-H(20B)  | 113.8(19) |
| H(20A)-C(20)-H(20B) | 106(2)    |
| C(12)-C(13)-C(18)   | 111.0(3)  |
| C(12)-C(13)-C(17A)  | 107.5(2)  |
| C(18)-C(13)-C(17A)  | 111.0(3)  |
| C(12)-C(13)-C(14)   | 107.4(2)  |
| C(18)-C(13)-C(14)   | 111.6(2)  |
| C(17A)-C(13)-C(14)  | 108.1(2)  |
| C(2)-C(1)-C(10)     | 122.7(3)  |
| C(2)-C(1)-H(1)      | 116.0(16) |
| C(10)-C(1)-H(1)     | 121.2(16) |
| C(3)-C(2)-C(1)      | 118.9(3)  |
| C(3)-C(2)-H(2)      | 122(2)    |
| C(1)-C(2)-H(2)      | 119(2)    |
| C(4)-C(5)-C(10)     | 119.7(3)  |
| C(4)-C(5)-C(6)      | 119.3(2)  |
| C(10)-C(5)-C(6)     | 121.0(3)  |
| C(16)-N(1)-N(2)     | 108.5(3)  |
| C(16)-N(1)-C(17A)   | 127.1(2)  |
| N(2)-N(1)-C(17A)    | 124.4(3)  |
| C(11)-C(12)-C(13)   | 113.7(2)  |
| C(11)-C(12)-H(12A)  | 112(2)    |
| C(13)-C(12)-H(12A)  | 109(2)    |
| C(11)-C(12)-H(12B)  | 109(2)    |
| C(13)-C(12)-H(12B)  | 108(2)    |
| H(12A)-C(12)-H(12B) | 106(3)    |
| C(1)-C(10)-C(5)     | 117.6(3)  |
| C(1)-C(10)-C(9)     | 122.7(2)  |
| C(5)-C(10)-C(9)     | 119.6(2)  |
| C(3)-C(4)-C(5)      | 121.7(2)  |
| C(3)-C(4)-H(4)      | 119.3(19) |
| C(5)-C(4)-H(4)      | 119.0(19) |
| C(22)-C(21)-C(26)   | 118.7(3)  |
| C(22)-C(21)-C(20)   | 119.9(3)  |
| C(26)-C(21)-C(20)   | 121.3(3)  |
| O(1)-C(3)-C(4)      | 115.8(2)  |
| O(1)-C(3)-C(2)      | 124.8(3)  |
| C(4)-C(3)-C(2)      | 119.5(3)  |
| C(12)-C(11)-C(9)    | 112.0(3)  |
| C(12)-C(11)-H(11A)  | 111.4(18) |

|                     |           |
|---------------------|-----------|
| C(9)-C(11)-H(11A)   | 106.8(16) |
| C(12)-C(11)-H(11B)  | 109(2)    |
| C(9)-C(11)-H(11B)   | 110(2)    |
| H(11A)-C(11)-H(11B) | 107(3)    |
| C(10)-C(9)-C(8)     | 109.7(2)  |
| C(10)-C(9)-C(11)    | 113.4(2)  |
| C(8)-C(9)-C(11)     | 112.1(2)  |
| C(10)-C(9)-H(9)     | 110.0(18) |
| C(8)-C(9)-H(9)      | 104.3(18) |
| C(11)-C(9)-H(9)     | 107.0(16) |
| C(16)-N(4)-N(3)     | 105.3(3)  |
| C(9)-C(8)-C(14)     | 112.8(2)  |
| C(9)-C(8)-C(7)      | 108.1(2)  |
| C(14)-C(8)-C(7)     | 111.8(2)  |
| C(9)-C(8)-H(8)      | 105.9(15) |
| C(14)-C(8)-H(8)     | 108.1(15) |
| C(7)-C(8)-H(8)      | 110.0(14) |
| N(4)-C(16)-N(1)     | 109.0(3)  |
| N(4)-C(16)-C(15)    | 128.2(3)  |
| N(1)-C(16)-C(15)    | 122.8(3)  |
| N(1)-C(17A)-C(19)   | 109.9(3)  |
| N(1)-C(17A)-C(13)   | 108.3(2)  |
| C(19)-C(17A)-C(13)  | 116.1(3)  |
| N(1)-C(17A)-H(17)   | 108(2)    |
| C(19)-C(17A)-H(17)  | 105.6(19) |
| C(13)-C(17A)-H(17)  | 108(2)    |
| C(21)-C(22)-C(23)   | 120.9(3)  |
| C(21)-C(22)-H(22)   | 117(2)    |
| C(23)-C(22)-H(22)   | 122(2)    |
| C(25)-C(26)-C(21)   | 120.2(3)  |
| C(25)-C(26)-H(26)   | 123(2)    |
| C(21)-C(26)-H(26)   | 117(2)    |
| C(24)-C(23)-C(22)   | 119.6(3)  |
| C(24)-C(23)-H(23)   | 125(2)    |
| C(22)-C(23)-H(23)   | 115(2)    |
| C(7)-C(6)-C(5)      | 116.8(3)  |
| C(7)-C(6)-H(6A)     | 108.1     |
| C(5)-C(6)-H(6A)     | 108.1     |
| C(7)-C(6)-H(6B)     | 108.1     |
| C(5)-C(6)-H(6B)     | 108.1     |
| H(6A)-C(6)-H(6B)    | 107.3     |
| N(3)-N(2)-N(1)      | 106.2(3)  |
| C(6)-C(7)-C(8)      | 114.8(3)  |
| C(6)-C(7)-H(7A)     | 108.6     |
| C(8)-C(7)-H(7A)     | 108.6     |
| C(6)-C(7)-H(7B)     | 108.6     |
| C(8)-C(7)-H(7B)     | 108.6     |
| H(7A)-C(7)-H(7B)    | 107.6     |
| C(13)-C(18)-H(18A)  | 109.5     |
| C(13)-C(18)-H(18B)  | 109.5     |
| H(18A)-C(18)-H(18B) | 109.5     |
| C(13)-C(18)-H(18C)  | 109.5     |
| H(18A)-C(18)-H(18C) | 109.5     |
| H(18B)-C(18)-H(18C) | 109.5     |
| C(16)-C(15)-C(14)   | 111.0(3)  |
| C(16)-C(15)-H(15A)  | 109(3)    |
| C(14)-C(15)-H(15A)  | 112(3)    |
| C(16)-C(15)-H(15B)  | 108(3)    |
| C(14)-C(15)-H(15B)  | 110(3)    |
| H(15A)-C(15)-H(15B) | 107(4)    |

|                     |          |
|---------------------|----------|
| N(2)-N(3)-N(4)      | 111.0(3) |
| C(23)-C(24)-C(25)   | 120.1(3) |
| C(23)-C(24)-H(24)   | 120(2)   |
| C(25)-C(24)-H(24)   | 119(2)   |
| C(17A)-C(19)-H(19A) | 111(3)   |
| C(17A)-C(19)-H(19B) | 106(3)   |
| H(19A)-C(19)-H(19B) | 103(3)   |
| C(17A)-C(19)-H(19C) | 113(3)   |
| H(19A)-C(19)-H(19C) | 117(4)   |
| H(19B)-C(19)-H(19C) | 107(4)   |
| C(24)-C(25)-C(26)   | 120.5(4) |
| C(24)-C(25)-H(25)   | 125(2)   |
| C(26)-C(25)-H(25)   | 114(2)   |

Symmetry transformations used to generate equivalent atoms:

Table 4. Anisotropic displacement parameters ( $\text{\AA}^2 \times 10^3$ ) for **14**. The anisotropic displacement factor exponent takes the form:  $-2\pi^2[h^2a^{*2}U^{11} + \dots + 2hk a^* b^* U^{12}]$

|        | $U^{11}$ | $U^{22}$ | $U^{33}$ | $U^{23}$ | $U^{13}$ | $U^{12}$ |
|--------|----------|----------|----------|----------|----------|----------|
| O(1)   | 77(1)    | 51(1)    | 69(1)    | 7(1)     | -21(1)   | -6(1)    |
| C(14)  | 61(2)    | 46(2)    | 55(2)    | -1(1)    | -3(1)    | 3(1)     |
| C(20)  | 63(2)    | 51(2)    | 57(2)    | 6(1)     | -4(1)    | 1(1)     |
| C(13)  | 58(1)    | 50(1)    | 50(2)    | 5(1)     | -3(1)    | 4(1)     |
| C(1)   | 61(2)    | 47(1)    | 48(2)    | 1(1)     | -5(1)    | -9(1)    |
| C(2)   | 65(2)    | 49(2)    | 52(2)    | 4(1)     | -1(1)    | -6(1)    |
| C(5)   | 78(2)    | 52(2)    | 44(1)    | 1(1)     | -4(1)    | -5(1)    |
| N(1)   | 92(2)    | 46(1)    | 67(2)    | 9(1)     | -5(1)    | 8(1)     |
| C(12)  | 74(2)    | 57(2)    | 56(2)    | 6(2)     | -16(2)   | -6(2)    |
| C(10)  | 59(2)    | 52(2)    | 46(1)    | 3(1)     | -1(1)    | -6(1)    |
| C(4)   | 79(2)    | 53(2)    | 47(2)    | 1(1)     | -13(1)   | -5(1)    |
| C(21)  | 52(1)    | 52(2)    | 61(2)    | 8(1)     | -2(1)    | -3(1)    |
| C(3)   | 59(2)    | 50(2)    | 57(2)    | 12(1)    | -3(1)    | -2(1)    |
| C(11)  | 82(2)    | 54(2)    | 54(2)    | 2(1)     | -17(2)   | -5(2)    |
| C(9)   | 61(2)    | 47(2)    | 51(2)    | 3(1)     | -3(1)    | 0(1)     |
| N(4)   | 143(3)   | 49(2)    | 81(2)    | 4(2)     | -18(2)   | -11(2)   |
| C(8)   | 62(2)    | 46(2)    | 52(2)    | 0(1)     | -6(1)    | -1(1)    |
| C(16)  | 103(2)   | 45(2)    | 68(2)    | 0(2)     | -5(2)    | -3(2)    |
| C(17A) | 70(2)    | 56(2)    | 70(2)    | 11(2)    | -5(2)    | 5(2)     |
| C(22)  | 68(2)    | 59(2)    | 61(2)    | 6(2)     | 3(1)     | 10(1)    |
| C(26)  | 79(2)    | 57(2)    | 62(2)    | 10(2)    | 4(2)     | 11(2)    |
| C(23)  | 85(2)    | 58(2)    | 79(2)    | 8(2)     | 5(2)     | 18(2)    |
| C(6)   | 147(3)   | 58(2)    | 51(2)    | -7(2)    | -22(2)   | 4(2)     |
| N(2)   | 131(3)   | 51(2)    | 87(2)    | 14(2)    | -13(2)   | 9(2)     |
| C(7)   | 122(3)   | 49(2)    | 61(2)    | -3(1)    | -19(2)   | 3(2)     |
| C(18)  | 83(2)    | 71(2)    | 69(2)    | 6(2)     | 14(2)    | 10(2)    |
| C(15)  | 106(3)   | 50(2)    | 78(2)    | 7(2)     | -28(2)   | -11(2)   |
| N(3)   | 164(3)   | 49(2)    | 90(2)    | 5(2)     | -16(2)   | -1(2)    |
| C(24)  | 87(2)    | 75(2)    | 72(2)    | 23(2)    | 4(2)     | 12(2)    |
| C(19)  | 130(4)   | 71(3)    | 87(3)    | 20(2)    | -39(3)   | -5(3)    |
| C(25)  | 99(3)    | 86(3)    | 59(2)    | 12(2)    | 9(2)     | 14(2)    |

Table 5. Hydrogen coordinates ( $\times 10^4$ ) and isotropic displacement parameters ( $\text{\AA}^2 \times 10^3$ ) for **14**.

|        | x         | y         | z         | U(eq)   |
|--------|-----------|-----------|-----------|---------|
| H(6A)  | 6117      | 713       | 3123      | 104     |
| H(6B)  | 7636      | 830       | 2461      | 104     |
| H(7A)  | 8704      | -305      | 3773      | 93      |
| H(7B)  | 7088      | -708      | 3966      | 93      |
| H(18A) | 7871      | -183      | 9538      | 111     |
| H(18B) | 7051      | -1132     | 8761      | 111     |
| H(18C) | 6964      | 52        | 8189      | 111     |
| H(14)  | 9560(30)  | -1140(20) | 5990(20)  | 52(7)   |
| H(8)   | 6920(30)  | 330(20)   | 6020(30)  | 62(8)   |
| H(1)   | 8830(30)  | 3260(20)  | 6520(30)  | 50(7)   |
| H(2)   | 7660(40)  | 4690(30)  | 5480(40)  | 87(11)  |
| H(12A) | 10300(30) | 420(30)   | 8900(30)  | 74(9)   |
| H(11A) | 8450(30)  | 1570(30)  | 7740(30)  | 69(9)   |
| H(25)  | 5660(40)  | 6860(30)  | -660(40)  | 98(12)  |
| H(19A) | 10750(50) | -1080(30) | 10200(40) | 104(15) |
| H(20A) | 7400(30)  | 5940(20)  | 3840(30)  | 59(8)   |
| H(20B) | 5780(30)  | 5810(30)  | 4430(30)  | 73(9)   |
| H(4)   | 6080(30)  | 2710(20)  | 2500(30)  | 63(8)   |
| H(23)  | 4060(40)  | 8860(30)  | 2230(40)  | 102(12) |
| H(15A) | 6490(60)  | -1650(40) | 6360(50)  | 141(19) |
| H(19B) | 10890(50) | -2280(40) | 10120(40) | 115(15) |
| H(17)  | 10750(30) | -1700(30) | 8060(30)  | 72(10)  |
| H(24)  | 4380(40)  | 8490(30)  | -120(40)  | 93(12)  |
| H(11B) | 10140(40) | 1920(30)  | 7400(40)  | 101(13) |
| H(26)  | 6390(30)  | 5670(30)  | 980(30)   | 80(10)  |
| H(15B) | 7500(40)  | -2100(30) | 5300(40)  | 97(13)  |
| H(9)   | 9920(30)  | 900(30)   | 5360(30)  | 75(9)   |
| H(22)  | 4910(40)  | 7590(30)  | 3780(30)  | 74(10)  |
| H(12B) | 10940(40) | 80(30)    | 7550(30)  | 80(10)  |
| H(19C) | 9370(50)  | -1810(40) | 10450(40) | 112(18) |

**ORTEP PLOT for compound 14 with 30% thermal ellipsoids**

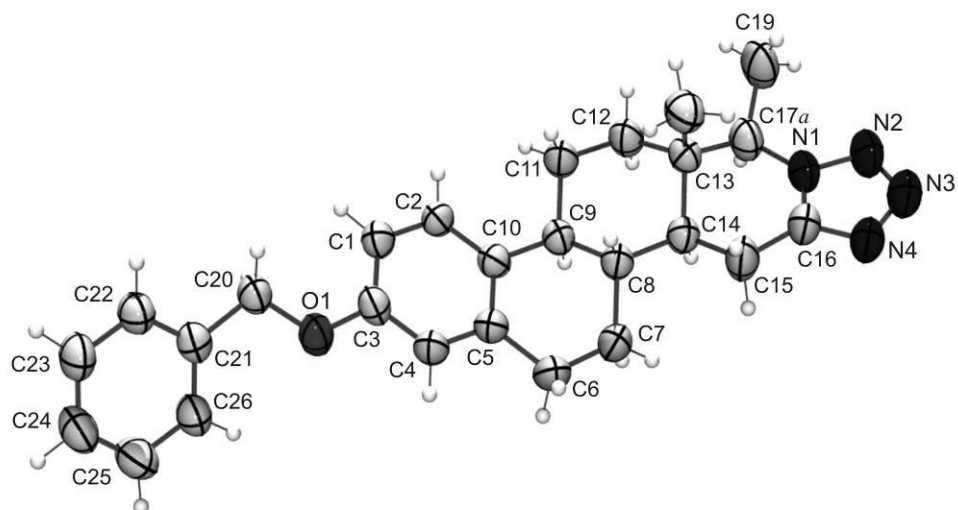

Supplement: c2md20327h.pdf [file c2md20327h.pdf]
